# Supplementary material for: Impact of the linker groups in bis(7-azaindol-1-yl) chelate ligands on structures and stability of Pt(N,N-L)R2 complexes
Source: Royal Society of Chemistry journal article supplement (doi:10.1039/b813501k), 2008-01-01
Supplement: b813501k.pdf [file b813501k.pdf]

# Supporting Information

## Impact of the Linker Groups in Bis(7-azaindol-1-yl) Chelate Ligands on Structures and Stability of Pt(*N,N*-L) $R_2$ Complexes

Shu-Bin Zhao,<sup>a</sup> Guohui Liu,<sup>a</sup> Datong Song,<sup>b</sup> Suning Wang<sup>\*a</sup>

<sup>a</sup>Department of Chemistry, Queen's University, Kingston, Ontario, K7L 3N6, Canada

<sup>b</sup>Department of Chemistry, University of Toronto, 80 St. George Street, Toronto, Ontario, M5S 3H6,  
Canada, wangs@chem.queensu.ca

---

**S1 X-ray structure data for BAHE.**

**S2 X-ray structure data for compound 1.**

**S3 X-ray structure data for compound 2.**

**S4 X-ray structure data for compound 3.**

**S5 X-ray structure data for compound 4.**

**S6 X-ray structure data for compound 5.**

**S7 X-ray structure data for compound 6.**

**S8 X-ray structure data for compound 7.**

**S9 X-ray structure data for compound 8.**

**S10 X-ray structure data for compound 9a.**

## S1 X-ray structure data for BAHE.

Diagrams showing the structure of compound **BAHE** with labeling schemes:

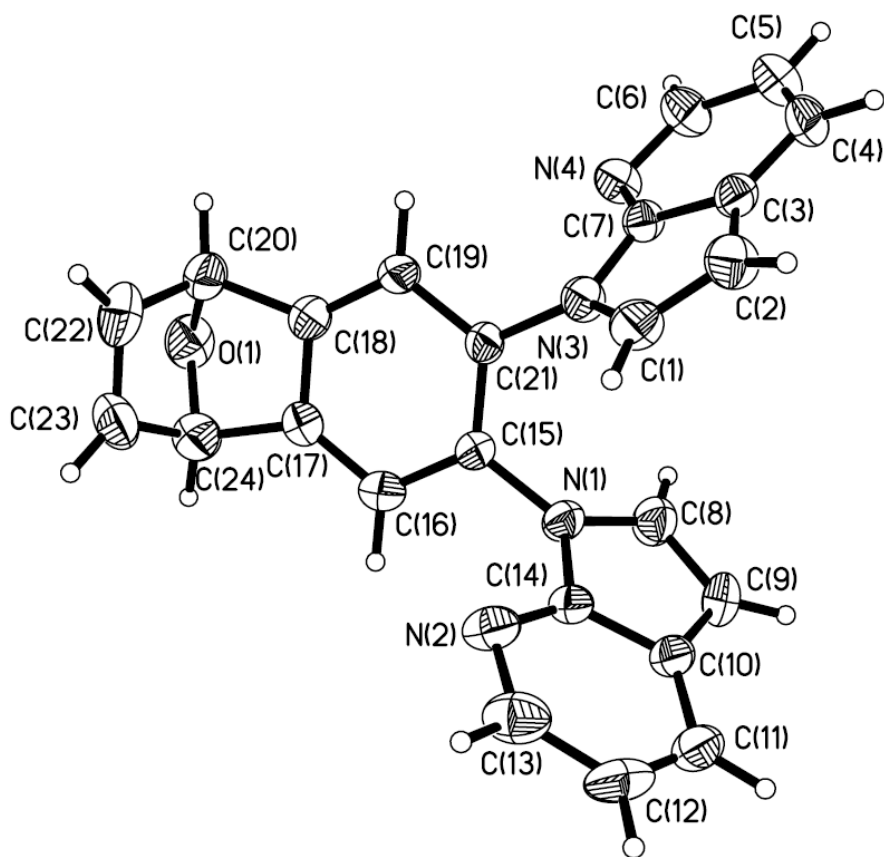

Table 1. Crystal data and structure refinement for **BAHE**.

|                                   |                                                  |          |
|-----------------------------------|--------------------------------------------------|----------|
| Identification code               | BAHE                                             |          |
| Empirical formula                 | C <sub>24</sub> H <sub>18</sub> N <sub>4</sub> O |          |
| Formula weight                    | 378.42                                           |          |
| Temperature                       | 297(2) K                                         |          |
| Wavelength                        | 0.71073 Å                                        |          |
| Crystal system                    | Tetragonal                                       |          |
| Space group                       | P4(3)2(1)2                                       |          |
| Unit cell dimensions              | a = 10.721(5) Å                                  | α = 90°. |
|                                   | b = 10.721(5) Å                                  | β = 90°. |
|                                   | c = 32.66(3) Å                                   | γ = 90°. |
| Volume                            | 3753(5) Å <sup>3</sup>                           |          |
| Z                                 | 8                                                |          |
| Density (calculated)              | 1.339 Mg/m <sup>3</sup>                          |          |
| Absorption coefficient            | 0.085 mm <sup>-1</sup>                           |          |
| F(000)                            | 1584                                             |          |
| Crystal size                      | 0.2 x 0.2 x 0.1 mm <sup>3</sup>                  |          |
| Theta range for data collection   | 2.00 to 28.46°.                                  |          |
| Index ranges                      | -12 ≤ h ≤ 14, -14 ≤ k ≤ 13, -43 ≤ l ≤ 39         |          |
| Reflections collected             | 21383                                            |          |
| Independent reflections           | 4544 [R(int) = 0.1091]                           |          |
| Completeness to theta = 28.46°    | 96.8 %                                           |          |
| Absorption correction             | Semi-empirical from equivalents                  |          |
| Refinement method                 | Full-matrix least-squares on F <sup>2</sup>      |          |
| Data / restraints / parameters    | 4544 / 0 / 263                                   |          |
| Goodness-of-fit on F <sup>2</sup> | 0.971                                            |          |
| Final R indices [I > 2σ(I)]       | R1 = 0.0579, wR2 = 0.1099                        |          |
| R indices (all data)              | R1 = 0.2214, wR2 = 0.1572                        |          |
| Absolute structure parameter      | -2(4)                                            |          |
| Extinction coefficient            | 0.0016(5)                                        |          |
| Largest diff. peak and hole       | 0.200 and -0.193 e.Å <sup>-3</sup>               |          |

Table 2. Atomic coordinates ( $\times 10^4$ ) and equivalent isotropic displacement parameters ( $\text{\AA}^2 \times 10^3$ ) for BAHE.  $U(\text{eq})$  is defined as one third of the trace of the orthogonalized  $U^{ij}$  tensor.

|       | x        | y        | z       | $U(\text{eq})$ |
|-------|----------|----------|---------|----------------|
| O(1)  | 5245(3)  | 2723(3)  | 734(1)  | 79(1)          |
| N(1)  | 7808(3)  | 7269(3)  | 1265(1) | 52(1)          |
| N(2)  | 8989(4)  | 7695(3)  | 665(1)  | 65(1)          |
| N(3)  | 8929(3)  | 5367(3)  | 1736(1) | 54(1)          |
| N(4)  | 7860(3)  | 4422(3)  | 2302(1) | 57(1)          |
| C(1)  | 10043(5) | 5993(4)  | 1694(1) | 67(1)          |
| C(2)  | 10637(4) | 6079(4)  | 2056(2) | 71(1)          |
| C(3)  | 9863(4)  | 5489(4)  | 2354(1) | 55(1)          |
| C(4)  | 9903(5)  | 5284(5)  | 2771(1) | 70(1)          |
| C(5)  | 8943(5)  | 4639(5)  | 2945(1) | 74(2)          |
| C(6)  | 7951(5)  | 4230(5)  | 2708(1) | 70(1)          |
| C(7)  | 8814(4)  | 5045(4)  | 2145(1) | 47(1)          |
| C(8)  | 7459(5)  | 7942(4)  | 1603(1) | 66(1)          |
| C(9)  | 7877(5)  | 9125(5)  | 1575(1) | 73(2)          |
| C(10) | 8550(5)  | 9221(4)  | 1202(1) | 58(1)          |
| C(11) | 9230(5)  | 10125(5) | 989(2)  | 74(2)          |
| C(12) | 9769(5)  | 9791(5)  | 627(2)  | 83(2)          |
| C(13) | 9640(5)  | 8593(6)  | 479(2)  | 80(2)          |
| C(14) | 8475(4)  | 8054(4)  | 1016(1) | 49(1)          |
| C(15) | 7535(4)  | 5986(4)  | 1183(1) | 50(1)          |
| C(16) | 6735(5)  | 5693(4)  | 862(1)  | 65(1)          |
| C(17) | 6470(4)  | 4465(5)  | 794(1)  | 62(1)          |
| C(18) | 7006(4)  | 3529(4)  | 1028(1) | 59(1)          |
| C(19) | 7814(4)  | 3796(4)  | 1340(1) | 55(1)          |
| C(20) | 6487(5)  | 2334(4)  | 839(1)  | 69(1)          |
| C(21) | 8091(4)  | 5060(4)  | 1415(1) | 49(1)          |
| C(22) | 7082(5)  | 2218(5)  | 422(2)  | 86(2)          |
| C(23) | 6535(6)  | 3150(6)  | 196(2)  | 95(2)          |
| C(24) | 5627(5)  | 3777(5)  | 487(1)  | 79(2)          |

Table 3. Bond lengths [ $\text{\AA}$ ] and angles [ $^\circ$ ] for BAHE.

|             |          |                   |          |
|-------------|----------|-------------------|----------|
| O(1)-C(20)  | 1.437(6) | C(23)-C(24)       | 1.517(7) |
| O(1)-C(24)  | 1.448(5) |                   |          |
| N(1)-C(14)  | 1.370(5) | C(20)-O(1)-C(24)  | 95.6(4)  |
| N(1)-C(8)   | 1.372(5) | C(14)-N(1)-C(8)   | 107.2(3) |
| N(1)-C(15)  | 1.432(5) | C(14)-N(1)-C(15)  | 125.9(3) |
| N(2)-C(14)  | 1.329(5) | C(8)-N(1)-C(15)   | 126.9(4) |
| N(2)-C(13)  | 1.335(6) | C(14)-N(2)-C(13)  | 113.6(4) |
| N(3)-C(1)   | 1.377(5) | C(1)-N(3)-C(7)    | 107.1(3) |
| N(3)-C(7)   | 1.386(5) | C(1)-N(3)-C(21)   | 126.1(4) |
| N(3)-C(21)  | 1.419(5) | C(7)-N(3)-C(21)   | 126.7(3) |
| N(4)-C(7)   | 1.324(5) | C(7)-N(4)-C(6)    | 113.7(4) |
| N(4)-C(6)   | 1.347(5) | C(2)-C(1)-N(3)    | 110.9(4) |
| C(1)-C(2)   | 1.346(6) | C(1)-C(2)-C(3)    | 107.0(4) |
| C(2)-C(3)   | 1.426(6) | C(4)-C(3)-C(7)    | 116.8(4) |
| C(3)-C(4)   | 1.381(5) | C(4)-C(3)-C(2)    | 136.5(4) |
| C(3)-C(7)   | 1.398(5) | C(7)-C(3)-C(2)    | 106.7(4) |
| C(4)-C(5)   | 1.364(6) | C(5)-C(4)-C(3)    | 117.9(4) |
| C(5)-C(6)   | 1.386(6) | C(4)-C(5)-C(6)    | 120.4(4) |
| C(8)-C(9)   | 1.349(6) | N(4)-C(6)-C(5)    | 123.9(4) |
| C(9)-C(10)  | 1.422(6) | N(4)-C(7)-N(3)    | 124.5(4) |
| C(10)-C(14) | 1.392(5) | N(4)-C(7)-C(3)    | 127.2(4) |
| C(10)-C(11) | 1.397(6) | N(3)-C(7)-C(3)    | 108.3(4) |
| C(11)-C(12) | 1.364(6) | C(9)-C(8)-N(1)    | 110.5(4) |
| C(12)-C(13) | 1.380(7) | C(8)-C(9)-C(10)   | 107.1(4) |
| C(15)-C(21) | 1.384(5) | C(14)-C(10)-C(11) | 116.0(4) |
| C(15)-C(16) | 1.390(6) | C(14)-C(10)-C(9)  | 106.2(4) |
| C(16)-C(17) | 1.365(6) | C(11)-C(10)-C(9)  | 137.8(5) |
| C(17)-C(18) | 1.386(6) | C(12)-C(11)-C(10) | 118.0(5) |
| C(17)-C(24) | 1.538(6) | C(11)-C(12)-C(13) | 120.4(5) |
| C(18)-C(19) | 1.368(5) | N(2)-C(13)-C(12)  | 124.3(5) |
| C(18)-C(20) | 1.526(6) | N(2)-C(14)-N(1)   | 123.3(4) |
| C(19)-C(21) | 1.408(5) | N(2)-C(14)-C(10)  | 127.7(4) |
| C(20)-C(22) | 1.511(6) | N(1)-C(14)-C(10)  | 109.0(4) |
| C(22)-C(23) | 1.374(7) | C(21)-C(15)-C(16) | 121.1(4) |

|                   |          |                   |          |
|-------------------|----------|-------------------|----------|
| C(21)-C(15)-N(1)  | 119.9(4) | O(1)-C(20)-C(18)  | 101.0(4) |
| C(16)-C(15)-N(1)  | 119.0(4) | C(22)-C(20)-C(18) | 106.2(4) |
| C(17)-C(16)-C(15) | 118.0(4) | C(15)-C(21)-C(19) | 120.3(4) |
| C(16)-C(17)-C(18) | 121.5(4) | C(15)-C(21)-N(3)  | 120.7(4) |
| C(16)-C(17)-C(24) | 133.7(4) | C(19)-C(21)-N(3)  | 119.0(4) |
| C(18)-C(17)-C(24) | 104.8(4) | C(23)-C(22)-C(20) | 104.1(5) |
| C(19)-C(18)-C(17) | 121.4(4) | C(22)-C(23)-C(24) | 105.1(4) |
| C(19)-C(18)-C(20) | 135.0(4) | O(1)-C(24)-C(23)  | 100.7(4) |
| C(17)-C(18)-C(20) | 103.6(4) | O(1)-C(24)-C(17)  | 100.2(4) |
| C(18)-C(19)-C(21) | 117.7(4) | C(23)-C(24)-C(17) | 104.1(5) |
| O(1)-C(20)-C(22)  | 101.5(4) |                   |          |

Table 4. Anisotropic displacement parameters ( $\text{\AA}^2 \times 10^3$ ) for BAHE. The anisotropic displacement factor exponent takes the form:  $-2\pi^2 [ h^2 a^{*2} U^{11} + \dots + 2 h k a^* b^* U^{12} ]$

|       | $U^{11}$ | $U^{22}$ | $U^{33}$ | $U^{23}$ | $U^{13}$ | $U^{12}$ |
|-------|----------|----------|----------|----------|----------|----------|
| O(1)  | 72(2)    | 81(2)    | 84(2)    | -3(2)    | -5(2)    | -24(2)   |
| N(1)  | 66(2)    | 41(2)    | 49(2)    | 2(2)     | 5(2)     | -5(2)    |
| N(2)  | 72(3)    | 52(2)    | 69(2)    | 12(2)    | 19(2)    | 12(2)    |
| N(3)  | 50(2)    | 53(2)    | 57(2)    | 3(2)     | -4(2)    | -11(2)   |
| N(4)  | 46(2)    | 67(2)    | 58(2)    | 10(2)    | -2(2)    | -11(2)   |
| C(1)  | 66(3)    | 63(3)    | 71(3)    | 13(3)    | 3(3)     | -22(3)   |
| C(2)  | 54(3)    | 76(4)    | 84(3)    | 8(3)     | -12(3)   | -16(3)   |
| C(3)  | 46(3)    | 46(3)    | 71(3)    | -2(2)    | -15(2)   | -1(2)    |
| C(4)  | 66(3)    | 76(4)    | 68(3)    | -8(3)    | -27(3)   | 0(3)     |
| C(5)  | 70(4)    | 95(4)    | 55(3)    | 3(3)     | -10(3)   | -1(3)    |
| C(6)  | 59(3)    | 89(4)    | 61(3)    | 8(3)     | -2(3)    | -4(3)    |
| C(7)  | 42(3)    | 46(2)    | 54(2)    | 1(2)     | -3(2)    | -4(2)    |
| C(8)  | 81(4)    | 60(3)    | 58(3)    | -7(2)    | 7(3)     | -3(3)    |
| C(9)  | 98(4)    | 57(3)    | 64(3)    | -22(3)   | -8(3)    | -3(3)    |
| C(10) | 65(3)    | 45(3)    | 65(3)    | 5(2)     | -17(3)   | -3(2)    |
| C(11) | 85(4)    | 49(3)    | 88(4)    | 10(3)    | -24(3)   | -10(3)   |
| C(12) | 84(4)    | 61(4)    | 104(4)   | 36(3)    | 2(3)     | -7(3)    |
| C(13) | 80(4)    | 82(4)    | 78(3)    | 20(3)    | 21(3)    | 13(3)    |

|       |        |       |       |        |        |        |
|-------|--------|-------|-------|--------|--------|--------|
| C(14) | 52(3)  | 43(3) | 50(2) | 5(2)   | -3(2)  | 4(2)   |
| C(15) | 63(3)  | 40(3) | 46(2) | 1(2)   | -3(2)  | -3(2)  |
| C(16) | 79(3)  | 54(3) | 61(3) | 9(2)   | -12(3) | 5(3)   |
| C(17) | 73(3)  | 59(3) | 53(2) | -3(2)  | -13(2) | 0(3)   |
| C(18) | 66(3)  | 50(3) | 60(3) | -1(2)  | -5(3)  | -9(3)  |
| C(19) | 66(3)  | 43(3) | 57(2) | 5(2)   | -15(2) | -7(2)  |
| C(20) | 77(4)  | 55(3) | 74(3) | -7(3)  | -12(3) | -5(3)  |
| C(21) | 57(3)  | 44(3) | 46(2) | 0(2)   | -6(2)  | -12(2) |
| C(22) | 86(4)  | 83(4) | 89(4) | -35(3) | 9(3)   | 4(3)   |
| C(23) | 145(6) | 92(5) | 49(3) | -3(3)  | -6(3)  | -19(4) |
| C(24) | 91(4)  | 72(4) | 73(3) | 3(3)   | -12(3) | -6(3)  |

Table 5. Hydrogen coordinates ( $\times 10^4$ ) and isotropic displacement parameters ( $\text{\AA}^2 \times 10^{-3}$ ) for BAHE.

|        | x     | y     | z    | U(eq) |
|--------|-------|-------|------|-------|
| H(1A)  | 10345 | 6314  | 1448 | 80    |
| H(2B)  | 11407 | 6452  | 2103 | 86    |
| H(4B)  | 10564 | 5576  | 2928 | 84    |
| H(5A)  | 8953  | 4473  | 3225 | 88    |
| H(6A)  | 7311  | 3797  | 2837 | 84    |
| H(8A)  | 6997  | 7626  | 1821 | 80    |
| H(9A)  | 7749  | 9760  | 1765 | 88    |
| H(11A) | 9313  | 10930 | 1092 | 89    |
| H(12A) | 10227 | 10374 | 479  | 100   |
| H(13A) | 10031 | 8398  | 233  | 96    |
| H(16A) | 6391  | 6315  | 699  | 78    |
| H(19A) | 8168  | 3166  | 1497 | 66    |
| H(20A) | 6541  | 1590  | 1013 | 83    |
| H(22A) | 7682  | 1647  | 337  | 103   |
| H(23A) | 6687  | 3354  | -76  | 114   |
| H(24A) | 4958  | 4268  | 361  | 94    |

## S2 X-ray structure data for compound 1.

Diagrams showing the structure of compound 1 with labeling schemes:

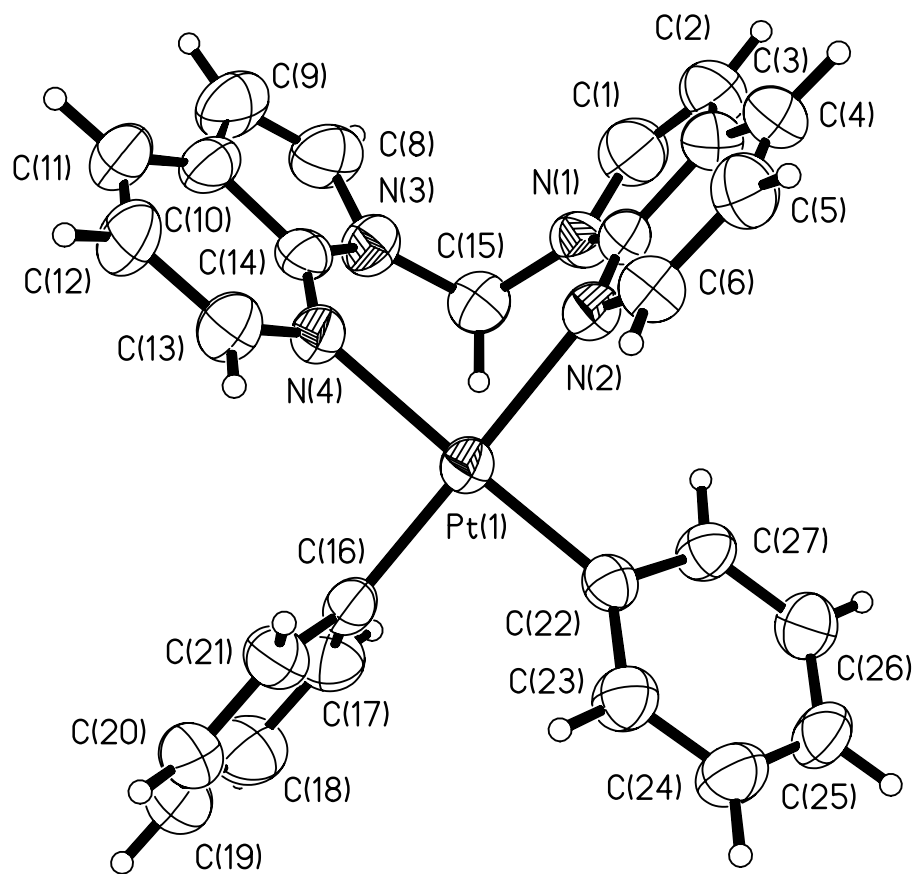



Table 1. Crystal data and structure refinement for compound **1**.

|                                   |                                                   |                 |
|-----------------------------------|---------------------------------------------------|-----------------|
| Identification code               | <b>1</b> /THF                                     |                 |
| Empirical formula                 | C <sub>27</sub> H <sub>22</sub> N <sub>4</sub> Pt |                 |
| Formula weight                    | 597.58                                            |                 |
| Temperature                       | 293(2) K                                          |                 |
| Wavelength                        | 0.71073 Å                                         |                 |
| Crystal system                    | Monoclinic                                        |                 |
| Space group                       | P2(1)/n                                           |                 |
| Unit cell dimensions              | a = 12.238(3) Å                                   | α = 90°.        |
|                                   | b = 11.930(3) Å                                   | β = 93.953(6)°. |
|                                   | c = 18.202(4) Å                                   | γ = 90°.        |
| Volume                            | 2651.0(10) Å <sup>3</sup>                         |                 |
| Z                                 | 4                                                 |                 |
| Density (calculated)              | 1.497 Mg/m <sup>3</sup>                           |                 |
| Absorption coefficient            | 5.312 mm <sup>-1</sup>                            |                 |
| F(000)                            | 1160                                              |                 |
| Crystal size                      | 0.20 x 0.20 x 0.20 mm <sup>3</sup>                |                 |
| Theta range for data collection   | 1.94 to 27.00°.                                   |                 |
| Index ranges                      | -13 ≤ h ≤ 15, -15 ≤ k ≤ 15, -23 ≤ l ≤ 23          |                 |
| Reflections collected             | 17999                                             |                 |
| Independent reflections           | 5766 [R(int) = 0.0332]                            |                 |
| Completeness to theta = 27.00°    | 99.6 %                                            |                 |
| Absorption correction             | Semi-empirical from equivalents                   |                 |
| Max. and min. transmission        | 0.4164 and 0.4164                                 |                 |
| Refinement method                 | Full-matrix least-squares on F <sup>2</sup>       |                 |
| Data / restraints / parameters    | 5766 / 0 / 289                                    |                 |
| Goodness-of-fit on F <sup>2</sup> | 0.723                                             |                 |
| Final R indices [I > 2σ(I)]       | R1 = 0.0251, wR2 = 0.0382                         |                 |
| R indices (all data)              | R1 = 0.0468, wR2 = 0.0401                         |                 |
| Largest diff. peak and hole       | 1.031 and -0.526 e.Å <sup>-3</sup>                |                 |

Table 2. Atomic coordinates ( $\times 10^4$ ) and equivalent isotropic displacement parameters ( $\text{\AA}^2 \times 10^3$ ) for compound **1**.  $U(\text{eq})$  is defined as one third of the trace of the orthogonalized  $U^{ij}$  tensor.

|       | x        | y        | z        | U(eq) |
|-------|----------|----------|----------|-------|
| Pt(1) | 6825(1)  | 8317(1)  | 668(1)   | 39(1) |
| N(1)  | 6144(2)  | 7979(3)  | -1201(2) | 49(1) |
| N(2)  | 6509(2)  | 6961(3)  | -74(2)   | 42(1) |
| N(3)  | 7727(2)  | 9159(3)  | -1010(2) | 48(1) |
| N(4)  | 8370(2)  | 8510(3)  | 211(2)   | 42(1) |
| C(1)  | 5852(3)  | 7676(4)  | -1921(3) | 67(1) |
| C(2)  | 5709(3)  | 6557(5)  | -1970(3) | 67(1) |
| C(3)  | 5949(3)  | 6112(4)  | -1261(3) | 55(1) |
| C(4)  | 5988(3)  | 5055(4)  | -944(3)  | 66(1) |
| C(5)  | 6299(3)  | 4966(4)  | -211(3)  | 62(1) |
| C(6)  | 6543(3)  | 5913(4)  | 204(2)   | 52(1) |
| C(7)  | 6222(3)  | 7022(3)  | -785(3)  | 42(1) |
| C(8)  | 8241(4)  | 9396(3)  | -1645(3) | 67(1) |
| C(9)  | 9337(4)  | 9238(3)  | -1537(3) | 72(2) |
| C(10) | 9551(3)  | 8893(3)  | -791(3)  | 53(1) |
| C(11) | 10466(3) | 8621(4)  | -342(3)  | 66(2) |
| C(12) | 10333(3) | 8300(4)  | 359(3)   | 66(1) |
| C(13) | 9294(3)  | 8253(3)  | 621(2)   | 55(1) |
| C(14) | 8511(3)  | 8833(3)  | -480(2)  | 44(1) |
| C(15) | 6549(3)  | 9086(3)  | -985(2)  | 51(1) |
| C(16) | 7167(3)  | 9533(3)  | 1390(2)  | 41(1) |
| C(17) | 6789(3)  | 10614(4) | 1299(2)  | 59(1) |
| C(18) | 7060(4)  | 11471(4) | 1791(3)  | 72(1) |
| C(19) | 7730(4)  | 11251(4) | 2405(3)  | 77(2) |
| C(20) | 8118(3)  | 10196(4) | 2523(2)  | 66(1) |
| C(21) | 7854(3)  | 9362(3)  | 2027(2)  | 50(1) |
| C(22) | 5341(3)  | 8152(3)  | 1044(2)  | 38(1) |
| C(23) | 5089(3)  | 8123(3)  | 1771(2)  | 52(1) |
| C(24) | 4029(3)  | 7975(3)  | 1984(2)  | 59(1) |
| C(25) | 3168(3)  | 7879(3)  | 1470(3)  | 55(1) |
| C(26) | 3365(3)  | 7929(3)  | 749(3)   | 57(1) |

Table 3. Bond lengths [ $\text{\AA}$ ] and angles [ $^\circ$ ] for compound **1**.

|             |          |                   |            |
|-------------|----------|-------------------|------------|
| Pt(1)-C(16) | 1.983(4) | C(19)-C(20)       | 1.358(6)   |
| Pt(1)-C(22) | 1.994(3) | C(20)-C(21)       | 1.366(5)   |
| Pt(1)-N(2)  | 2.125(3) | C(22)-C(23)       | 1.380(5)   |
| Pt(1)-N(4)  | 2.130(3) | C(22)-C(27)       | 1.399(4)   |
| N(1)-C(7)   | 1.369(4) | C(23)-C(24)       | 1.390(4)   |
| N(1)-C(1)   | 1.382(5) | C(24)-C(25)       | 1.365(5)   |
| N(1)-C(15)  | 1.455(4) | C(25)-C(26)       | 1.352(5)   |
| N(2)-C(7)   | 1.319(5) | C(26)-C(27)       | 1.393(4)   |
| N(2)-C(6)   | 1.349(5) |                   |            |
| N(3)-C(14)  | 1.369(4) | C(16)-Pt(1)-C(22) | 90.01(14)  |
| N(3)-C(8)   | 1.383(5) | C(16)-Pt(1)-N(2)  | 177.20(15) |
| N(3)-C(15)  | 1.448(4) | C(22)-Pt(1)-N(2)  | 90.72(13)  |
| N(4)-C(14)  | 1.337(4) | C(16)-Pt(1)-N(4)  | 91.57(12)  |
| N(4)-C(13)  | 1.346(4) | C(22)-Pt(1)-N(4)  | 177.04(14) |
| C(1)-C(2)   | 1.348(6) | N(2)-Pt(1)-N(4)   | 87.82(11)  |
| C(2)-C(3)   | 1.409(6) | C(7)-N(1)-C(1)    | 108.0(4)   |
| C(3)-C(4)   | 1.386(6) | C(7)-N(1)-C(15)   | 126.7(4)   |
| C(3)-C(7)   | 1.414(5) | C(1)-N(1)-C(15)   | 123.7(4)   |
| C(4)-C(5)   | 1.365(5) | C(7)-N(2)-C(6)    | 114.7(3)   |
| C(5)-C(6)   | 1.381(5) | C(7)-N(2)-Pt(1)   | 127.3(3)   |
| C(8)-C(9)   | 1.355(5) | C(6)-N(2)-Pt(1)   | 117.9(3)   |
| C(9)-C(10)  | 1.426(6) | C(14)-N(3)-C(8)   | 108.0(3)   |
| C(10)-C(11) | 1.378(5) | C(14)-N(3)-C(15)  | 127.7(3)   |
| C(10)-C(14) | 1.431(5) | C(8)-N(3)-C(15)   | 123.4(4)   |
| C(11)-C(12) | 1.352(5) | C(14)-N(4)-C(13)  | 115.4(3)   |
| C(12)-C(13) | 1.390(5) | C(14)-N(4)-Pt(1)  | 125.0(2)   |
| C(16)-C(17) | 1.376(5) | C(13)-N(4)-Pt(1)  | 119.6(3)   |
| C(16)-C(21) | 1.400(5) | C(2)-C(1)-N(1)    | 110.3(4)   |
| C(17)-C(18) | 1.384(5) | C(1)-C(2)-C(3)    | 107.1(4)   |
| C(18)-C(19) | 1.365(6) | C(4)-C(3)-C(2)    | 136.3(5)   |

|                   |          |                   |          |
|-------------------|----------|-------------------|----------|
| C(4)-C(3)-C(7)    | 116.3(4) | N(3)-C(14)-C(10)  | 107.9(4) |
| C(2)-C(3)-C(7)    | 107.3(4) | N(3)-C(15)-N(1)   | 111.6(3) |
| C(5)-C(4)-C(3)    | 118.5(5) | C(17)-C(16)-C(21) | 114.4(4) |
| C(4)-C(5)-C(6)    | 120.4(5) | C(17)-C(16)-Pt(1) | 123.5(3) |
| N(2)-C(6)-C(5)    | 123.7(4) | C(21)-C(16)-Pt(1) | 122.0(3) |
| N(2)-C(7)-N(1)    | 126.3(4) | C(16)-C(17)-C(18) | 123.5(4) |
| N(2)-C(7)-C(3)    | 126.5(4) | C(19)-C(18)-C(17) | 119.4(5) |
| N(1)-C(7)-C(3)    | 107.2(4) | C(20)-C(19)-C(18) | 119.5(5) |
| C(9)-C(8)-N(3)    | 110.7(4) | C(19)-C(20)-C(21) | 120.4(5) |
| C(8)-C(9)-C(10)   | 107.0(4) | C(20)-C(21)-C(16) | 122.8(4) |
| C(11)-C(10)-C(9)  | 136.2(4) | C(23)-C(22)-C(27) | 114.0(3) |
| C(11)-C(10)-C(14) | 117.5(4) | C(23)-C(22)-Pt(1) | 127.0(3) |
| C(9)-C(10)-C(14)  | 106.3(4) | C(27)-C(22)-Pt(1) | 119.0(3) |
| C(12)-C(11)-C(10) | 118.8(4) | C(22)-C(23)-C(24) | 123.1(4) |
| C(11)-C(12)-C(13) | 120.5(4) | C(25)-C(24)-C(23) | 120.7(4) |
| N(4)-C(13)-C(12)  | 123.6(4) | C(26)-C(25)-C(24) | 118.7(4) |
| N(4)-C(14)-N(3)   | 128.0(3) | C(25)-C(26)-C(27) | 120.2(4) |
| N(4)-C(14)-C(10)  | 124.2(4) | C(26)-C(27)-C(22) | 123.2(4) |

Table 4. Anisotropic displacement parameters ( $\text{\AA}^2 \times 10^3$ ) for compound **1**. The anisotropic displacement factor exponent takes the form:  $-2\pi^2 [h^2 a^{*2} U^{11} + \dots + 2 h k a^* b^* U^{12}]$

|       | $U^{11}$ | $U^{22}$ | $U^{33}$ | $U^{23}$ | $U^{13}$ | $U^{12}$ |
|-------|----------|----------|----------|----------|----------|----------|
| Pt(1) | 33(1)    | 41(1)    | 43(1)    | -3(1)    | 3(1)     | -1(1)    |
| N(1)  | 48(2)    | 58(3)    | 40(2)    | -8(2)    | -2(2)    | 2(2)     |
| N(2)  | 37(2)    | 43(2)    | 45(2)    | -2(2)    | 5(2)     | 1(2)     |
| N(3)  | 47(2)    | 46(2)    | 52(2)    | 7(2)     | 8(2)     | -1(2)    |
| N(4)  | 35(2)    | 43(2)    | 49(2)    | -4(2)    | 4(2)     | -1(2)    |
| C(1)  | 61(3)    | 83(4)    | 55(4)    | -2(3)    | 0(3)     | 1(3)     |
| C(2)  | 60(3)    | 86(4)    | 55(3)    | -23(3)   | -2(2)    | -6(3)    |
| C(3)  | 47(2)    | 55(3)    | 62(4)    | -15(3)   | 9(2)     | -1(2)    |
| C(4)  | 57(3)    | 58(3)    | 85(4)    | -31(3)   | 16(3)    | -9(3)    |
| C(5)  | 64(3)    | 47(3)    | 76(4)    | -4(3)    | 12(3)    | -9(2)    |
| C(6)  | 52(2)    | 53(3)    | 52(3)    | -6(3)    | 5(2)     | -3(2)    |

|       |       |       |       |        |       |        |
|-------|-------|-------|-------|--------|-------|--------|
| C(7)  | 34(2) | 42(3) | 51(3) | -7(2)  | 8(2)  | -2(2)  |
| C(8)  | 83(3) | 62(3) | 59(4) | 6(3)   | 26(3) | -7(3)  |
| C(9)  | 75(3) | 58(3) | 88(4) | 6(3)   | 39(3) | -9(3)  |
| C(10) | 49(2) | 40(3) | 72(4) | -7(2)  | 26(3) | -5(2)  |
| C(11) | 43(2) | 70(4) | 88(4) | -16(3) | 22(3) | -7(2)  |
| C(12) | 34(2) | 75(3) | 88(4) | -10(3) | 2(2)  | 6(2)   |
| C(13) | 43(2) | 61(3) | 62(3) | -2(3)  | 4(2)  | 3(2)   |
| C(14) | 49(2) | 33(2) | 50(3) | -9(2)  | 13(2) | -5(2)  |
| C(15) | 50(2) | 49(3) | 54(3) | 4(2)   | 2(2)  | 5(2)   |
| C(16) | 33(2) | 46(3) | 43(3) | 2(2)   | 8(2)  | -3(2)  |
| C(17) | 61(3) | 56(3) | 59(3) | -1(3)  | 4(2)  | 7(2)   |
| C(18) | 85(3) | 44(3) | 90(4) | -11(3) | 22(3) | 4(3)   |
| C(19) | 67(3) | 72(4) | 92(5) | -36(3) | 19(3) | -15(3) |
| C(20) | 48(2) | 91(4) | 58(3) | -24(3) | 2(2)  | -7(3)  |
| C(21) | 50(2) | 50(3) | 49(3) | -8(2)  | 2(2)  | 0(2)   |
| C(22) | 40(2) | 33(2) | 41(2) | -1(2)  | 2(2)  | 1(2)   |
| C(23) | 43(2) | 65(3) | 47(3) | -1(2)  | 2(2)  | 1(2)   |
| C(24) | 57(3) | 73(4) | 48(3) | 3(2)   | 14(2) | -2(2)  |
| C(25) | 37(2) | 59(3) | 70(4) | -3(3)  | 15(2) | -1(2)  |
| C(26) | 37(2) | 70(3) | 63(3) | -9(3)  | -3(2) | 3(2)   |
| C(27) | 40(2) | 52(3) | 41(3) | 2(2)   | 3(2)  | 3(2)   |

Table 5. Hydrogen coordinates ( $\times 10^4$ ) and isotropic displacement parameters ( $\text{\AA}^2 \times 10^3$ ) for compound **1**.

|       | x    | y    | z     | U(eq) |
|-------|------|------|-------|-------|
| H(1A) | 5767 | 8172 | -2314 | 80    |
| H(2A) | 5492 | 6155 | -2393 | 81    |
| H(4A) | 5808 | 4422 | -1224 | 79    |
| H(5A) | 6346 | 4263 | 9     | 75    |
| H(6A) | 6741 | 5823 | 703   | 63    |
| H(8A) | 7884 | 9631 | -2086 | 81    |
| H(9A) | 9853 | 9336 | -1884 | 86    |

|        |       |       |       |    |
|--------|-------|-------|-------|----|
| H(11A) | 11160 | 8657  | -518  | 79 |
| H(12A) | 10942 | 8110  | 668   | 79 |
| H(13A) | 9233  | 8031  | 1106  | 66 |
| H(15A) | 6205  | 9643  | -1313 | 61 |
| H(15B) | 6351  | 9249  | -489  | 61 |
| H(17A) | 6328  | 10777 | 886   | 70 |
| H(18A) | 6788  | 12190 | 1704  | 87 |
| H(19A) | 7919  | 11819 | 2739  | 92 |
| H(20A) | 8567  | 10039 | 2943  | 79 |
| H(21A) | 8143  | 8650  | 2117  | 60 |
| H(23A) | 5654  | 8206  | 2135  | 63 |
| H(24A) | 3906  | 7941  | 2482  | 71 |
| H(25A) | 2459  | 7780  | 1613  | 66 |
| H(26A) | 2785  | 7885  | 392   | 68 |
| H(27A) | 4546  | 8056  | 39    | 53 |

---

### S3 X-ray structure data for compound 2.

Diagrams showing the structure of compound 2 with labeling schemes:

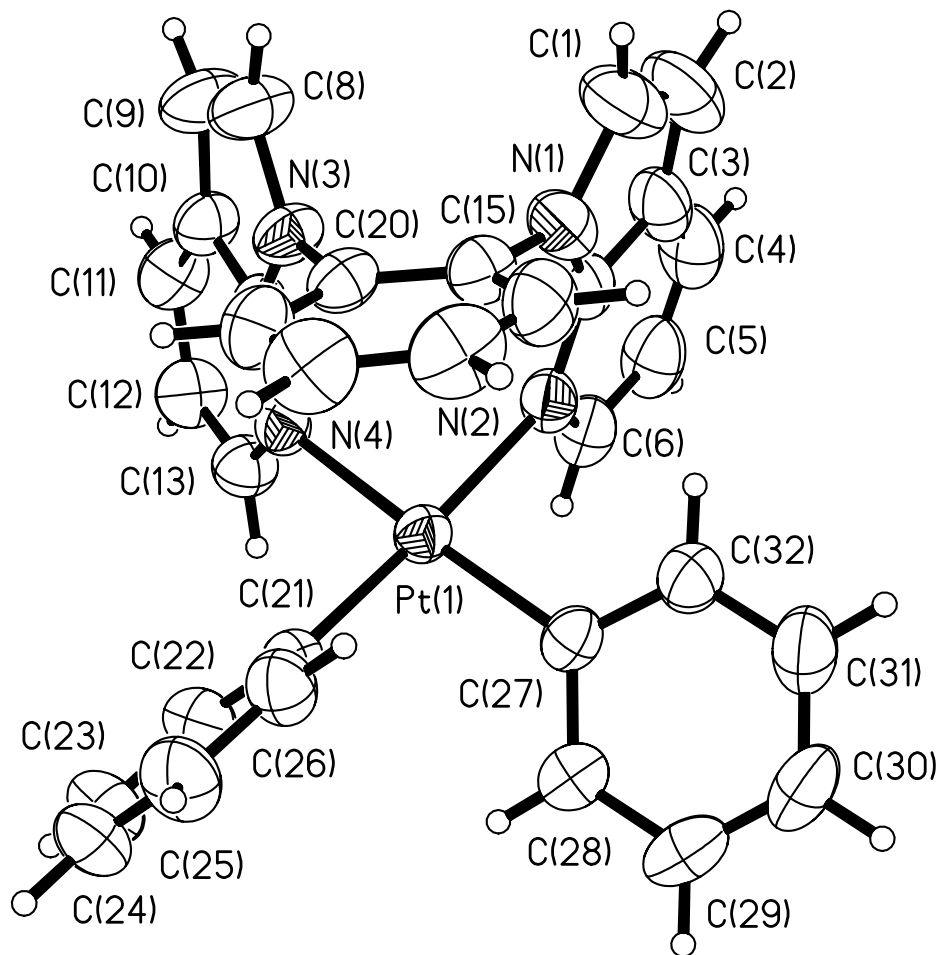

Table 1. Crystal data and structure refinement for compound **2**.

|                                   |                                                   |                  |
|-----------------------------------|---------------------------------------------------|------------------|
| Identification code               | <b>2</b>                                          |                  |
| Empirical formula                 | C <sub>32</sub> H <sub>24</sub> N <sub>4</sub> Pt |                  |
| Formula weight                    | 659.64                                            |                  |
| Temperature                       | 294(2) K                                          |                  |
| Wavelength                        | 0.71073 Å                                         |                  |
| Crystal system                    | Monoclinic                                        |                  |
| Space group                       | P2(1)/c                                           |                  |
| Unit cell dimensions              | a = 15.404(3) Å                                   | α = 90°.         |
|                                   | b = 11.527(2) Å                                   | β = 112.390(4)°. |
|                                   | c = 15.536(3) Å                                   | γ = 90°.         |
| Volume                            | 2550.7(8) Å <sup>3</sup>                          |                  |
| Z                                 | 4                                                 |                  |
| Density (calculated)              | 1.718 Mg/m <sup>3</sup>                           |                  |
| Absorption coefficient            | 5.530 mm <sup>-1</sup>                            |                  |
| F(000)                            | 1288                                              |                  |
| Crystal size                      | 0.20 x 0.20 x 0.10 mm <sup>3</sup>                |                  |
| Theta range for data collection   | 2.27 to 27.00°.                                   |                  |
| Index ranges                      | -17 ≤ h ≤ 19, -14 ≤ k ≤ 14, -17 ≤ l ≤ 19          |                  |
| Reflections collected             | 17073                                             |                  |
| Independent reflections           | 5546 [R(int) = 0.0174]                            |                  |
| Completeness to theta = 27.00°    | 99.6 %                                            |                  |
| Absorption correction             | Semi-empirical from equivalents                   |                  |
| Max. and min. transmission        | 0.6078 and 0.4043                                 |                  |
| Refinement method                 | Full-matrix least-squares on F <sup>2</sup>       |                  |
| Data / restraints / parameters    | 5546 / 0 / 334                                    |                  |
| Goodness-of-fit on F <sup>2</sup> | 0.925                                             |                  |
| Final R indices [I > 2σ(I)]       | R1 = 0.0188, wR2 = 0.0340                         |                  |
| R indices (all data)              | R1 = 0.0316, wR2 = 0.0363                         |                  |
| Largest diff. peak and hole       | 0.821 and -0.576 e.Å <sup>-3</sup>                |                  |



Table 2. Atomic coordinates ( $\times 10^4$ ) and equivalent isotropic displacement parameters ( $\text{\AA}^2 \times 10^3$ ) for compound **2**.  $U(\text{eq})$  is defined as one third of the trace of the orthogonalized  $U^{ij}$  tensor.

|       | x       | y        | z       | $U(\text{eq})$ |
|-------|---------|----------|---------|----------------|
| Pt(1) | 2895(1) | 1149(1)  | 1800(1) | 40(1)          |
| N(1)  | 1840(2) | 3927(2)  | 1426(2) | 55(1)          |
| N(2)  | 2999(2) | 2723(2)  | 2584(1) | 45(1)          |
| N(3)  | 2941(2) | 3378(2)  | 388(2)  | 48(1)          |
| N(4)  | 3958(2) | 1966(2)  | 1439(1) | 40(1)          |
| C(1)  | 1558(2) | 5075(3)  | 1427(3) | 76(1)          |
| C(2)  | 2040(3) | 5572(3)  | 2251(3) | 84(1)          |
| C(3)  | 2677(2) | 4749(3)  | 2819(2) | 61(1)          |
| C(4)  | 3354(3) | 4727(3)  | 3714(2) | 73(1)          |
| C(5)  | 3837(2) | 3723(3)  | 4029(2) | 68(1)          |
| C(6)  | 3647(2) | 2748(3)  | 3459(2) | 57(1)          |
| C(7)  | 2539(2) | 3718(2)  | 2283(2) | 47(1)          |
| C(8)  | 3087(2) | 4419(3)  | 22(2)   | 67(1)          |
| C(9)  | 4012(2) | 4663(3)  | 339(2)  | 70(1)          |
| C(10) | 4497(2) | 3726(2)  | 926(2)  | 50(1)          |
| C(11) | 5422(2) | 3438(3)  | 1439(2) | 60(1)          |
| C(12) | 5601(2) | 2413(3)  | 1919(2) | 58(1)          |
| C(13) | 4867(2) | 1712(3)  | 1913(2) | 52(1)          |
| C(14) | 3802(2) | 2940(2)  | 940(2)  | 41(1)          |
| C(15) | 1483(2) | 3170(2)  | 643(2)  | 48(1)          |
| C(16) | 571(2)  | 2768(3)  | 349(2)  | 63(1)          |
| C(17) | 223(2)  | 2039(3)  | -404(2) | 71(1)          |
| C(18) | 785(2)  | 1701(3)  | -870(2) | 70(1)          |
| C(19) | 1690(2) | 2123(3)  | -595(2) | 58(1)          |
| C(20) | 2035(2) | 2858(2)  | 154(2)  | 45(1)          |
| C(21) | 2852(2) | -272(2)  | 1048(2) | 42(1)          |
| C(22) | 3655(2) | -909(2)  | 1122(2) | 53(1)          |
| C(23) | 3613(2) | -1879(3) | 593(2)  | 63(1)          |
| C(24) | 2783(3) | -2252(3) | -48(2)  | 64(1)          |
| C(25) | 1981(2) | -1647(3) | -162(2) | 65(1)          |
| C(26) | 2015(2) | -676(3)  | 379(2)  | 55(1)          |

|       |         |          |         |       |
|-------|---------|----------|---------|-------|
| C(27) | 1973(2) | 444(2)   | 2273(2) | 43(1) |
| C(28) | 1963(2) | -728(3)  | 2497(2) | 50(1) |
| C(29) | 1344(2) | -1171(3) | 2873(2) | 61(1) |
| C(30) | 702(2)  | -464(3)  | 3033(2) | 66(1) |
| C(31) | 675(2)  | 673(3)   | 2809(2) | 66(1) |
| C(32) | 1299(2) | 1124(3)  | 2440(2) | 55(1) |

---

Table 3. Bond lengths [ $\text{\AA}$ ] and angles [ $^\circ$ ] for compound **2**.

|             |          |                   |           |
|-------------|----------|-------------------|-----------|
| Pt(1)-C(21) | 1.998(3) | C(15)-C(16)       | 1.381(4)  |
| Pt(1)-C(27) | 2.003(3) | C(15)-C(20)       | 1.386(3)  |
| Pt(1)-N(4)  | 2.141(2) | C(16)-C(17)       | 1.372(4)  |
| Pt(1)-N(2)  | 2.157(2) | C(17)-C(18)       | 1.379(4)  |
| N(1)-C(7)   | 1.378(4) | C(18)-C(19)       | 1.382(4)  |
| N(1)-C(1)   | 1.394(4) | C(19)-C(20)       | 1.373(4)  |
| N(1)-C(15)  | 1.426(3) | C(21)-C(26)       | 1.393(4)  |
| N(2)-C(7)   | 1.335(3) | C(21)-C(22)       | 1.405(4)  |
| N(2)-C(6)   | 1.346(3) | C(22)-C(23)       | 1.374(4)  |
| N(3)-C(14)  | 1.373(3) | C(23)-C(24)       | 1.356(4)  |
| N(3)-C(8)   | 1.381(3) | C(24)-C(25)       | 1.370(4)  |
| N(3)-C(20)  | 1.432(3) | C(25)-C(26)       | 1.390(4)  |
| N(4)-C(14)  | 1.333(3) | C(27)-C(28)       | 1.396(4)  |
| N(4)-C(13)  | 1.343(3) | C(27)-C(32)       | 1.403(4)  |
| C(1)-C(2)   | 1.340(4) | C(28)-C(29)       | 1.393(4)  |
| C(2)-C(3)   | 1.407(5) | C(29)-C(30)       | 1.374(4)  |
| C(3)-C(4)   | 1.385(4) | C(30)-C(31)       | 1.353(4)  |
| C(3)-C(7)   | 1.420(4) | C(31)-C(32)       | 1.392(4)  |
| C(4)-C(5)   | 1.362(4) |                   |           |
| C(5)-C(6)   | 1.390(4) | C(21)-Pt(1)-C(27) | 90.66(10) |
| C(8)-C(9)   | 1.349(4) | C(21)-Pt(1)-N(4)  | 93.81(9)  |
| C(9)-C(10)  | 1.428(4) | C(27)-Pt(1)-N(4)  | 174.03(8) |
| C(10)-C(11) | 1.382(4) | C(21)-Pt(1)-N(2)  | 176.82(9) |
| C(10)-C(14) | 1.409(3) | C(27)-Pt(1)-N(2)  | 92.52(9)  |
| C(11)-C(12) | 1.369(4) | N(4)-Pt(1)-N(2)   | 83.01(7)  |
| C(12)-C(13) | 1.387(4) | C(7)-N(1)-C(1)    | 107.1(3)  |

|                   |            |                   |          |
|-------------------|------------|-------------------|----------|
| C(7)-N(1)-C(15)   | 128.6(2)   | N(4)-C(14)-N(3)   | 126.2(2) |
| C(1)-N(1)-C(15)   | 124.2(3)   | N(4)-C(14)-C(10)  | 125.4(3) |
| C(7)-N(2)-C(6)    | 115.1(2)   | N(3)-C(14)-C(10)  | 108.3(2) |
| C(7)-N(2)-Pt(1)   | 127.55(18) | C(16)-C(15)-C(20) | 119.4(3) |
| C(6)-N(2)-Pt(1)   | 117.1(2)   | C(16)-C(15)-N(1)  | 120.1(3) |
| C(14)-N(3)-C(8)   | 107.8(2)   | C(20)-C(15)-N(1)  | 120.5(2) |
| C(14)-N(3)-C(20)  | 128.3(2)   | C(17)-C(16)-C(15) | 120.4(3) |
| C(8)-N(3)-C(20)   | 123.7(2)   | C(16)-C(17)-C(18) | 120.1(3) |
| C(14)-N(4)-C(13)  | 115.0(2)   | C(17)-C(18)-C(19) | 120.0(3) |
| C(14)-N(4)-Pt(1)  | 122.40(18) | C(20)-C(19)-C(18) | 119.9(3) |
| C(13)-N(4)-Pt(1)  | 120.11(18) | C(19)-C(20)-C(15) | 120.3(3) |
| C(2)-C(1)-N(1)    | 110.4(3)   | C(19)-C(20)-N(3)  | 119.9(2) |
| C(1)-C(2)-C(3)    | 108.1(3)   | C(15)-C(20)-N(3)  | 119.7(2) |
| C(4)-C(3)-C(2)    | 136.0(3)   | C(26)-C(21)-C(22) | 115.0(2) |
| C(4)-C(3)-C(7)    | 117.4(3)   | C(26)-C(21)-Pt(1) | 121.7(2) |
| C(2)-C(3)-C(7)    | 106.6(3)   | C(22)-C(21)-Pt(1) | 123.3(2) |
| C(5)-C(4)-C(3)    | 118.4(3)   | C(23)-C(22)-C(21) | 122.5(3) |
| C(4)-C(5)-C(6)    | 120.3(3)   | C(24)-C(23)-C(22) | 120.9(3) |
| N(2)-C(6)-C(5)    | 123.8(3)   | C(23)-C(24)-C(25) | 118.9(3) |
| N(2)-C(7)-N(1)    | 127.1(2)   | C(24)-C(25)-C(26) | 120.5(3) |
| N(2)-C(7)-C(3)    | 125.0(3)   | C(25)-C(26)-C(21) | 122.1(3) |
| N(1)-C(7)-C(3)    | 107.9(3)   | C(28)-C(27)-C(32) | 114.5(2) |
| C(9)-C(8)-N(3)    | 110.3(3)   | C(28)-C(27)-Pt(1) | 124.1(2) |
| C(8)-C(9)-C(10)   | 107.4(3)   | C(32)-C(27)-Pt(1) | 121.4(2) |
| C(11)-C(10)-C(14) | 117.4(3)   | C(29)-C(28)-C(27) | 122.2(3) |
| C(11)-C(10)-C(9)  | 136.4(3)   | C(30)-C(29)-C(28) | 120.9(3) |
| C(14)-C(10)-C(9)  | 106.3(3)   | C(31)-C(30)-C(29) | 118.8(3) |
| C(12)-C(11)-C(10) | 118.1(3)   | C(30)-C(31)-C(32) | 120.6(3) |
| C(11)-C(12)-C(13) | 120.4(3)   | C(31)-C(32)-C(27) | 123.0(3) |
| N(4)-C(13)-C(12)  | 123.6(3)   |                   |          |

Table 4. Anisotropic displacement parameters ( $\text{\AA}^2 \times 10^3$ ) for compound **2**. The anisotropic displacement factor exponent takes the form:  $-2\pi^2 [ h^2 a^{*2} U^{11} + \dots + 2 h k a^* b^* U^{12} ]$

---

|                 |                 |                 |                 |                 |                 |
|-----------------|-----------------|-----------------|-----------------|-----------------|-----------------|
| U <sup>11</sup> | U <sup>22</sup> | U <sup>33</sup> | U <sup>23</sup> | U <sup>13</sup> | U <sup>12</sup> |
|-----------------|-----------------|-----------------|-----------------|-----------------|-----------------|

---

---

|       |       |       |        |        |       |        |
|-------|-------|-------|--------|--------|-------|--------|
| Pt(1) | 43(1) | 38(1) | 41(1)  | -2(1)  | 18(1) | -4(1)  |
| N(1)  | 54(2) | 47(2) | 68(2)  | -6(1)  | 26(1) | 3(1)   |
| N(2)  | 48(2) | 44(1) | 49(1)  | -9(1)  | 25(1) | -9(1)  |
| N(3)  | 40(1) | 50(1) | 55(1)  | 12(1)  | 19(1) | -2(1)  |
| N(4)  | 39(1) | 40(1) | 45(1)  | -2(1)  | 20(1) | -2(1)  |
| C(1)  | 67(2) | 54(2) | 109(3) | 4(2)   | 34(2) | 16(2)  |
| C(2)  | 91(3) | 50(2) | 119(3) | -26(2) | 49(3) | 0(2)   |
| C(3)  | 66(2) | 49(2) | 79(2)  | -21(2) | 41(2) | -12(2) |
| C(4)  | 83(3) | 71(2) | 80(2)  | -35(2) | 46(2) | -27(2) |
| C(5)  | 74(2) | 80(3) | 55(2)  | -22(2) | 31(2) | -24(2) |
| C(6)  | 58(2) | 64(2) | 52(2)  | -6(2)  | 26(2) | -9(2)  |
| C(7)  | 48(2) | 45(2) | 58(2)  | -10(2) | 31(2) | -11(2) |
| C(8)  | 59(2) | 61(2) | 84(2)  | 28(2)  | 30(2) | 4(2)   |
| C(9)  | 58(2) | 60(2) | 96(2)  | 24(2)  | 33(2) | -9(2)  |
| C(10) | 44(2) | 52(2) | 58(2)  | 3(2)   | 23(1) | -7(2)  |
| C(11) | 44(2) | 66(2) | 69(2)  | -2(2)  | 22(2) | -17(2) |
| C(12) | 38(2) | 65(2) | 66(2)  | 2(2)   | 14(2) | -2(2)  |
| C(13) | 50(2) | 51(2) | 54(2)  | 4(1)   | 18(2) | 3(2)   |
| C(14) | 40(2) | 45(2) | 40(1)  | -1(1)  | 19(1) | -3(1)  |
| C(15) | 43(2) | 50(2) | 50(2)  | 2(1)   | 17(1) | -1(2)  |
| C(16) | 46(2) | 74(2) | 72(2)  | 1(2)   | 27(2) | 1(2)   |
| C(17) | 44(2) | 83(3) | 76(2)  | 2(2)   | 13(2) | -16(2) |
| C(18) | 62(2) | 80(2) | 53(2)  | -10(2) | 6(2)  | -14(2) |
| C(19) | 55(2) | 72(2) | 47(2)  | 1(2)   | 18(2) | -2(2)  |
| C(20) | 37(2) | 51(2) | 44(2)  | 11(1)  | 11(1) | 0(1)   |
| C(21) | 47(2) | 38(2) | 42(1)  | 1(1)   | 20(1) | -4(1)  |
| C(22) | 56(2) | 47(2) | 50(2)  | -1(1)  | 14(2) | 2(2)   |
| C(23) | 68(2) | 51(2) | 67(2)  | -7(2)  | 22(2) | 11(2)  |
| C(24) | 82(3) | 45(2) | 68(2)  | -13(2) | 32(2) | -1(2)  |
| C(25) | 64(2) | 61(2) | 68(2)  | -23(2) | 24(2) | -18(2) |
| C(26) | 53(2) | 54(2) | 62(2)  | -11(2) | 26(2) | -7(2)  |
| C(27) | 43(2) | 48(2) | 37(1)  | -2(1)  | 16(1) | -7(1)  |
| C(28) | 49(2) | 52(2) | 47(2)  | 4(1)   | 17(1) | -5(2)  |
| C(29) | 66(2) | 63(2) | 48(2)  | 13(2)  | 16(2) | -17(2) |
| C(30) | 68(2) | 83(3) | 57(2)  | -4(2)  | 35(2) | -27(2) |

|       |       |       |       |        |       |        |
|-------|-------|-------|-------|--------|-------|--------|
| C(31) | 63(2) | 75(2) | 73(2) | -15(2) | 41(2) | -11(2) |
| C(32) | 61(2) | 51(2) | 63(2) | -5(2)  | 34(2) | -7(2)  |

Table 5. Hydrogen coordinates ( $\times 10^4$ ) and isotropic displacement parameters ( $\text{\AA}^2 \times 10^3$ ) for compound 2.

|        | x    | y     | z     | U(eq) |
|--------|------|-------|-------|-------|
| H(1A)  | 1100 | 5444  | 927   | 92    |
| H(2A)  | 1967 | 6329  | 2419  | 101   |
| H(4A)  | 3476 | 5382  | 4091  | 88    |
| H(5A)  | 4296 | 3689  | 4627  | 81    |
| H(6A)  | 3987 | 2075  | 3697  | 68    |
| H(8A)  | 2614 | 4885  | -383  | 81    |
| H(9A)  | 4284 | 5320  | 200   | 84    |
| H(11A) | 5909 | 3927  | 1457  | 71    |
| H(12A) | 6218 | 2185  | 2251  | 70    |
| H(13A) | 5012 | 1028  | 2256  | 63    |
| H(16A) | 191  | 2991  | 663   | 75    |
| H(17A) | -392 | 1774  | -600  | 85    |
| H(18A) | 555  | 1189  | -1368 | 84    |
| H(19A) | 2064 | 1910  | -918  | 70    |
| H(22A) | 4237 | -665  | 1544  | 63    |
| H(23A) | 4160 | -2285 | 676   | 76    |
| H(24A) | 2760 | -2908 | -405  | 77    |
| H(25A) | 1410 | -1889 | -606  | 78    |
| H(26A) | 1460 | -282  | 292   | 66    |
| H(28A) | 2385 | -1229 | 2391  | 60    |
| H(29A) | 1364 | -1955 | 3018  | 73    |
| H(30A) | 294  | -762  | 3290  | 79    |
| H(31A) | 236  | 1159  | 2902  | 79    |
| H(32A) | 1266 | 1911  | 2299  | 66    |

### S4 X-ray structure data for compound 3.

Diagrams showing the structure of compound 3 with labeling schemes:

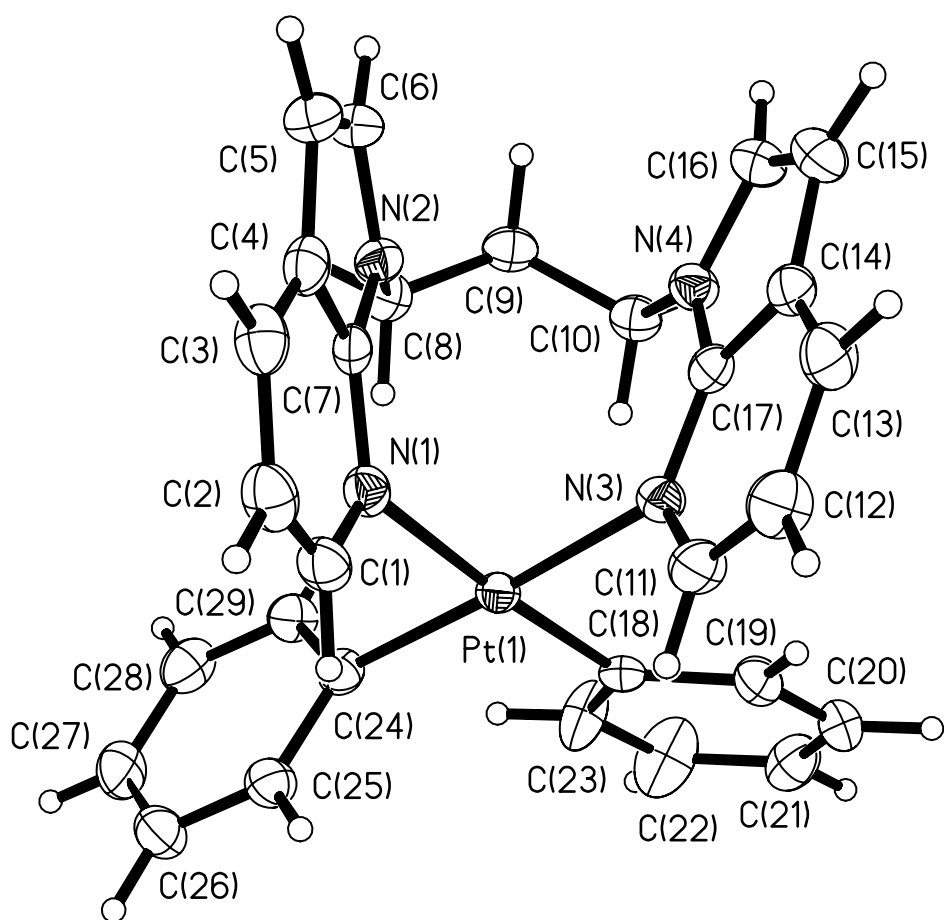

Table 1. Crystal data and structure refinement for compound **3**.

|                                   |                                                   |                   |
|-----------------------------------|---------------------------------------------------|-------------------|
| Identification code               | <b>3</b>                                          |                   |
| Empirical formula                 | C <sub>29</sub> H <sub>26</sub> N <sub>4</sub> Pt |                   |
| Formula weight                    | 625.63                                            |                   |
| Temperature                       | 180(2) K                                          |                   |
| Wavelength                        | 0.71073 Å                                         |                   |
| Crystal system                    | Triclinic                                         |                   |
| Space group                       | P-1                                               |                   |
| Unit cell dimensions              | a = 8.27880(10) Å                                 | α = 73.3860(10)°. |
|                                   | b = 10.28780(10) Å                                | β = 89.3110(10)°. |
|                                   | c = 15.4456(3) Å                                  | γ = 69.1100(10)°. |
| Volume                            | 1171.77(3) Å <sup>3</sup>                         |                   |
| Z                                 | 2                                                 |                   |
| Density (calculated)              | 1.773 Mg/m <sup>3</sup>                           |                   |
| Absorption coefficient            | 6.013 mm <sup>-1</sup>                            |                   |
| F(000)                            | 612                                               |                   |
| Crystal size                      | 0.20 x 0.20 x 0.20 mm <sup>3</sup>                |                   |
| Theta range for data collection   | 2.22 to 26.00°.                                   |                   |
| Index ranges                      | -10 ≤ h ≤ 10, -12 ≤ k ≤ 12, -9 ≤ l ≤ 19           |                   |
| Reflections collected             | 10077                                             |                   |
| Independent reflections           | 4573 [R(int) = 0.0209]                            |                   |
| Completeness to theta = 26.00°    | 99.5 %                                            |                   |
| Absorption correction             | Semi-empirical from equivalents                   |                   |
| Max. and min. transmission        | 0.3793 and 0.3793                                 |                   |
| Refinement method                 | Full-matrix least-squares on F <sup>2</sup>       |                   |
| Data / restraints / parameters    | 4573 / 0 / 307                                    |                   |
| Goodness-of-fit on F <sup>2</sup> | 1.025                                             |                   |
| Final R indices [I > 2σ(I)]       | R1 = 0.0200, wR2 = 0.0449                         |                   |
| R indices (all data)              | R1 = 0.0226, wR2 = 0.0461                         |                   |
| Largest diff. peak and hole       | 1.314 and -0.662 e.Å <sup>-3</sup>                |                   |

Table 2. Atomic coordinates ( $\times 10^4$ ) and equivalent isotropic displacement parameters ( $\text{\AA}^2 \times 10^3$ ) for compound **3**.  $U(\text{eq})$  is defined as one third of the trace of the orthogonalized  $U^{ij}$  tensor.

|       | x        | y        | z        | $U(\text{eq})$ |
|-------|----------|----------|----------|----------------|
| Pt(1) | 1751(1)  | 1278(1)  | 7498(1)  | 20(1)          |
| N(1)  | 3619(4)  | 118(3)   | 8669(2)  | 23(1)          |
| N(2)  | 6078(3)  | 680(3)   | 8038(2)  | 23(1)          |
| N(3)  | 3180(3)  | -650(3)  | 7109(2)  | 23(1)          |
| N(4)  | 5349(4)  | 65(3)    | 6232(2)  | 25(1)          |
| C(1)  | 3205(5)  | -780(4)  | 9382(2)  | 27(1)          |
| C(2)  | 4423(5)  | -1916(4) | 10044(2) | 31(1)          |
| C(3)  | 6181(5)  | -2200(4) | 9998(2)  | 30(1)          |
| C(4)  | 6660(4)  | -1290(4) | 9284(2)  | 26(1)          |
| C(5)  | 8258(4)  | -1165(4) | 8993(2)  | 30(1)          |
| C(6)  | 7853(4)  | 23(4)    | 8257(2)  | 28(1)          |
| C(7)  | 5329(4)  | -128(4)  | 8658(2)  | 22(1)          |
| C(8)  | 5237(4)  | 2170(4)  | 7431(2)  | 25(1)          |
| C(9)  | 5551(4)  | 2319(4)  | 6441(2)  | 26(1)          |
| C(10) | 4629(4)  | 1653(4)  | 5958(2)  | 25(1)          |
| C(11) | 2797(5)  | -1839(4) | 7511(2)  | 29(1)          |
| C(12) | 3826(5)  | -3245(4) | 7558(3)  | 34(1)          |
| C(13) | 5399(5)  | -3529(4) | 7173(2)  | 33(1)          |
| C(14) | 5830(4)  | -2347(4) | 6732(2)  | 26(1)          |
| C(15) | 7243(5)  | -2156(4) | 6249(2)  | 32(1)          |
| C(16) | 6905(5)  | -706(4)  | 5957(2)  | 31(1)          |
| C(17) | 4664(4)  | -928(4)  | 6705(2)  | 23(1)          |
| C(18) | 96(4)    | 2255(4)  | 6357(2)  | 22(1)          |
| C(19) | -4(4)    | 1483(4)  | 5759(2)  | 30(1)          |
| C(20) | -1051(5) | 2147(4)  | 4930(2)  | 35(1)          |
| C(21) | -2042(5) | 3598(4)  | 4664(2)  | 36(1)          |
| C(22) | -1986(6) | 4399(5)  | 5242(3)  | 51(1)          |
| C(23) | -947(5)  | 3742(4)  | 6060(3)  | 39(1)          |
| C(24) | 552(4)   | 2891(4)  | 8030(2)  | 23(1)          |
| C(25) | -535(4)  | 2733(4)  | 8719(2)  | 28(1)          |
| C(26) | -1306(5) | 3808(4)  | 9134(2)  | 33(1)          |



|       |          |         |         |       |
|-------|----------|---------|---------|-------|
| C(27) | -1003(5) | 5095(4) | 8871(3) | 36(1) |
| C(28) | 56(5)    | 5298(4) | 8187(3) | 34(1) |
| C(29) | 809(4)   | 4224(4) | 7777(2) | 26(1) |

Table 3. Bond lengths [ $\text{\AA}$ ] and angles [ $^\circ$ ] for compound **3**.

|             |          |              |          |
|-------------|----------|--------------|----------|
| Pt(1)-C(24) | 2.000(3) | C(9)-H(9A)   | 0.9900   |
| Pt(1)-C(18) | 2.014(3) | C(9)-H(9B)   | 0.9900   |
| Pt(1)-N(1)  | 2.146(3) | C(10)-H(10A) | 0.9900   |
| Pt(1)-N(3)  | 2.164(3) | C(10)-H(10B) | 0.9900   |
| N(1)-C(7)   | 1.347(4) | C(11)-C(12)  | 1.374(5) |
| N(1)-C(1)   | 1.349(4) | C(11)-H(11A) | 0.9500   |
| N(2)-C(7)   | 1.375(4) | C(12)-C(13)  | 1.394(5) |
| N(2)-C(6)   | 1.380(4) | C(12)-H(12A) | 0.9500   |
| N(2)-C(8)   | 1.464(4) | C(13)-C(14)  | 1.379(5) |
| N(3)-C(17)  | 1.346(4) | C(13)-H(13A) | 0.9500   |
| N(3)-C(11)  | 1.349(4) | C(14)-C(15)  | 1.422(5) |
| N(4)-C(17)  | 1.370(4) | C(14)-C(17)  | 1.423(5) |
| N(4)-C(16)  | 1.385(4) | C(15)-C(16)  | 1.352(5) |
| N(4)-C(10)  | 1.455(4) | C(15)-H(15A) | 0.9500   |
| C(1)-C(2)   | 1.389(5) | C(16)-H(16A) | 0.9500   |
| C(1)-H(1A)  | 0.9500   | C(18)-C(19)  | 1.400(5) |
| C(2)-C(3)   | 1.384(5) | C(18)-C(23)  | 1.401(5) |
| C(2)-H(2A)  | 0.9500   | C(19)-C(20)  | 1.401(5) |
| C(3)-C(4)   | 1.384(5) | C(19)-H(19A) | 0.9500   |
| C(3)-H(3A)  | 0.9500   | C(20)-C(21)  | 1.362(5) |
| C(4)-C(7)   | 1.415(4) | C(20)-H(20A) | 0.9500   |
| C(4)-C(5)   | 1.429(5) | C(21)-C(22)  | 1.388(6) |
| C(5)-C(6)   | 1.350(5) | C(21)-H(21A) | 0.9500   |
| C(5)-H(5A)  | 0.9500   | C(22)-C(23)  | 1.385(5) |
| C(6)-H(6A)  | 0.9500   | C(22)-H(22A) | 0.9500   |
| C(8)-C(9)   | 1.522(5) | C(23)-H(23A) | 0.9500   |
| C(8)-H(8A)  | 0.9900   | C(24)-C(25)  | 1.396(5) |
| C(8)-H(8B)  | 0.9900   | C(24)-C(29)  | 1.406(5) |
| C(9)-C(10)  | 1.513(5) | C(25)-C(26)  | 1.391(5) |

|                   |            |                     |          |
|-------------------|------------|---------------------|----------|
| C(25)-H(25A)      | 0.9500     | C(3)-C(4)-C(7)      | 118.2(3) |
| C(26)-C(27)       | 1.381(5)   | C(3)-C(4)-C(5)      | 135.8(3) |
| C(26)-H(26A)      | 0.9500     | C(7)-C(4)-C(5)      | 106.0(3) |
| C(27)-C(28)       | 1.382(5)   | C(6)-C(5)-C(4)      | 107.2(3) |
| C(27)-H(27A)      | 0.9500     | C(6)-C(5)-H(5A)     | 126.4    |
| C(28)-C(29)       | 1.382(5)   | C(4)-C(5)-H(5A)     | 126.4    |
| C(28)-H(28A)      | 0.9500     | C(5)-C(6)-N(2)      | 110.9(3) |
| C(29)-H(29A)      | 0.9500     | C(5)-C(6)-H(6A)     | 124.5    |
|                   |            | N(2)-C(6)-H(6A)     | 124.5    |
| C(24)-Pt(1)-C(18) | 92.56(13)  | N(1)-C(7)-N(2)      | 126.3(3) |
| C(24)-Pt(1)-N(1)  | 91.61(11)  | N(1)-C(7)-C(4)      | 125.1(3) |
| C(18)-Pt(1)-N(1)  | 175.82(11) | N(2)-C(7)-C(4)      | 108.6(3) |
| C(24)-Pt(1)-N(3)  | 172.24(11) | N(2)-C(8)-C(9)      | 113.5(3) |
| C(18)-Pt(1)-N(3)  | 94.62(12)  | N(2)-C(8)-H(8A)     | 108.9    |
| N(1)-Pt(1)-N(3)   | 81.24(10)  | C(9)-C(8)-H(8A)     | 108.9    |
| C(7)-N(1)-C(1)    | 114.8(3)   | N(2)-C(8)-H(8B)     | 108.9    |
| C(7)-N(1)-Pt(1)   | 124.2(2)   | C(9)-C(8)-H(8B)     | 108.9    |
| C(1)-N(1)-Pt(1)   | 118.0(2)   | H(8A)-C(8)-H(8B)    | 107.7    |
| C(7)-N(2)-C(6)    | 107.3(3)   | C(10)-C(9)-C(8)     | 116.1(3) |
| C(7)-N(2)-C(8)    | 127.7(3)   | C(10)-C(9)-H(9A)    | 108.3    |
| C(6)-N(2)-C(8)    | 122.8(3)   | C(8)-C(9)-H(9A)     | 108.3    |
| C(17)-N(3)-C(11)  | 114.4(3)   | C(10)-C(9)-H(9B)    | 108.3    |
| C(17)-N(3)-Pt(1)  | 127.9(2)   | C(8)-C(9)-H(9B)     | 108.3    |
| C(11)-N(3)-Pt(1)  | 115.5(2)   | H(9A)-C(9)-H(9B)    | 107.4    |
| C(17)-N(4)-C(16)  | 107.4(3)   | N(4)-C(10)-C(9)     | 114.2(3) |
| C(17)-N(4)-C(10)  | 130.3(3)   | N(4)-C(10)-H(10A)   | 108.7    |
| C(16)-N(4)-C(10)  | 122.1(3)   | C(9)-C(10)-H(10A)   | 108.7    |
| N(1)-C(1)-C(2)    | 123.8(3)   | N(4)-C(10)-H(10B)   | 108.7    |
| N(1)-C(1)-H(1A)   | 118.1      | C(9)-C(10)-H(10B)   | 108.7    |
| C(2)-C(1)-H(1A)   | 118.1      | H(10A)-C(10)-H(10B) | 107.6    |
| C(3)-C(2)-C(1)    | 120.7(3)   | N(3)-C(11)-C(12)    | 124.9(3) |
| C(3)-C(2)-H(2A)   | 119.7      | N(3)-C(11)-H(11A)   | 117.6    |
| C(1)-C(2)-H(2A)   | 119.7      | C(12)-C(11)-H(11A)  | 117.6    |
| C(2)-C(3)-C(4)    | 117.3(3)   | C(11)-C(12)-C(13)   | 120.2(3) |
| C(2)-C(3)-H(3A)   | 121.3      | C(11)-C(12)-H(12A)  | 119.9    |
| C(4)-C(3)-H(3A)   | 121.3      | C(13)-C(12)-H(12A)  | 119.9    |

|                    |          |                    |          |
|--------------------|----------|--------------------|----------|
| C(14)-C(13)-C(12)  | 117.2(3) | C(22)-C(21)-H(21A) | 121.1    |
| C(14)-C(13)-H(13A) | 121.4    | C(23)-C(22)-C(21)  | 121.0(4) |
| C(12)-C(13)-H(13A) | 121.4    | C(23)-C(22)-H(22A) | 119.5    |
| C(13)-C(14)-C(15)  | 135.0(3) | C(21)-C(22)-H(22A) | 119.5    |
| C(13)-C(14)-C(17)  | 118.5(3) | C(22)-C(23)-C(18)  | 122.9(4) |
| C(15)-C(14)-C(17)  | 106.6(3) | C(22)-C(23)-H(23A) | 118.5    |
| C(16)-C(15)-C(14)  | 106.8(3) | C(18)-C(23)-H(23A) | 118.5    |
| C(16)-C(15)-H(15A) | 126.6    | C(25)-C(24)-C(29)  | 115.4(3) |
| C(14)-C(15)-H(15A) | 126.6    | C(25)-C(24)-Pt(1)  | 121.7(2) |
| C(15)-C(16)-N(4)   | 111.1(3) | C(29)-C(24)-Pt(1)  | 122.9(2) |
| C(15)-C(16)-H(16A) | 124.5    | C(26)-C(25)-C(24)  | 122.7(3) |
| N(4)-C(16)-H(16A)  | 124.5    | C(26)-C(25)-H(25A) | 118.6    |
| N(3)-C(17)-N(4)    | 127.1(3) | C(24)-C(25)-H(25A) | 118.6    |
| N(3)-C(17)-C(14)   | 124.7(3) | C(27)-C(26)-C(25)  | 120.0(3) |
| N(4)-C(17)-C(14)   | 108.2(3) | C(27)-C(26)-H(26A) | 120.0    |
| C(19)-C(18)-C(23)  | 114.4(3) | C(25)-C(26)-H(26A) | 120.0    |
| C(19)-C(18)-Pt(1)  | 121.1(3) | C(26)-C(27)-C(28)  | 119.1(3) |
| C(23)-C(18)-Pt(1)  | 124.4(3) | C(26)-C(27)-H(27A) | 120.5    |
| C(18)-C(19)-C(20)  | 122.7(3) | C(28)-C(27)-H(27A) | 120.5    |
| C(18)-C(19)-H(19A) | 118.7    | C(29)-C(28)-C(27)  | 120.4(3) |
| C(20)-C(19)-H(19A) | 118.7    | C(29)-C(28)-H(28A) | 119.8    |
| C(21)-C(20)-C(19)  | 121.2(3) | C(27)-C(28)-H(28A) | 119.8    |
| C(21)-C(20)-H(20A) | 119.4    | C(28)-C(29)-C(24)  | 122.4(3) |
| C(19)-C(20)-H(20A) | 119.4    | C(28)-C(29)-H(29A) | 118.8    |
| C(20)-C(21)-C(22)  | 117.9(3) | C(24)-C(29)-H(29A) | 118.8    |
| C(20)-C(21)-H(21A) | 121.1    |                    |          |

Table 4. Anisotropic displacement parameters ( $\text{\AA}^2 \times 10^3$ ) for compound **3**. The anisotropic displacement factor exponent takes the form:  $-2\pi^2 [ h^2 a^{*2} U^{11} + \dots + 2 h k a^* b^* U^{12} ]$

|       | $U^{11}$ | $U^{22}$ | $U^{33}$ | $U^{23}$ | $U^{13}$ | $U^{12}$ |
|-------|----------|----------|----------|----------|----------|----------|
| Pt(1) | 18(1)    | 20(1)    | 23(1)    | -8(1)    | 4(1)     | -8(1)    |
| N(1)  | 25(1)    | 23(2)    | 24(1)    | -10(1)   | 4(1)     | -9(1)    |
| N(2)  | 22(1)    | 26(2)    | 24(1)    | -8(1)    | 3(1)     | -12(1)   |

|       |       |       |       |        |        |        |
|-------|-------|-------|-------|--------|--------|--------|
| N(3)  | 20(1) | 22(2) | 26(1) | -9(1)  | 4(1)   | -7(1)  |
| N(4)  | 24(1) | 22(2) | 29(2) | -10(1) | 6(1)   | -9(1)  |
| C(1)  | 31(2) | 30(2) | 26(2) | -10(1) | 9(1)   | -16(2) |
| C(2)  | 43(2) | 29(2) | 24(2) | -8(1)  | 9(2)   | -18(2) |
| C(3)  | 38(2) | 24(2) | 25(2) | -9(1)  | -1(2)  | -7(2)  |
| C(4)  | 30(2) | 23(2) | 26(2) | -12(1) | -1(1)  | -7(2)  |
| C(5)  | 21(2) | 33(2) | 33(2) | -11(2) | -1(1)  | -7(2)  |
| C(6)  | 19(2) | 34(2) | 33(2) | -13(2) | 6(1)   | -10(2) |
| C(7)  | 24(2) | 24(2) | 20(2) | -12(1) | 2(1)   | -9(1)  |
| C(8)  | 27(2) | 23(2) | 29(2) | -8(1)  | 4(1)   | -11(2) |
| C(9)  | 24(2) | 23(2) | 31(2) | -4(1)  | 5(1)   | -10(1) |
| C(10) | 24(2) | 25(2) | 24(2) | -4(1)  | 4(1)   | -9(1)  |
| C(11) | 30(2) | 26(2) | 38(2) | -13(2) | 8(2)   | -16(2) |
| C(12) | 41(2) | 23(2) | 43(2) | -9(2)  | 6(2)   | -16(2) |
| C(13) | 37(2) | 22(2) | 40(2) | -14(2) | 4(2)   | -9(2)  |
| C(14) | 23(2) | 26(2) | 29(2) | -13(1) | 0(1)   | -6(1)  |
| C(15) | 27(2) | 32(2) | 39(2) | -17(2) | 8(2)   | -7(2)  |
| C(16) | 26(2) | 38(2) | 33(2) | -15(2) | 11(2)  | -13(2) |
| C(17) | 21(2) | 26(2) | 21(2) | -7(1)  | -2(1)  | -8(1)  |
| C(18) | 17(2) | 27(2) | 25(2) | -9(1)  | 6(1)   | -11(1) |
| C(19) | 24(2) | 32(2) | 34(2) | -16(2) | 4(1)   | -5(2)  |
| C(20) | 34(2) | 48(2) | 32(2) | -24(2) | 11(2)  | -19(2) |
| C(21) | 42(2) | 44(2) | 25(2) | -3(2)  | -2(2)  | -24(2) |
| C(22) | 68(3) | 27(2) | 48(3) | 2(2)   | -22(2) | -14(2) |
| C(23) | 50(2) | 28(2) | 39(2) | -11(2) | -14(2) | -13(2) |
| C(24) | 21(2) | 21(2) | 27(2) | -8(1)  | 0(1)   | -6(1)  |
| C(25) | 26(2) | 27(2) | 32(2) | -12(2) | 5(1)   | -9(2)  |
| C(26) | 30(2) | 37(2) | 30(2) | -14(2) | 7(2)   | -9(2)  |
| C(27) | 31(2) | 33(2) | 45(2) | -25(2) | 1(2)   | -1(2)  |
| C(28) | 32(2) | 26(2) | 44(2) | -11(2) | -3(2)  | -9(2)  |
| C(29) | 27(2) | 22(2) | 31(2) | -8(1)  | 4(1)   | -10(2) |

---

Table 5. Hydrogen coordinates ( $\times 10^4$ ) and isotropic displacement parameters ( $\text{\AA}^2 \times 10^3$ ) for compound **3**.

|        | x     | y     | z     | U(eq) |
|--------|-------|-------|-------|-------|
| H(1A)  | 2011  | -627  | 9434  | 32    |
| H(2A)  | 4046  | -2504 | 10534 | 37    |
| H(3A)  | 7026  | -2989 | 10440 | 36    |
| H(5A)  | 9393  | -1800 | 9267  | 36    |
| H(6A)  | 8680  | 362   | 7932  | 34    |
| H(8A)  | 5672  | 2826  | 7634  | 30    |
| H(8B)  | 3970  | 2494  | 7481  | 30    |
| H(9A)  | 5190  | 3370  | 6106  | 32    |
| H(9B)  | 6815  | 1863  | 6410  | 32    |
| H(10A) | 3390  | 1979  | 6073  | 30    |
| H(10B) | 4679  | 2027  | 5296  | 30    |
| H(11A) | 1736  | -1692 | 7782  | 35    |
| H(12A) | 3465  | -4026 | 7853  | 41    |
| H(13A) | 6143  | -4497 | 7213  | 39    |
| H(15A) | 8235  | -2904 | 6150  | 39    |
| H(16A) | 7637  | -273  | 5609  | 37    |
| H(19A) | 665   | 467   | 5921  | 36    |
| H(20A) | -1070 | 1576  | 4546  | 42    |
| H(21A) | -2749 | 4048  | 4100  | 43    |
| H(22A) | -2669 | 5412  | 5073  | 62    |
| H(23A) | -942  | 4325  | 6438  | 47    |
| H(25A) | -757  | 1854  | 8912  | 33    |
| H(26A) | -2041 | 3657  | 9599  | 39    |
| H(27A) | -1516 | 5830  | 9156  | 44    |
| H(28A) | 268   | 6181  | 7998  | 41    |
| H(29A) | 1528  | 4392  | 7307  | 32    |

**S5 X-ray structure data for compound 4.**

Diagrams showing the structure of compound **4** with labeling schemes:

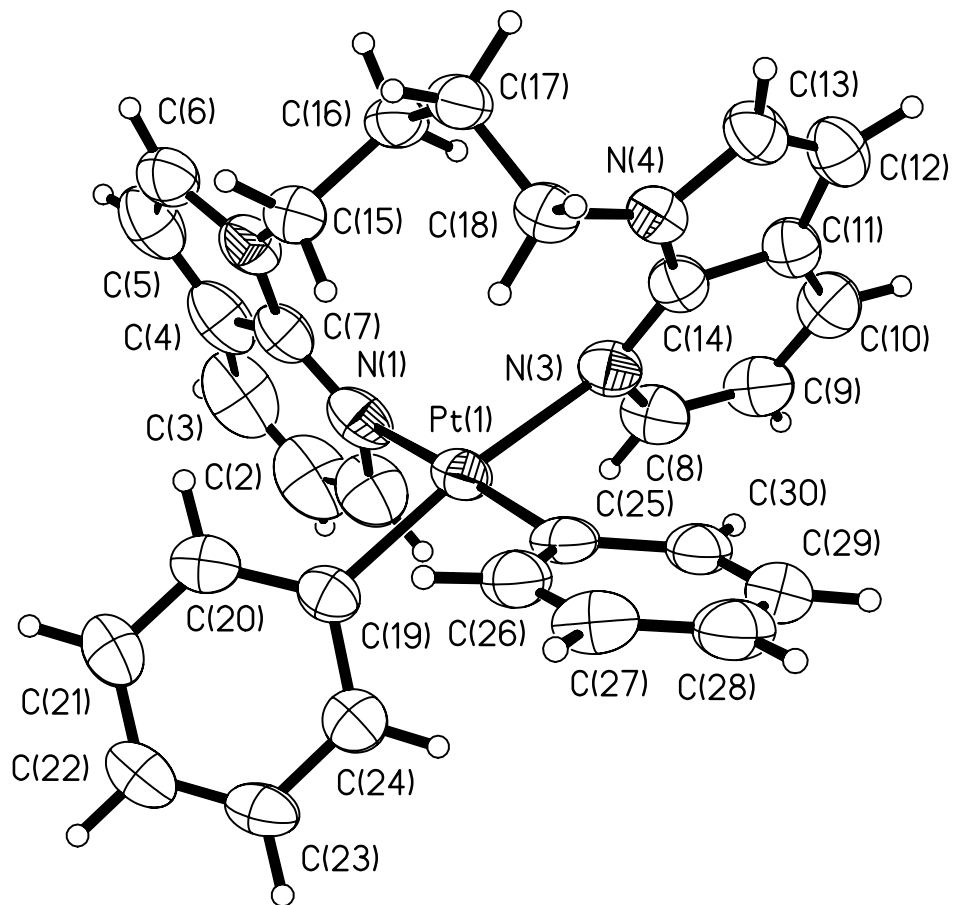

Table 1. Crystal data and structure refinement for compound **4**.

|                                   |                                                   |                  |
|-----------------------------------|---------------------------------------------------|------------------|
| Identification code               | <b>4</b>                                          |                  |
| Empirical formula                 | C <sub>30</sub> H <sub>28</sub> N <sub>4</sub> Pt |                  |
| Formula weight                    | 639.65                                            |                  |
| Temperature                       | 180(2) K                                          |                  |
| Wavelength                        | 0.71073 Å                                         |                  |
| Crystal system                    | Monoclinic                                        |                  |
| Space group                       | P2(1)/n                                           |                  |
| Unit cell dimensions              | a = 13.0677(16) Å                                 | α = 90°.         |
|                                   | b = 10.5124(12) Å                                 | β = 109.140(2)°. |
|                                   | c = 19.077(2) Å                                   | γ = 90°.         |
| Volume                            | 2475.8(5) Å <sup>3</sup>                          |                  |
| Z                                 | 4                                                 |                  |
| Density (calculated)              | 1.716 Mg/m <sup>3</sup>                           |                  |
| Absorption coefficient            | 5.694 mm <sup>-1</sup>                            |                  |
| F(000)                            | 1256                                              |                  |
| Crystal size                      | 0.20 x 0.10 x 0.10 mm <sup>3</sup>                |                  |
| Theta range for data collection   | 2.26 to 27.00°.                                   |                  |
| Index ranges                      | -16 ≤ h ≤ 16, -12 ≤ k ≤ 13, -24 ≤ l ≤ 23          |                  |
| Reflections collected             | 16791                                             |                  |
| Independent reflections           | 5408 [R(int) = 0.0396]                            |                  |
| Completeness to theta = 27.00°    | 99.9 %                                            |                  |
| Absorption correction             | Semi-empirical from equivalents                   |                  |
| Max. and min. transmission        | 0.5998 and 0.3955                                 |                  |
| Refinement method                 | Full-matrix least-squares on F <sup>2</sup>       |                  |
| Data / restraints / parameters    | 5408 / 0 / 316                                    |                  |
| Goodness-of-fit on F <sup>2</sup> | 0.998                                             |                  |
| Final R indices [I > 2σ(I)]       | R1 = 0.0384, wR2 = 0.0835                         |                  |
| R indices (all data)              | R1 = 0.0642, wR2 = 0.0946                         |                  |
| Largest diff. peak and hole       | 2.784 and -1.456 e.Å <sup>-3</sup>                |                  |

Table 2. Atomic coordinates ( $\times 10^4$ ) and equivalent isotropic displacement parameters ( $\text{\AA}^2 \times 10^3$ ) for compound **4**.  $U(\text{eq})$  is defined as one third of the trace of the orthogonalized  $U^{ij}$  tensor.

|       | x        | y       | z       | $U(\text{eq})$ |
|-------|----------|---------|---------|----------------|
| Pt(1) | 52(1)    | 4517(1) | 2319(1) | 42(1)          |
| N(1)  | 1188(4)  | 5553(5) | 3249(3) | 52(1)          |
| N(2)  | 59(5)    | 6479(5) | 3911(3) | 50(1)          |
| N(3)  | 325(4)   | 2796(5) | 2977(3) | 46(1)          |
| N(4)  | -1443(4) | 2211(4) | 3050(3) | 42(1)          |
| C(1)  | 2211(6)  | 5554(7) | 3228(5) | 70(2)          |
| C(2)  | 3045(6)  | 6242(8) | 3724(6) | 86(3)          |
| C(3)  | 2848(7)  | 6973(8) | 4257(5) | 85(3)          |
| C(4)  | 1825(6)  | 7012(7) | 4312(4) | 64(2)          |
| C(5)  | 1310(7)  | 7644(7) | 4755(4) | 68(2)          |
| C(6)  | 255(6)   | 7308(6) | 4509(4) | 57(2)          |
| C(7)  | 1021(5)  | 6279(5) | 3780(3) | 45(2)          |
| C(8)  | 1333(5)  | 2316(6) | 3105(4) | 54(2)          |
| C(9)  | 1650(6)  | 1099(6) | 3343(4) | 56(2)          |
| C(10) | 923(6)   | 278(6)  | 3481(4) | 55(2)          |
| C(11) | -121(5)  | 728(5)  | 3383(3) | 44(1)          |
| C(12) | -1061(6) | 219(6)  | 3485(4) | 53(2)          |
| C(13) | -1834(5) | 1132(5) | 3274(3) | 49(2)          |
| C(14) | -377(5)  | 1999(5) | 3124(3) | 42(1)          |
| C(15) | -994(5)  | 5909(5) | 3543(3) | 45(1)          |
| C(16) | -1188(5) | 4737(5) | 3942(3) | 45(1)          |
| C(17) | -2231(5) | 4077(6) | 3477(3) | 47(2)          |
| C(18) | -2103(5) | 3350(5) | 2821(3) | 44(1)          |
| C(19) | 35(5)    | 6042(5) | 1693(3) | 43(1)          |
| C(20) | -55(5)   | 7280(6) | 1925(4) | 52(2)          |
| C(21) | 74(6)    | 8339(6) | 1534(4) | 58(2)          |
| C(22) | 309(5)   | 8187(6) | 881(4)  | 57(2)          |
| C(23) | 405(5)   | 6987(6) | 627(3)  | 51(2)          |
| C(24) | 262(5)   | 5928(6) | 1021(4) | 48(2)          |
| C(25) | -922(5)  | 3563(6) | 1440(3) | 43(1)          |
| C(26) | -1802(5) | 4116(6) | 890(3)  | 50(2)          |



|       |          |         |         |       |
|-------|----------|---------|---------|-------|
| C(27) | -2503(6) | 3435(7) | 316(4)  | 57(2) |
| C(28) | -2361(6) | 2142(7) | 242(4)  | 59(2) |
| C(29) | -1492(6) | 1570(6) | 758(4)  | 57(2) |
| C(30) | -810(5)  | 2231(5) | 1339(3) | 46(2) |

Table 3. Bond lengths [ $\text{\AA}$ ] and angles [ $^\circ$ ] for compound **4**.

|             |           |                   |           |
|-------------|-----------|-------------------|-----------|
| Pt(1)-C(19) | 1.995(6)  | C(17)-C(18)       | 1.522(8)  |
| Pt(1)-C(25) | 2.010(6)  | C(19)-C(20)       | 1.392(8)  |
| Pt(1)-N(3)  | 2.163(5)  | C(19)-C(24)       | 1.414(8)  |
| Pt(1)-N(1)  | 2.193(5)  | C(20)-C(21)       | 1.381(8)  |
| N(1)-C(7)   | 1.341(8)  | C(21)-C(22)       | 1.388(9)  |
| N(1)-C(1)   | 1.350(9)  | C(22)-C(23)       | 1.371(9)  |
| N(2)-C(7)   | 1.377(8)  | C(23)-C(24)       | 1.390(8)  |
| N(2)-C(6)   | 1.393(8)  | C(25)-C(26)       | 1.403(8)  |
| N(2)-C(15)  | 1.452(8)  | C(25)-C(30)       | 1.428(8)  |
| N(3)-C(14)  | 1.338(7)  | C(26)-C(27)       | 1.375(9)  |
| N(3)-C(8)   | 1.356(8)  | C(27)-C(28)       | 1.386(10) |
| N(4)-C(13)  | 1.370(7)  | C(28)-C(29)       | 1.374(9)  |
| N(4)-C(14)  | 1.371(7)  | C(29)-C(30)       | 1.363(9)  |
| N(4)-C(18)  | 1.457(7)  |                   |           |
| C(1)-C(2)   | 1.389(11) | C(19)-Pt(1)-C(25) | 91.3(2)   |
| C(2)-C(3)   | 1.366(12) | C(19)-Pt(1)-N(3)  | 170.6(2)  |
| C(3)-C(4)   | 1.375(11) | C(25)-Pt(1)-N(3)  | 90.3(2)   |
| C(4)-C(5)   | 1.408(11) | C(19)-Pt(1)-N(1)  | 87.5(2)   |
| C(4)-C(7)   | 1.424(9)  | C(25)-Pt(1)-N(1)  | 176.7(2)  |
| C(5)-C(6)   | 1.349(10) | N(3)-Pt(1)-N(1)   | 90.40(18) |
| C(8)-C(9)   | 1.375(8)  | C(7)-N(1)-C(1)    | 115.4(6)  |
| C(9)-C(10)  | 1.371(9)  | C(7)-N(1)-Pt(1)   | 131.2(4)  |
| C(10)-C(11) | 1.398(9)  | C(1)-N(1)-Pt(1)   | 113.0(5)  |
| C(11)-C(12) | 1.410(9)  | C(7)-N(2)-C(6)    | 108.1(5)  |
| C(11)-C(14) | 1.426(7)  | C(7)-N(2)-C(15)   | 128.8(5)  |
| C(12)-C(13) | 1.356(9)  | C(6)-N(2)-C(15)   | 123.0(6)  |
| C(15)-C(16) | 1.513(8)  | C(14)-N(3)-C(8)   | 114.9(5)  |
| C(16)-C(17) | 1.528(8)  | C(14)-N(3)-Pt(1)  | 130.7(4)  |

|                   |          |                   |          |
|-------------------|----------|-------------------|----------|
| C(8)-N(3)-Pt(1)   | 112.4(4) | N(3)-C(14)-N(4)   | 128.3(5) |
| C(13)-N(4)-C(14)  | 107.7(5) | N(3)-C(14)-C(11)  | 124.1(6) |
| C(13)-N(4)-C(18)  | 122.0(5) | N(4)-C(14)-C(11)  | 107.6(5) |
| C(14)-N(4)-C(18)  | 130.2(5) | N(2)-C(15)-C(16)  | 112.4(5) |
| N(1)-C(1)-C(2)    | 122.9(8) | C(15)-C(16)-C(17) | 110.0(5) |
| C(3)-C(2)-C(1)    | 120.2(8) | C(18)-C(17)-C(16) | 112.8(5) |
| C(2)-C(3)-C(4)    | 119.9(8) | N(4)-C(18)-C(17)  | 112.3(5) |
| C(3)-C(4)-C(5)    | 136.6(8) | C(20)-C(19)-C(24) | 115.6(5) |
| C(3)-C(4)-C(7)    | 116.0(8) | C(20)-C(19)-Pt(1) | 123.2(5) |
| C(5)-C(4)-C(7)    | 107.4(7) | C(24)-C(19)-Pt(1) | 120.7(4) |
| C(6)-C(5)-C(4)    | 107.6(7) | C(21)-C(20)-C(19) | 123.0(6) |
| C(5)-C(6)-N(2)    | 110.0(7) | C(20)-C(21)-C(22) | 119.6(6) |
| N(1)-C(7)-N(2)    | 127.5(5) | C(23)-C(22)-C(21) | 119.7(6) |
| N(1)-C(7)-C(4)    | 125.6(7) | C(22)-C(23)-C(24) | 120.2(6) |
| N(2)-C(7)-C(4)    | 107.0(6) | C(23)-C(24)-C(19) | 121.8(6) |
| N(3)-C(8)-C(9)    | 125.1(7) | C(26)-C(25)-C(30) | 113.6(6) |
| C(10)-C(9)-C(8)   | 119.8(6) | C(26)-C(25)-Pt(1) | 123.9(5) |
| C(9)-C(10)-C(11)  | 117.9(6) | C(30)-C(25)-Pt(1) | 122.4(5) |
| C(10)-C(11)-C(12) | 135.2(6) | C(27)-C(26)-C(25) | 123.2(6) |
| C(10)-C(11)-C(14) | 118.1(6) | C(26)-C(27)-C(28) | 121.0(7) |
| C(12)-C(11)-C(14) | 106.7(6) | C(29)-C(28)-C(27) | 117.6(7) |
| C(13)-C(12)-C(11) | 106.8(5) | C(30)-C(29)-C(28) | 121.7(6) |
| C(12)-C(13)-N(4)  | 111.1(6) | C(29)-C(30)-C(25) | 122.7(6) |

Table 4. Anisotropic displacement parameters ( $\text{\AA}^2 \times 10^3$ ) for compound **4**. The anisotropic displacement factor exponent takes the form:  $-2\pi^2 [ h^2 a^{*2} U^{11} + \dots + 2 h k a^* b^* U^{12} ]$

|       | $U^{11}$ | $U^{22}$ | $U^{33}$ | $U^{23}$ | $U^{13}$ | $U^{12}$ |
|-------|----------|----------|----------|----------|----------|----------|
| Pt(1) | 41(1)    | 46(1)    | 43(1)    | 9(1)     | 19(1)    | 2(1)     |
| N(1)  | 39(3)    | 56(3)    | 59(3)    | 18(3)    | 12(3)    | -5(3)    |
| N(2)  | 58(4)    | 48(3)    | 40(3)    | 6(2)     | 12(3)    | -8(3)    |
| N(3)  | 43(3)    | 53(3)    | 41(3)    | 5(2)     | 13(2)    | 1(2)     |
| N(4)  | 41(3)    | 44(2)    | 40(3)    | 4(2)     | 12(2)    | -4(2)    |
| C(1)  | 43(4)    | 76(5)    | 93(6)    | 10(4)    | 23(4)    | -1(4)    |

|       |       |       |        |       |        |        |
|-------|-------|-------|--------|-------|--------|--------|
| C(2)  | 37(4) | 92(6) | 121(8) | 20(6) | 14(5)  | -9(4)  |
| C(3)  | 63(6) | 84(5) | 81(6)  | 13(5) | -14(5) | -23(5) |
| C(4)  | 56(5) | 62(4) | 59(5)  | 25(4) | -4(4)  | -6(4)  |
| C(5)  | 82(6) | 59(4) | 47(4)  | 12(3) | 0(4)   | -16(4) |
| C(6)  | 77(5) | 53(4) | 43(4)  | 3(3)  | 21(4)  | -6(4)  |
| C(7)  | 40(4) | 47(3) | 41(3)  | 10(3) | 4(3)   | -6(3)  |
| C(8)  | 45(4) | 65(4) | 52(4)  | 12(3) | 15(3)  | 7(3)   |
| C(9)  | 48(4) | 69(4) | 50(4)  | 12(3) | 14(3)  | 18(3)  |
| C(10) | 59(4) | 54(4) | 46(4)  | 11(3) | 8(3)   | 16(3)  |
| C(11) | 47(4) | 44(3) | 37(3)  | 4(2)  | 8(3)   | 0(3)   |
| C(12) | 56(4) | 48(3) | 48(4)  | 7(3)  | 8(3)   | -5(3)  |
| C(13) | 49(4) | 50(3) | 47(4)  | -1(3) | 14(3)  | -15(3) |
| C(14) | 47(4) | 45(3) | 30(3)  | 2(2)  | 7(3)   | -2(3)  |
| C(15) | 42(4) | 49(3) | 43(3)  | 4(3)  | 14(3)  | 1(3)   |
| C(16) | 50(4) | 52(3) | 37(3)  | 4(3)  | 19(3)  | 2(3)   |
| C(17) | 48(4) | 50(3) | 47(4)  | 7(3)  | 24(3)  | 0(3)   |
| C(18) | 40(3) | 49(3) | 43(3)  | 6(3)  | 13(3)  | 1(3)   |
| C(19) | 37(3) | 48(3) | 43(4)  | 7(3)  | 13(3)  | 0(3)   |
| C(20) | 51(4) | 61(4) | 45(4)  | 5(3)  | 18(3)  | 0(3)   |
| C(21) | 59(4) | 47(3) | 66(5)  | 13(3) | 18(4)  | 3(3)   |
| C(22) | 52(4) | 58(4) | 59(4)  | 20(3) | 17(3)  | -4(3)  |
| C(23) | 44(4) | 68(4) | 48(4)  | 15(3) | 23(3)  | 3(3)   |
| C(24) | 36(3) | 53(3) | 55(4)  | 4(3)  | 16(3)  | 3(3)   |
| C(25) | 44(4) | 56(3) | 38(3)  | 8(3)  | 23(3)  | 7(3)   |
| C(26) | 53(4) | 56(3) | 45(4)  | 7(3)  | 25(3)  | 9(3)   |
| C(27) | 50(4) | 79(4) | 44(4)  | 5(3)  | 19(3)  | 6(4)   |
| C(28) | 62(5) | 74(4) | 49(4)  | -5(4) | 27(4)  | -18(4) |
| C(29) | 75(5) | 50(3) | 53(4)  | 3(3)  | 33(4)  | -2(3)  |
| C(30) | 49(4) | 51(3) | 46(4)  | 6(3)  | 28(3)  | 3(3)   |

Table 5. Hydrogen coordinates ( $\times 10^4$ ) and isotropic displacement parameters ( $\text{\AA}^2 \times 10^3$ ) for compound 4.

|  | x | y | z | U(eq) |
|--|---|---|---|-------|
|--|---|---|---|-------|

|        |       |      |      |     |
|--------|-------|------|------|-----|
| H(1A)  | 2367  | 5062 | 2857 | 84  |
| H(2A)  | 3754  | 6203 | 3692 | 104 |
| H(3A)  | 3417  | 7454 | 4591 | 102 |
| H(5A)  | 1645  | 8206 | 5154 | 81  |
| H(6A)  | -275  | 7595 | 4715 | 68  |
| H(8A)  | 1862  | 2863 | 3024 | 65  |
| H(9A)  | 2370  | 828  | 3412 | 67  |
| H(10A) | 1123  | -571 | 3638 | 66  |
| H(12A) | -1137 | -605 | 3667 | 64  |
| H(13A) | -2554 | 1036 | 3282 | 59  |
| H(15A) | -1047 | 5676 | 3030 | 54  |
| H(15B) | -1566 | 6543 | 3515 | 54  |
| H(16A) | -1245 | 4983 | 4429 | 54  |
| H(16B) | -570  | 4145 | 4031 | 54  |
| H(17A) | -2463 | 3478 | 3797 | 56  |
| H(17B) | -2808 | 4723 | 3291 | 56  |
| H(18A) | -2828 | 3106 | 2482 | 53  |
| H(18B) | -1764 | 3914 | 2544 | 53  |
| H(20A) | -213  | 7402 | 2372 | 62  |
| H(21A) | 2     | 9168 | 1712 | 70  |
| H(22A) | 404   | 8911 | 610  | 68  |
| H(23A) | 571   | 6880 | 182  | 61  |
| H(24A) | 317   | 5104 | 832  | 57  |
| H(26A) | -1919 | 5004 | 914  | 59  |
| H(27A) | -3094 | 3857 | -34  | 68  |
| H(28A) | -2847 | 1667 | -151 | 71  |
| H(29A) | -1362 | 690  | 709  | 68  |
| H(30A) | -237  | 1786 | 1692 | 55  |

---

## S6 X-ray structure data for compound 5.

Diagrams showing the structure of compound 5 with labeling schemes:

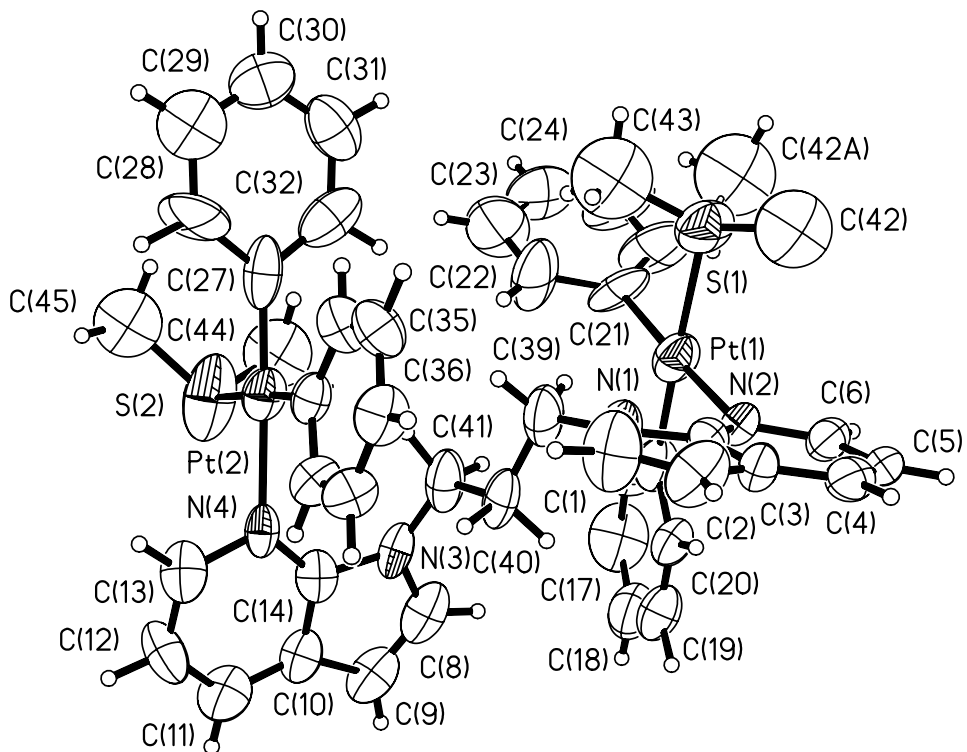

Table 1. Crystal data and structure refinement for compound **5**.

|                                   |                                                                               |                 |
|-----------------------------------|-------------------------------------------------------------------------------|-----------------|
| Identification code               | 5                                                                             |                 |
| Empirical formula                 | C <sub>45</sub> H <sub>48</sub> N <sub>4</sub> Pt <sub>2</sub> S <sub>2</sub> |                 |
| Formula weight                    | 1099.17                                                                       |                 |
| Temperature                       | 180(2) K                                                                      |                 |
| Wavelength                        | 0.71073 Å                                                                     |                 |
| Crystal system                    | Triclinic                                                                     |                 |
| Space group                       | P-1                                                                           |                 |
| Unit cell dimensions              | a = 11.7088(15) Å                                                             | α = 80.192(2)°. |
|                                   | b = 12.9165(17) Å                                                             | β = 83.251(3)°. |
|                                   | c = 14.9862(19) Å                                                             | γ = 63.096(2)°. |
| Volume                            | 1989.5(4) Å <sup>3</sup>                                                      |                 |
| Z                                 | 2                                                                             |                 |
| Density (calculated)              | 1.835 Mg/m <sup>3</sup>                                                       |                 |
| Absorption coefficient            | 7.167 mm <sup>-1</sup>                                                        |                 |
| F(000)                            | 1068                                                                          |                 |
| Crystal size                      | 0.20 x 0.20 x 0.10 mm <sup>3</sup>                                            |                 |
| Theta range for data collection   | 1.95 to 28.00°.                                                               |                 |
| Index ranges                      | -15 ≤ h ≤ 15, -14 ≤ k ≤ 16, -19 ≤ l ≤ 18                                      |                 |
| Reflections collected             | 14309                                                                         |                 |
| Independent reflections           | 9042 [R(int) = 0.0444]                                                        |                 |
| Completeness to theta = 28.00°    | 94.0 %                                                                        |                 |
| Absorption correction             | Semi-empirical from equivalents                                               |                 |
| Max. and min. transmission        | 0.5343 and 0.3282                                                             |                 |
| Refinement method                 | Full-matrix least-squares on F <sup>2</sup>                                   |                 |
| Data / restraints / parameters    | 9042 / 7 / 470                                                                |                 |
| Goodness-of-fit on F <sup>2</sup> | 0.804                                                                         |                 |
| Final R indices [I > 2σ(I)]       | R <sub>1</sub> = 0.0502, wR <sub>2</sub> = 0.0639                             |                 |
| R indices (all data)              | R <sub>1</sub> = 0.1638, wR <sub>2</sub> = 0.0758                             |                 |
| Largest diff. peak and hole       | 1.188 and -1.375 e.Å <sup>-3</sup>                                            |                 |

Table 2. Atomic coordinates ( $\times 10^4$ ) and equivalent isotropic displacement parameters ( $\text{\AA}^2 \times 10^3$ ) for 5.  $U(\text{eq})$  is defined as one third of the trace of the orthogonalized  $U^{ij}$  tensor.

|       | x         | y        | z        | $U(\text{eq})$ |
|-------|-----------|----------|----------|----------------|
| Pt(1) | -51(1)    | 2221(1)  | 7608(1)  | 62(1)          |
| Pt(2) | 5064(1)   | 3186(1)  | 7584(1)  | 55(1)          |
| S(1)  | 882(3)    | 300(3)   | 8374(2)  | 84(1)          |
| S(2)  | 5492(4)   | 3591(4)  | 6021(2)  | 114(2)         |
| N(1)  | 792(8)    | 2903(7)  | 9473(5)  | 62(3)          |
| N(2)  | -963(7)   | 2810(7)  | 8859(5)  | 41(2)          |
| N(3)  | 1976(9)   | 5312(9)  | 7004(5)  | 52(3)          |
| N(4)  | 3992(8)   | 5036(7)  | 7463(5)  | 42(2)          |
| C(1)  | 1040(12)  | 2964(11) | 10345(7) | 89(4)          |
| C(2)  | 17(11)    | 3075(10) | 10901(7) | 76(4)          |
| C(3)  | -887(10)  | 3021(9)  | 10417(7) | 46(3)          |
| C(4)  | -2054(10) | 3044(8)  | 10630(7) | 54(3)          |
| C(5)  | -2706(9)  | 2989(8)  | 9948(7)  | 47(3)          |
| C(6)  | -2150(9)  | 2864(8)  | 9101(6)  | 47(3)          |
| C(7)  | -410(10)  | 2907(9)  | 9505(7)  | 43(3)          |
| C(8)  | 990(12)   | 6245(14) | 6638(7)  | 67(4)          |
| C(9)  | 1150(11)  | 7201(11) | 6489(6)  | 65(4)          |
| C(10) | 2337(11)  | 6880(12) | 6796(7)  | 52(3)          |
| C(11) | 3056(12)  | 7451(10) | 6822(7)  | 72(4)          |
| C(12) | 4230(12)  | 6830(11) | 7176(7)  | 69(4)          |
| C(13) | 4673(10)  | 5652(11) | 7500(6)  | 61(3)          |
| C(14) | 2854(12)  | 5689(12) | 7123(6)  | 47(3)          |
| C(15) | -895(9)   | 3866(10) | 6940(7)  | 52(3)          |
| C(16) | -873(13)  | 4153(13) | 6007(9)  | 103(5)         |
| C(17) | -1505(13) | 5309(15) | 5603(8)  | 93(5)          |
| C(18) | -2124(11) | 6229(12) | 6052(9)  | 83(4)          |
| C(19) | -2183(10) | 5970(12) | 6927(8)  | 65(4)          |
| C(20) | -1611(10) | 4848(11) | 7342(7)  | 59(3)          |
| C(21) | 929(10)   | 1509(10) | 6480(6)  | 78(4)          |
| C(22) | 2159(12)  | 1448(12) | 6303(8)  | 109(5)         |
| C(23) | 2945(15)  | 885(13)  | 5639(10) | 134(7)         |

|        |          |          |          |         |
|--------|----------|----------|----------|---------|
| C(24)  | 2487(16) | 411(13)  | 5120(9)  | 107(5)  |
| C(25)  | 1327(14) | 384(12)  | 5296(10) | 110(5)  |
| C(26)  | 632(13)  | 913(12)  | 5997(9)  | 121(6)  |
| C(27)  | 6106(11) | 1495(7)  | 7581(7)  | 71(5)   |
| C(28)  | 7340(15) | 920(12)  | 7698(9)  | 108(5)  |
| C(29)  | 8046(15) | -298(15) | 7643(9)  | 122(5)  |
| C(30)  | 7503(15) | -955(12) | 7450(9)  | 101(5)  |
| C(31)  | 6264(16) | -444(14) | 7285(8)  | 82(4)   |
| C(32)  | 5585(11) | 791(16)  | 7371(7)  | 101(6)  |
| C(33)  | 4703(9)  | 2910(10) | 8927(6)  | 43(3)   |
| C(34)  | 4949(10) | 1870(10) | 9444(7)  | 58(3)   |
| C(35)  | 4687(10) | 1728(10) | 10359(7) | 59(3)   |
| C(36)  | 4154(9)  | 2667(11) | 10805(7) | 56(3)   |
| C(37)  | 3862(9)  | 3737(10) | 10375(7) | 53(3)   |
| C(38)  | 4135(8)  | 3854(9)  | 9410(6)  | 47(3)   |
| C(39)  | 1627(9)  | 2921(9)  | 8683(6)  | 68(3)   |
| C(40)  | 1394(8)  | 4178(10) | 8288(6)  | 60(3)   |
| C(41)  | 1983(9)  | 4196(10) | 7343(6)  | 68(4)   |
| C(42A) | 690(30)  | -510(30) | 7634(18) | 166(15) |
| C(42)  | 120(30)  | 100(30)  | 9469(13) | 163(12) |
| C(43)  | 2506(11) | -263(11) | 8392(9)  | 158(6)  |
| C(44)  | 4811(13) | 3016(14) | 5431(7)  | 163(8)  |
| C(45)  | 7130(10) | 2727(12) | 5760(7)  | 144(7)  |

---



Table 3. Bond lengths [Å] and angles [°] for 5.

|             |           |                   |           |
|-------------|-----------|-------------------|-----------|
| Pt(1)-C(15) | 2.026(11) | C(12)-C(13)       | 1.383(13) |
| Pt(1)-C(21) | 2.035(7)  | C(15)-C(20)       | 1.362(12) |
| Pt(1)-N(2)  | 2.125(7)  | C(15)-C(16)       | 1.385(14) |
| Pt(1)-S(1)  | 2.353(3)  | C(16)-C(17)       | 1.394(15) |
| Pt(2)-C(27) | 1.962(8)  | C(17)-C(18)       | 1.329(15) |
| Pt(2)-C(33) | 2.013(9)  | C(18)-C(19)       | 1.299(13) |
| Pt(2)-N(4)  | 2.124(8)  | C(19)-C(20)       | 1.358(13) |
| Pt(2)-S(2)  | 2.357(3)  | C(21)-C(26)       | 1.314(13) |
| S(1)-C(43)  | 1.702(11) | C(21)-C(22)       | 1.402(13) |
| S(1)-C(42A) | 1.746(17) | C(22)-C(23)       | 1.338(13) |
| S(1)-C(42)  | 1.809(15) | C(23)-C(24)       | 1.351(17) |
| S(2)-C(44)  | 1.700(9)  | C(24)-C(25)       | 1.368(16) |
| S(2)-C(45)  | 1.765(10) | C(25)-C(26)       | 1.331(14) |
| N(1)-C(1)   | 1.394(11) | C(27)-C(28)       | 1.309(14) |
| N(1)-C(7)   | 1.400(11) | C(27)-C(32)       | 1.393(16) |
| N(1)-C(39)  | 1.449(10) | C(28)-C(29)       | 1.420(16) |
| N(2)-C(7)   | 1.278(10) | C(29)-C(30)       | 1.350(15) |
| N(2)-C(6)   | 1.369(9)  | C(30)-C(31)       | 1.328(15) |
| N(3)-C(8)   | 1.323(12) | C(31)-C(32)       | 1.447(16) |
| N(3)-C(14)  | 1.361(11) | C(33)-C(34)       | 1.355(12) |
| N(3)-C(41)  | 1.441(12) | C(33)-C(38)       | 1.380(11) |
| N(4)-C(14)  | 1.320(12) | C(34)-C(35)       | 1.369(11) |
| N(4)-C(13)  | 1.368(11) | C(35)-C(36)       | 1.341(11) |
| C(1)-C(2)   | 1.343(12) | C(36)-C(37)       | 1.327(12) |
| C(2)-C(3)   | 1.384(12) | C(37)-C(38)       | 1.441(11) |
| C(3)-C(4)   | 1.354(11) | C(39)-C(40)       | 1.539(12) |
| C(3)-C(7)   | 1.420(11) | C(40)-C(41)       | 1.502(11) |
| C(4)-C(5)   | 1.375(11) |                   |           |
| C(5)-C(6)   | 1.357(10) | C(15)-Pt(1)-C(21) | 93.8(4)   |
| C(8)-C(9)   | 1.310(13) | C(15)-Pt(1)-N(2)  | 91.5(4)   |
| C(9)-C(10)  | 1.371(13) | C(21)-Pt(1)-N(2)  | 174.5(4)  |
| C(10)-C(11) | 1.354(13) | C(15)-Pt(1)-S(1)  | 178.4(3)  |
| C(10)-C(14) | 1.394(13) | C(21)-Pt(1)-S(1)  | 86.1(3)   |
| C(11)-C(12) | 1.358(13) | N(2)-Pt(1)-S(1)   | 88.5(2)   |

|                   |           |                   |           |
|-------------------|-----------|-------------------|-----------|
| C(27)-Pt(2)-C(33) | 89.8(4)   | N(2)-C(7)-C(3)    | 126.8(10) |
| C(27)-Pt(2)-N(4)  | 174.8(3)  | N(1)-C(7)-C(3)    | 105.5(9)  |
| C(33)-Pt(2)-N(4)  | 95.3(4)   | C(9)-C(8)-N(3)    | 114.1(12) |
| C(27)-Pt(2)-S(2)  | 92.4(3)   | C(8)-C(9)-C(10)   | 105.2(12) |
| C(33)-Pt(2)-S(2)  | 177.3(3)  | C(11)-C(10)-C(9)  | 134.2(15) |
| N(4)-Pt(2)-S(2)   | 82.5(2)   | C(11)-C(10)-C(14) | 118.1(12) |
| C(43)-S(1)-C(42A) | 102.4(11) | C(9)-C(10)-C(14)  | 107.7(11) |
| C(43)-S(1)-C(42)  | 113.6(11) | C(10)-C(11)-C(12) | 117.9(12) |
| C(42A)-S(1)-C(42) | 109.7(13) | C(11)-C(12)-C(13) | 120.8(11) |
| C(43)-S(1)-Pt(1)  | 112.4(5)  | N(4)-C(13)-C(12)  | 123.1(10) |
| C(42A)-S(1)-Pt(1) | 102.7(11) | N(4)-C(14)-N(3)   | 126.1(12) |
| C(42)-S(1)-Pt(1)  | 114.7(10) | N(4)-C(14)-C(10)  | 126.9(11) |
| C(44)-S(2)-C(45)  | 100.4(6)  | N(3)-C(14)-C(10)  | 107.0(11) |
| C(44)-S(2)-Pt(2)  | 109.1(4)  | C(20)-C(15)-C(16) | 110.0(11) |
| C(45)-S(2)-Pt(2)  | 109.0(4)  | C(20)-C(15)-Pt(1) | 124.9(9)  |
| C(1)-N(1)-C(7)    | 108.2(8)  | C(16)-C(15)-Pt(1) | 125.0(10) |
| C(1)-N(1)-C(39)   | 123.8(9)  | C(15)-C(16)-C(17) | 121.2(12) |
| C(7)-N(1)-C(39)   | 127.9(9)  | C(18)-C(17)-C(16) | 124.8(12) |
| C(7)-N(2)-C(6)    | 113.9(8)  | C(19)-C(18)-C(17) | 114.6(13) |
| C(7)-N(2)-Pt(1)   | 125.3(7)  | C(18)-C(19)-C(20) | 122.1(12) |
| C(6)-N(2)-Pt(1)   | 119.3(6)  | C(19)-C(20)-C(15) | 127.2(11) |
| C(8)-N(3)-C(14)   | 105.9(11) | C(26)-C(21)-C(22) | 115.9(10) |
| C(8)-N(3)-C(41)   | 125.2(11) | C(26)-C(21)-Pt(1) | 126.3(10) |
| C(14)-N(3)-C(41)  | 128.1(11) | C(22)-C(21)-Pt(1) | 116.5(9)  |
| C(14)-N(4)-C(13)  | 113.2(10) | C(23)-C(22)-C(21) | 121.8(12) |
| C(14)-N(4)-Pt(2)  | 128.1(8)  | C(22)-C(23)-C(24) | 117.2(15) |
| C(13)-N(4)-Pt(2)  | 116.0(8)  | C(23)-C(24)-C(25) | 123.3(13) |
| C(2)-C(1)-N(1)    | 109.2(10) | C(26)-C(25)-C(24) | 115.5(14) |
| C(1)-C(2)-C(3)    | 108.6(10) | C(21)-C(26)-C(25) | 125.7(15) |
| C(4)-C(3)-C(2)    | 134.3(10) | C(28)-C(27)-C(32) | 112.7(10) |
| C(4)-C(3)-C(7)    | 117.2(10) | C(28)-C(27)-Pt(2) | 125.9(9)  |
| C(2)-C(3)-C(7)    | 108.4(9)  | C(32)-C(27)-Pt(2) | 121.2(10) |
| C(3)-C(4)-C(5)    | 118.0(9)  | C(27)-C(28)-C(29) | 122.9(12) |
| C(6)-C(5)-C(4)    | 119.8(9)  | C(30)-C(29)-C(28) | 122.7(15) |
| C(5)-C(6)-N(2)    | 124.2(9)  | C(31)-C(30)-C(29) | 119.1(15) |
| N(2)-C(7)-N(1)    | 127.7(9)  | C(30)-C(31)-C(32) | 115.9(13) |

|                   |           |                   |           |
|-------------------|-----------|-------------------|-----------|
| C(27)-C(32)-C(31) | 126.7(12) | C(37)-C(36)-C(35) | 121.4(10) |
| C(34)-C(33)-C(38) | 113.5(8)  | C(36)-C(37)-C(38) | 117.5(10) |
| C(34)-C(33)-Pt(2) | 127.2(8)  | C(33)-C(38)-C(37) | 123.1(9)  |
| C(38)-C(33)-Pt(2) | 119.3(8)  | N(1)-C(39)-C(40)  | 111.8(8)  |
| C(33)-C(34)-C(35) | 125.0(10) | C(41)-C(40)-C(39) | 110.1(9)  |
| C(36)-C(35)-C(34) | 119.5(10) | N(3)-C(41)-C(40)  | 111.9(8)  |

Symmetry transformations used to generate equivalent atoms:

#1 -x,-y,-z+2

Table 4. Anisotropic displacement parameters ( $\text{\AA}^2 \times 10^3$ ) for 5. The anisotropic displacement factor exponent takes the form:  $-2\pi^2 [h^2 a^{*2} U^{11} + \dots + 2 h k a^* b^* U^{12}]$

|       | $U^{11}$ | $U^{22}$ | $U^{33}$ | $U^{23}$ | $U^{13}$ | $U^{12}$ |
|-------|----------|----------|----------|----------|----------|----------|
| Pt(1) | 54(1)    | 72(1)    | 59(1)    | -25(1)   | 8(1)     | -24(1)   |
| Pt(2) | 51(1)    | 75(1)    | 42(1)    | -18(1)   | 8(1)     | -30(1)   |
| S(1)  | 85(3)    | 72(2)    | 72(2)    | -13(2)   | 24(2)    | -21(2)   |
| S(2)  | 98(3)    | 217(5)   | 46(2)    | -36(3)   | 19(2)    | -87(3)   |
| N(1)  | 54(7)    | 81(7)    | 48(6)    | -11(6)   | 7(5)     | -29(6)   |
| N(2)  | 31(5)    | 46(6)    | 36(5)    | -3(5)    | -2(4)    | -10(5)   |
| N(3)  | 32(6)    | 79(8)    | 37(5)    | -4(6)    | 5(4)     | -21(6)   |
| N(4)  | 38(6)    | 70(7)    | 27(5)    | -8(5)    | 4(4)     | -34(6)   |
| C(1)  | 93(11)   | 147(13)  | 58(8)    | -27(9)   | -16(8)   | -73(10)  |
| C(2)  | 68(10)   | 106(11)  | 43(7)    | -10(8)   | 0(7)     | -29(9)   |
| C(3)  | 38(7)    | 51(8)    | 47(7)    | -8(6)    | 1(6)     | -18(6)   |
| C(4)  | 56(8)    | 43(8)    | 48(7)    | 6(6)     | 14(6)    | -18(7)   |
| C(5)  | 37(7)    | 39(7)    | 65(7)    | -20(6)   | 16(6)    | -16(6)   |
| C(6)  | 44(7)    | 45(7)    | 51(7)    | -14(6)   | 1(5)     | -17(6)   |
| C(7)  | 45(8)    | 39(7)    | 40(7)    | 6(6)     | 0(6)     | -17(6)   |
| C(8)  | 47(9)    | 119(13)  | 31(7)    | -27(8)   | 1(6)     | -28(10)  |
| C(9)  | 52(9)    | 85(11)   | 36(7)    | 15(7)    | -10(6)   | -17(8)   |
| C(10) | 41(8)    | 74(11)   | 39(7)    | 3(7)     | -12(6)   | -27(8)   |
| C(11) | 63(10)   | 68(10)   | 53(8)    | 27(7)    | -17(7)   | -11(8)   |
| C(12) | 90(11)   | 68(10)   | 69(8)    | 21(8)    | -22(7)   | -58(9)   |
| C(13) | 59(8)    | 83(10)   | 39(6)    | 12(7)    | -19(6)   | -32(8)   |

|       |         |         |         |          |         |          |
|-------|---------|---------|---------|----------|---------|----------|
| C(14) | 49(9)   | 66(10)  | 32(6)   | -4(7)    | -2(6)   | -32(8)   |
| C(15) | 50(7)   | 68(9)   | 37(6)   | -13(7)   | 10(6)   | -27(7)   |
| C(16) | 138(14) | 105(13) | 76(11)  | -36(10)  | -9(10)  | -55(12)  |
| C(17) | 104(13) | 133(15) | 30(7)   | 29(10)   | -21(7)  | -52(12)  |
| C(18) | 67(10)  | 94(12)  | 78(11)  | -17(10)  | 16(8)   | -29(9)   |
| C(19) | 53(9)   | 77(11)  | 54(8)   | -16(8)   | 14(7)   | -21(8)   |
| C(20) | 45(8)   | 67(9)   | 60(8)   | -15(8)   | 10(7)   | -22(8)   |
| C(21) | 46(8)   | 81(10)  | 75(9)   | -48(8)   | 5(7)    | 10(7)    |
| C(22) | 89(11)  | 174(15) | 89(10)  | -71(10)  | 54(9)   | -76(11)  |
| C(23) | 177(17) | 140(15) | 121(13) | -91(12)  | 85(12)  | -97(13)  |
| C(24) | 126(14) | 94(12)  | 57(9)   | -24(8)   | 40(9)   | -15(11)  |
| C(25) | 88(12)  | 114(13) | 93(11)  | -62(10)  | -28(9)  | 8(11)    |
| C(26) | 108(12) | 130(14) | 118(12) | -100(11) | -12(10) | -16(10)  |
| C(27) | 62(10)  | 147(15) | 42(7)   | -21(8)   | -2(6)   | -75(11)  |
| C(28) | 102(12) | 80(11)  | 173(14) | -58(10)  | -31(11) | -47(10)  |
| C(30) | 77(11)  | 78(11)  | 136(13) | -36(10)  | 8(10)   | -19(10)  |
| C(31) | 96(13)  | 99(13)  | 69(9)   | -22(9)   | 9(9)    | -57(11)  |
| C(32) | 37(9)   | 150(15) | 39(7)   | 24(10)   | -4(6)   | 13(10)   |
| C(33) | 35(7)   | 63(8)   | 35(6)   | -10(6)   | 0(5)    | -24(6)   |
| C(34) | 76(9)   | 63(9)   | 44(7)   | -7(7)    | -4(6)   | -39(8)   |
| C(35) | 76(9)   | 62(9)   | 50(7)   | -1(7)    | -3(7)   | -43(8)   |
| C(36) | 62(8)   | 73(10)  | 31(6)   | -3(7)    | 2(6)    | -30(8)   |
| C(37) | 50(8)   | 62(9)   | 43(7)   | -10(7)   | -2(6)   | -20(7)   |
| C(38) | 42(7)   | 58(8)   | 32(6)   | -3(6)    | -12(5)  | -14(6)   |
| C(39) | 53(8)   | 94(10)  | 69(8)   | -23(8)   | 22(6)   | -45(8)   |
| C(40) | 26(6)   | 107(10) | 56(7)   | -18(7)   | -4(5)   | -33(7)   |
| C(41) | 49(8)   | 125(12) | 50(7)   | -39(8)   | 17(6)   | -51(8)   |
| C(44) | 160(16) | 350(20) | 65(9)   | -75(12)  | 38(9)   | -175(17) |
| C(45) | 94(12)  | 300(20) | 77(9)   | -85(12)  | 34(8)   | -106(13) |

---

Table 5. Hydrogen coordinates ( $\times 10^4$ ) and isotropic displacement parameters ( $\text{\AA}^2 \times 10^3$ ) for 5.

|        | x     | y     | z     | U(eq) |
|--------|-------|-------|-------|-------|
| H(1A)  | 1811  | 2933  | 10517 | 107   |
| H(2A)  | -72   | 3173  | 11524 | 92    |
| H(4A)  | -2411 | 3098  | 11233 | 65    |
| H(5A)  | -3543 | 3039  | 10069 | 56    |
| H(6A)  | -2615 | 2809  | 8647  | 56    |
| H(8A)  | 233   | 6223  | 6495  | 81    |
| H(9A)  | 568   | 7956  | 6224  | 78    |
| H(11A) | 2748  | 8260  | 6600  | 86    |
| H(12A) | 4754  | 7210  | 7201  | 83    |
| H(13A) | 5488  | 5253  | 7761  | 73    |
| H(16A) | -418  | 3550  | 5635  | 123   |
| H(17A) | -1493 | 5451  | 4959  | 111   |
| H(18A) | -2494 | 7012  | 5756  | 100   |
| H(19A) | -2640 | 6583  | 7289  | 78    |
| H(20A) | -1724 | 4737  | 7983  | 70    |
| H(22A) | 2442  | 1816  | 6665  | 131   |
| H(23A) | 3789  | 822   | 5537  | 161   |
| H(24A) | 2996  | 80    | 4607  | 129   |
| H(25A) | 1038  | 12    | 4943  | 132   |
| H(26A) | -147  | 854   | 6163  | 145   |
| H(28A) | 7782  | 1335  | 7826  | 130   |
| H(29A) | 8937  | -665  | 7745  | 146   |
| H(30A) | 8001  | -1772 | 7433  | 121   |
| H(31A) | 5850  | -864  | 7120  | 99    |
| H(32A) | 4692  | 1161  | 7276  | 121   |
| H(34A) | 5332  | 1187  | 9149  | 69    |
| H(35A) | 4882  | 970   | 10677 | 71    |
| H(36A) | 3982  | 2565  | 11441 | 67    |
| H(37A) | 3487  | 4401  | 10692 | 64    |
| H(38A) | 3915  | 4616  | 9091  | 56    |
| H(39A) | 1480  | 2545  | 8214  | 81    |

|        |      |       |      |     |
|--------|------|-------|------|-----|
| H(39B) | 2531 | 2463  | 8852 | 81  |
| H(40A) | 460  | 4695  | 8277 | 72  |
| H(40B) | 1774 | 4477  | 8676 | 72  |
| H(41A) | 2878 | 3576  | 7341 | 82  |
| H(41B) | 1503 | 4023  | 6936 | 82  |
| H(42A) | 737  | -1250 | 7970 | 249 |
| H(42B) | 1372 | -680  | 7156 | 249 |
| H(42C) | -146 | -62   | 7362 | 249 |
| H(43A) | 2876 | -1119 | 8523 | 237 |
| H(43B) | 2730 | 46    | 8863 | 237 |
| H(43C) | 2847 | -42   | 7801 | 237 |
| H(44A) | 5030 | 3140  | 4783 | 245 |
| H(44B) | 3878 | 3402  | 5535 | 245 |
| H(44C) | 5134 | 2175  | 5637 | 245 |
| H(45A) | 7321 | 2904  | 5114 | 216 |
| H(45B) | 7327 | 1896  | 5902 | 216 |
| H(45C) | 7654 | 2900  | 6120 | 216 |

---

**S7 X-ray structure data for compound 6.**

Diagrams showing the structure of compound **6** with labeling schemes:

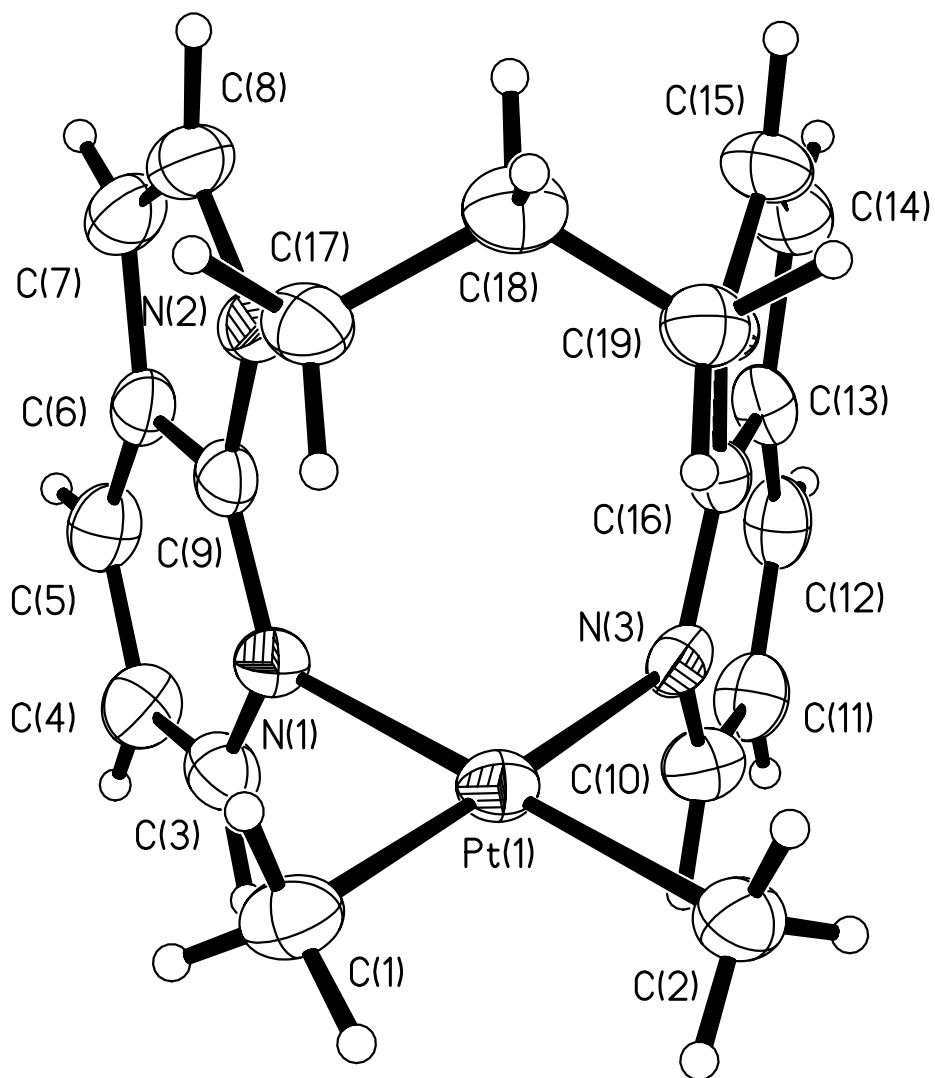

Table 1. Crystal data and structure refinement for compound **6**.

|                                   |                                                                |                 |
|-----------------------------------|----------------------------------------------------------------|-----------------|
| Identification code               | <b>6</b>                                                       |                 |
| Empirical formula                 | C <sub>38</sub> H <sub>44</sub> N <sub>8</sub> Pt <sub>2</sub> |                 |
| Formula weight                    | 1002.99                                                        |                 |
| Temperature                       | 180(2) K                                                       |                 |
| Wavelength                        | 0.71073 Å                                                      |                 |
| Crystal system                    | Triclinic                                                      |                 |
| Space group                       | P-1                                                            |                 |
| Unit cell dimensions              | a = 7.9960(11) Å                                               | α = 84.184(2)°. |
|                                   | b = 9.6192(13) Å                                               | β = 72.328(2)°. |
|                                   | c = 11.9856(16) Å                                              | γ = 87.362(2)°. |
| Volume                            | 873.7(2) Å <sup>3</sup>                                        |                 |
| Z                                 | 1                                                              |                 |
| Density (calculated)              | 1.906 Mg/m <sup>3</sup>                                        |                 |
| Absorption coefficient            | 8.037 mm <sup>-1</sup>                                         |                 |
| F(000)                            | 484                                                            |                 |
| Crystal size                      | 0.20 x 0.15 x 0.10 mm <sup>3</sup>                             |                 |
| Theta range for data collection   | 1.79 to 27.00°.                                                |                 |
| Index ranges                      | -10 ≤ h ≤ 10, -12 ≤ k ≤ 12, -15 ≤ l ≤ 14                       |                 |
| Reflections collected             | 6093                                                           |                 |
| Independent reflections           | 3768 [R(int) = 0.0251]                                         |                 |
| Completeness to theta = 27.00°    | 98.6 %                                                         |                 |
| Absorption correction             | Semi-empirical from equivalents                                |                 |
| Max. and min. transmission        | 0.5004 and 0.2963                                              |                 |
| Refinement method                 | Full-matrix least-squares on F <sup>2</sup>                    |                 |
| Data / restraints / parameters    | 3768 / 0 / 219                                                 |                 |
| Goodness-of-fit on F <sup>2</sup> | 0.924                                                          |                 |
| Final R indices [I > 2σ(I)]       | R1 = 0.0319, wR2 = 0.0621                                      |                 |
| R indices (all data)              | R1 = 0.0420, wR2 = 0.0645                                      |                 |
| Largest diff. peak and hole       | 1.738 and -1.085 e.Å <sup>-3</sup>                             |                 |



Table 2. Atomic coordinates ( $\times 10^4$ ) and equivalent isotropic displacement parameters ( $\text{\AA}^2 \times 10^3$ ) for compound **6**.  $U(\text{eq})$  is defined as one third of the trace of the orthogonalized  $U^{ij}$  tensor.

|       | x        | y        | z       | U(eq) |
|-------|----------|----------|---------|-------|
| Pt(1) | 2545(1)  | 8396(1)  | 2648(1) | 27(1) |
| C(1)  | 2749(7)  | 8789(7)  | 4229(5) | 37(2) |
| C(2)  | 3682(7)  | 10245(6) | 1930(6) | 38(2) |
| C(3)  | 2619(8)  | 5285(7)  | 3178(5) | 33(1) |
| C(4)  | 2194(8)  | 3900(6)  | 3208(5) | 37(2) |
| C(5)  | 462(8)   | 3533(7)  | 3378(5) | 37(2) |
| C(6)  | -793(7)  | 4595(6)  | 3537(5) | 29(1) |
| C(7)  | -2636(8) | 4685(7)  | 3734(5) | 40(2) |
| C(8)  | -3121(7) | 6042(7)  | 3835(5) | 36(2) |
| C(9)  | -225(7)  | 5988(6)  | 3507(4) | 27(1) |
| C(10) | 3671(7)  | 7088(7)  | 346(5)  | 36(1) |
| C(11) | 3557(8)  | 6299(7)  | -519(5) | 37(2) |
| C(12) | 1997(8)  | 6213(7)  | -762(5) | 37(2) |
| C(13) | 580(7)   | 6991(6)  | -146(5) | 31(1) |
| C(14) | -1178(8) | 7246(7)  | -168(5) | 39(2) |
| C(15) | -1878(8) | 8189(7)  | 613(6)  | 40(2) |
| C(16) | 826(7)   | 7820(6)  | 705(5)  | 27(1) |
| C(17) | -1823(7) | 8292(7)  | 3990(5) | 34(1) |
| C(18) | -2414(7) | 9317(6)  | 3107(5) | 36(2) |
| C(19) | -1038(7) | 9669(6)  | 1941(5) | 32(1) |
| N(1)  | 1448(6)  | 6358(5)  | 3307(4) | 29(1) |
| N(2)  | -1664(6) | 6851(5)  | 3691(4) | 29(1) |
| N(3)  | 2326(6)  | 7845(5)  | 1004(4) | 27(1) |
| N(4)  | -695(6)  | 8538(5)  | 1170(4) | 30(1) |

Table 3. Bond lengths [Å] and angles [°] for compound **6**.

|                 |          |                   |           |
|-----------------|----------|-------------------|-----------|
| Pt(1)-C(2)      | 2.023(6) | N(3)-Pt(1)-N(1)   | 83.75(17) |
| Pt(1)-C(1)      | 2.025(5) | N(1)-C(3)-C(4)    | 124.3(5)  |
| Pt(1)-N(3)      | 2.150(4) | C(3)-C(4)-C(5)    | 120.3(6)  |
| Pt(1)-N(1)      | 2.159(5) | C(6)-C(5)-C(4)    | 117.5(6)  |
| C(3)-N(1)       | 1.349(7) | C(5)-C(6)-C(7)    | 135.7(6)  |
| C(3)-C(4)       | 1.384(8) | C(5)-C(6)-C(9)    | 117.9(5)  |
| C(4)-C(5)       | 1.394(8) | C(7)-C(6)-C(9)    | 106.3(5)  |
| C(5)-C(6)       | 1.384(8) | C(8)-C(7)-C(6)    | 107.4(5)  |
| C(6)-C(7)       | 1.420(8) | C(7)-C(8)-N(2)    | 110.2(5)  |
| C(6)-C(9)       | 1.427(8) | N(1)-C(9)-N(2)    | 127.0(5)  |
| C(7)-C(8)       | 1.352(9) | N(1)-C(9)-C(6)    | 125.0(5)  |
| C(8)-N(2)       | 1.388(7) | N(2)-C(9)-C(6)    | 107.9(5)  |
| C(9)-N(1)       | 1.344(6) | N(3)-C(10)-C(11)  | 124.7(5)  |
| C(9)-N(2)       | 1.362(7) | C(10)-C(11)-C(12) | 120.4(6)  |
| C(10)-N(3)      | 1.356(7) | C(11)-C(12)-C(13) | 118.0(6)  |
| C(10)-C(11)     | 1.371(8) | C(12)-C(13)-C(16) | 118.0(5)  |
| C(11)-C(12)     | 1.372(8) | C(12)-C(13)-C(14) | 135.6(5)  |
| C(12)-C(13)     | 1.384(8) | C(16)-C(13)-C(14) | 106.4(5)  |
| C(13)-C(16)     | 1.420(8) | C(15)-C(14)-C(13) | 106.5(5)  |
| C(13)-C(14)     | 1.423(8) | C(14)-C(15)-N(4)  | 111.4(5)  |
| C(14)-C(15)     | 1.349(9) | N(3)-C(16)-N(4)   | 126.9(5)  |
| C(15)-N(4)      | 1.383(6) | N(3)-C(16)-C(13)  | 124.5(5)  |
| C(16)-N(3)      | 1.354(6) | N(4)-C(16)-C(13)  | 108.5(4)  |
| C(16)-N(4)      | 1.363(7) | N(2)-C(17)-C(18)  | 113.4(5)  |
| C(17)-N(2)      | 1.457(7) | C(19)-C(18)-C(17) | 115.7(5)  |
| C(17)-C(18)     | 1.538(8) | N(4)-C(19)-C(18)  | 113.3(5)  |
| C(18)-C(19)     | 1.510(8) | C(9)-N(1)-C(3)    | 114.9(5)  |
| C(19)-N(4)      | 1.460(7) | C(9)-N(1)-Pt(1)   | 126.7(4)  |
|                 |          | C(3)-N(1)-Pt(1)   | 115.4(4)  |
| C(2)-Pt(1)-C(1) | 89.9(3)  | C(9)-N(2)-C(8)    | 108.1(5)  |
| C(2)-Pt(1)-N(3) | 93.3(2)  | C(9)-N(2)-C(17)   | 128.1(4)  |
| C(1)-Pt(1)-N(3) | 176.5(2) | C(8)-N(2)-C(17)   | 122.1(5)  |
| C(2)-Pt(1)-N(1) | 176.0(2) | C(16)-N(3)-C(10)  | 114.2(5)  |
| C(1)-Pt(1)-N(1) | 93.0(2)  | C(16)-N(3)-Pt(1)  | 126.2(4)  |

|                  |          |                  |          |
|------------------|----------|------------------|----------|
| C(10)-N(3)-Pt(1) | 116.9(3) | C(16)-N(4)-C(19) | 129.6(4) |
| C(16)-N(4)-C(15) | 107.1(5) | C(15)-N(4)-C(19) | 122.3(5) |

Table 4. Anisotropic displacement parameters ( $\text{\AA}^2 \times 10^3$ ) for compound **6**. The anisotropic displacement factor exponent takes the form:  $-2\pi^2 [ h^2 a^{*2} U^{11} + \dots + 2 h k a^* b^* U^{12} ]$

|       | $U^{11}$ | $U^{22}$ | $U^{33}$ | $U^{23}$ | $U^{13}$ | $U^{12}$ |
|-------|----------|----------|----------|----------|----------|----------|
| Pt(1) | 25(1)    | 26(1)    | 32(1)    | -5(1)    | -9(1)    | 0(1)     |
| C(1)  | 28(3)    | 46(4)    | 38(4)    | -12(3)   | -6(3)    | -2(3)    |
| C(2)  | 32(3)    | 32(4)    | 50(4)    | 3(3)     | -16(3)   | 0(3)     |
| C(3)  | 33(3)    | 36(4)    | 31(3)    | -3(3)    | -10(3)   | 6(3)     |
| C(4)  | 39(3)    | 25(4)    | 44(4)    | -2(3)    | -8(3)    | 5(3)     |
| C(5)  | 46(4)    | 31(4)    | 34(4)    | -3(3)    | -9(3)    | -6(3)    |
| C(6)  | 33(3)    | 32(4)    | 23(3)    | -1(3)    | -7(2)    | -6(3)    |
| C(7)  | 35(3)    | 49(5)    | 36(4)    | -2(3)    | -8(3)    | -15(3)   |
| C(8)  | 27(3)    | 45(4)    | 36(4)    | -5(3)    | -7(3)    | -5(3)    |
| C(9)  | 30(3)    | 31(4)    | 19(3)    | -1(2)    | -6(2)    | 1(3)     |
| C(10) | 30(3)    | 36(4)    | 40(4)    | -4(3)    | -9(3)    | -1(3)    |
| C(11) | 42(4)    | 36(4)    | 29(3)    | -7(3)    | -3(3)    | 2(3)     |
| C(12) | 54(4)    | 30(4)    | 27(3)    | -3(3)    | -12(3)   | -7(3)    |
| C(13) | 40(3)    | 26(3)    | 29(3)    | 1(3)     | -14(3)   | 0(3)     |
| C(14) | 42(4)    | 41(4)    | 42(4)    | -4(3)    | -22(3)   | -7(3)    |
| C(15) | 31(3)    | 47(5)    | 48(4)    | -1(3)    | -21(3)   | -3(3)    |
| C(16) | 28(3)    | 23(3)    | 29(3)    | 5(2)     | -8(2)    | -1(2)    |
| C(17) | 29(3)    | 44(4)    | 30(3)    | -9(3)    | -8(3)    | 7(3)     |
| C(18) | 32(3)    | 30(4)    | 46(4)    | -11(3)   | -11(3)   | 5(3)     |
| C(19) | 31(3)    | 27(4)    | 40(4)    | -4(3)    | -12(3)   | 1(3)     |
| N(1)  | 25(2)    | 33(3)    | 30(3)    | -2(2)    | -8(2)    | 1(2)     |
| N(2)  | 26(2)    | 33(3)    | 28(3)    | -3(2)    | -6(2)    | -1(2)    |
| N(3)  | 25(2)    | 26(3)    | 27(3)    | 2(2)     | -3(2)    | -5(2)    |
| N(4)  | 27(2)    | 34(3)    | 32(3)    | -4(2)    | -13(2)   | 1(2)     |

Table 5. Hydrogen coordinates ( $\times 10^4$ ) and isotropic displacement parameters ( $\text{\AA}^2 \times 10^3$ ) for compound **6**.

|        | x     | y     | z     | U(eq) |
|--------|-------|-------|-------|-------|
| H(1A)  | 3656  | 9487  | 4114  | 56    |
| H(1B)  | 3069  | 7925  | 4628  | 56    |
| H(1C)  | 1621  | 9147  | 4711  | 56    |
| H(2A)  | 2783  | 10989 | 2045  | 57    |
| H(2B)  | 4254  | 10195 | 1086  | 57    |
| H(2C)  | 4558  | 10445 | 2310  | 57    |
| H(3A)  | 3814  | 5494  | 3059  | 40    |
| H(4A)  | 3087  | 3197  | 3113  | 44    |
| H(5A)  | 155   | 2590  | 3383  | 45    |
| H(7A)  | -3389 | 3930  | 3786  | 48    |
| H(8A)  | -4291 | 6393  | 3982  | 44    |
| H(10A) | 4771  | 7105  | 494   | 43    |
| H(11A) | 4565  | 5808  | -952  | 45    |
| H(12A) | 1893  | 5637  | -1335 | 44    |
| H(14A) | -1747 | 6833  | -639  | 47    |
| H(15A) | -3036 | 8566  | 761   | 48    |
| H(17A) | -674  | 8589  | 4028  | 41    |
| H(17B) | -2680 | 8338  | 4780  | 41    |
| H(18A) | -3433 | 8915  | 2954  | 43    |
| H(18B) | -2819 | 10196 | 3476  | 43    |
| H(19A) | -1428 | 10512 | 1536  | 39    |
| H(19B) | 69    | 9894  | 2087  | 39    |

**S8 X-ray structure data for compound 7.**

Diagrams showing the structure of compound 7 with labeling schemes:

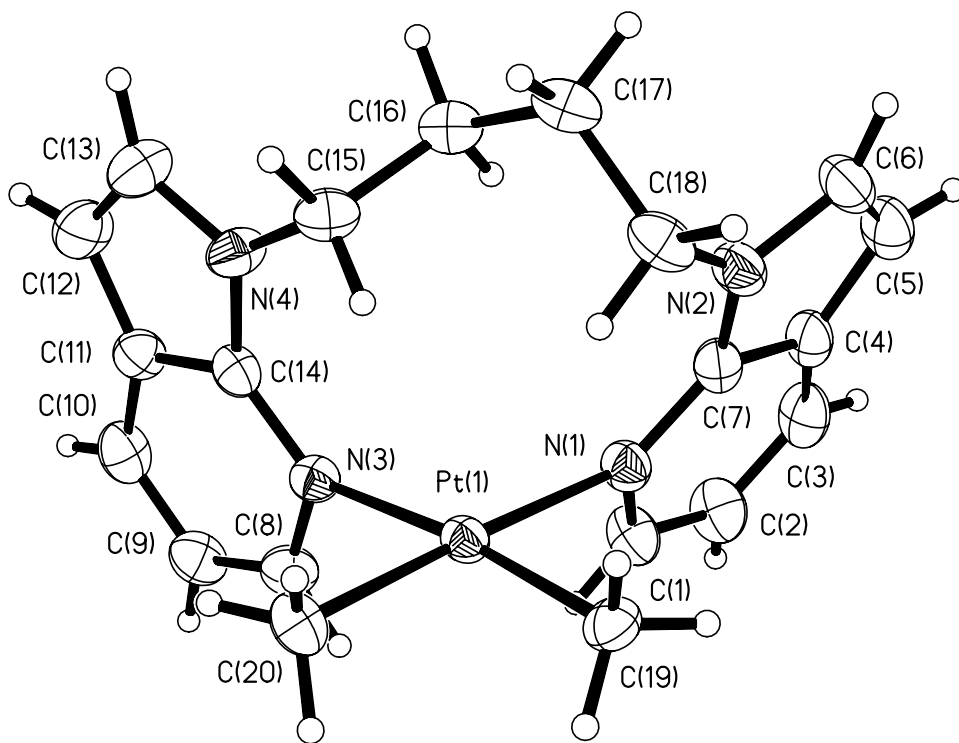

Table 1. Crystal data and structure refinement for **7**.

|                                   |                                                   |                   |
|-----------------------------------|---------------------------------------------------|-------------------|
| Identification code               | 7                                                 |                   |
| Empirical formula                 | C <sub>20</sub> H <sub>24</sub> N <sub>4</sub> Pt |                   |
| Formula weight                    | 515.52                                            |                   |
| Temperature                       | 180(2) K                                          |                   |
| Wavelength                        | 0.71073 Å                                         |                   |
| Crystal system                    | Triclinic                                         |                   |
| Space group                       | P-1                                               |                   |
| Unit cell dimensions              | a = 8.0310(7) Å                                   | α = 82.4630(10)°. |
|                                   | b = 10.7070(8) Å                                  | β = 85.1300(10)°. |
|                                   | c = 13.8631(11) Å                                 | γ = 83.6180(10)°. |
| Volume                            | 1171.44(16) Å <sup>3</sup>                        |                   |
| Z                                 | 2                                                 |                   |
| Density (calculated)              | 1.462 Mg/m <sup>3</sup>                           |                   |
| Absorption coefficient            | 5.997 mm <sup>-1</sup>                            |                   |
| F(000)                            | 500                                               |                   |
| Crystal size                      | 0.30 x 0.20 x 0.20 mm <sup>3</sup>                |                   |
| Theta range for data collection   | 1.49 to 26.00°.                                   |                   |
| Index ranges                      | -9 ≤ h ≤ 9, -12 ≤ k ≤ 13, -17 ≤ l ≤ 15            |                   |
| Reflections collected             | 7432                                              |                   |
| Independent reflections           | 4542 [R(int) = 0.0171]                            |                   |
| Completeness to theta = 26.00°    | 98.8 %                                            |                   |
| Absorption correction             | Semi-empirical from equivalents                   |                   |
| Max. and min. transmission        | 0.3801 and 0.2663                                 |                   |
| Refinement method                 | Full-matrix least-squares on F <sup>2</sup>       |                   |
| Data / restraints / parameters    | 4542 / 0 / 228                                    |                   |
| Goodness-of-fit on F <sup>2</sup> | 0.979                                             |                   |
| Final R indices [I > 2σ(I)]       | R1 = 0.0190, wR2 = 0.0405                         |                   |
| R indices (all data)              | R1 = 0.0213, wR2 = 0.0407                         |                   |
| Largest diff. peak and hole       | 1.229 and -0.682 e.Å <sup>-3</sup>                |                   |

Table 2. Atomic coordinates ( $\times 10^4$ ) and equivalent isotropic displacement parameters ( $\text{\AA}^2 \times 10^3$ ) for **7**.  
 $U(\text{eq})$  is defined as one third of the trace of the orthogonalized  $U^{ij}$  tensor.

|       | x        | y       | z       | U(eq) |
|-------|----------|---------|---------|-------|
| Pt(1) | 313(1)   | 1393(1) | 2923(1) | 22(1) |
| N(1)  | 181(3)   | 3413(2) | 2956(2) | 27(1) |
| N(2)  | -1693(4) | 3816(2) | 4397(2) | 30(1) |
| N(3)  | -904(3)  | 1648(2) | 1567(2) | 24(1) |
| N(4)  | -3853(4) | 1430(3) | 2087(2) | 30(1) |
| C(1)  | 1132(5)  | 4011(3) | 2237(2) | 33(1) |
| C(2)  | 1274(5)  | 5312(3) | 2110(3) | 39(1) |
| C(3)  | 413(5)   | 6064(3) | 2756(3) | 39(1) |
| C(4)  | -569(5)  | 5497(3) | 3516(3) | 32(1) |
| C(5)  | -1602(5) | 5928(3) | 4312(3) | 40(1) |
| C(6)  | -2254(5) | 4908(3) | 4820(3) | 38(1) |
| C(7)  | -647(4)  | 4165(3) | 3592(2) | 27(1) |
| C(8)  | 135(5)   | 1760(3) | 748(2)  | 32(1) |
| C(9)  | -354(5)  | 1787(3) | -188(2) | 36(1) |
| C(10) | -2013(5) | 1705(3) | -337(3) | 37(1) |
| C(11) | -3143(4) | 1592(3) | 466(2)  | 30(1) |
| C(12) | -4892(5) | 1487(3) | 624(3)  | 40(1) |
| C(13) | -5263(5) | 1390(3) | 1596(3) | 42(1) |
| C(14) | -2506(4) | 1559(3) | 1405(2) | 27(1) |
| C(15) | -3838(5) | 1349(3) | 3151(2) | 31(1) |
| C(16) | -4400(5) | 2611(3) | 3520(2) | 33(1) |
| C(17) | -4093(4) | 2533(3) | 4603(2) | 36(1) |
| C(18) | -2262(4) | 2589(3) | 4783(2) | 33(1) |
| C(19) | 1650(4)  | 1040(3) | 4128(2) | 28(1) |
| C(20) | 535(5)   | -505(3) | 2859(2) | 32(1) |

Table 3. Bond lengths [Å] and angles [°] for **7**.

|                   |            |                   |           |
|-------------------|------------|-------------------|-----------|
| Pt(1)-C(19)       | 2.033(3)   | C(20)-Pt(1)-N(3)  | 88.13(11) |
| Pt(1)-C(20)       | 2.034(3)   | N(1)-Pt(1)-N(3)   | 91.82(9)  |
| Pt(1)-N(1)        | 2.160(2)   | C(1)-N(1)-C(7)    | 115.0(3)  |
| Pt(1)-N(3)        | 2.165(3)   | C(1)-N(1)-Pt(1)   | 113.8(2)  |
| N(1)-C(1)         | 1.341(4)   | C(7)-N(1)-Pt(1)   | 131.2(2)  |
| N(1)-C(7)         | 1.354(4)   | C(7)-N(2)-C(6)    | 107.1(3)  |
| N(2)-C(7)         | 1.376(4)   | C(7)-N(2)-C(18)   | 130.8(2)  |
| N(2)-C(6)         | 1.389(4)   | C(6)-N(2)-C(18)   | 122.0(3)  |
| N(2)-C(18)        | 1.459(4)   | C(14)-N(3)-C(8)   | 114.0(3)  |
| N(3)-C(14)        | 1.340(4)   | C(14)-N(3)-Pt(1)  | 130.0(2)  |
| N(3)-C(8)         | 1.351(4)   | C(8)-N(3)-Pt(1)   | 115.4(2)  |
| N(4)-C(13)        | 1.377(4)   | C(13)-N(4)-C(14)  | 108.0(3)  |
| N(4)-C(14)        | 1.382(4)   | C(13)-N(4)-C(15)  | 124.6(3)  |
| N(4)-C(15)        | 1.467(4)   | C(14)-N(4)-C(15)  | 127.4(3)  |
| C(1)-C(2)         | 1.397(4)   | N(1)-C(1)-C(2)    | 124.6(3)  |
| C(2)-C(3)         | 1.374(5)   | C(3)-C(2)-C(1)    | 119.7(3)  |
| C(3)-C(4)         | 1.378(5)   | C(2)-C(3)-C(4)    | 118.2(3)  |
| C(4)-C(5)         | 1.418(5)   | C(3)-C(4)-C(5)    | 134.9(3)  |
| C(4)-C(7)         | 1.424(4)   | C(3)-C(4)-C(7)    | 118.5(3)  |
| C(5)-C(6)         | 1.351(5)   | C(5)-C(4)-C(7)    | 106.6(3)  |
| C(8)-C(9)         | 1.384(5)   | C(6)-C(5)-C(4)    | 107.2(3)  |
| C(9)-C(10)        | 1.380(5)   | C(5)-C(6)-N(2)    | 110.9(3)  |
| C(10)-C(11)       | 1.377(5)   | N(1)-C(7)-N(2)    | 127.8(3)  |
| C(11)-C(12)       | 1.417(5)   | N(1)-C(7)-C(4)    | 124.0(3)  |
| C(11)-C(14)       | 1.433(4)   | N(2)-C(7)-C(4)    | 108.2(3)  |
| C(12)-C(13)       | 1.349(5)   | N(3)-C(8)-C(9)    | 124.8(3)  |
| C(15)-C(16)       | 1.516(4)   | C(10)-C(9)-C(8)   | 120.1(3)  |
| C(16)-C(17)       | 1.531(5)   | C(11)-C(10)-C(9)  | 118.2(3)  |
| C(17)-C(18)       | 1.521(5)   | C(10)-C(11)-C(12) | 135.5(3)  |
|                   |            | C(10)-C(11)-C(14) | 117.4(3)  |
| C(19)-Pt(1)-C(20) | 88.13(13)  | C(12)-C(11)-C(14) | 107.1(3)  |
| C(19)-Pt(1)-N(1)  | 91.72(11)  | C(13)-C(12)-C(11) | 106.9(3)  |
| C(20)-Pt(1)-N(1)  | 177.54(12) | C(12)-C(13)-N(4)  | 111.2(3)  |
| C(19)-Pt(1)-N(3)  | 174.07(11) | N(3)-C(14)-N(4)   | 127.7(3)  |



|                  |          |                   |          |
|------------------|----------|-------------------|----------|
| N(3)-C(14)-C(11) | 125.5(3) | C(15)-C(16)-C(17) | 110.1(3) |
| N(4)-C(14)-C(11) | 106.8(3) | C(18)-C(17)-C(16) | 113.3(3) |
| N(4)-C(15)-C(16) | 112.2(3) | N(2)-C(18)-C(17)  | 111.6(3) |

---

Symmetry transformations used to generate equivalent atoms:

Table 4. Anisotropic displacement parameters ( $\text{\AA}^2 \times 10^3$ ) for **7**. The anisotropic displacement factor exponent takes the form:  $-2\pi^2 [ h^2 a^{*2} U^{11} + \dots + 2 h k a^* b^* U^{12} ]$

|       | $U^{11}$ | $U^{22}$ | $U^{33}$ | $U^{23}$ | $U^{13}$ | $U^{12}$ |
|-------|----------|----------|----------|----------|----------|----------|
| Pt(1) | 23(1)    | 19(1)    | 24(1)    | -3(1)    | 1(1)     | -2(1)    |
| N(1)  | 29(2)    | 23(1)    | 29(2)    | -4(1)    | -2(1)    | -1(1)    |
| N(2)  | 31(2)    | 27(1)    | 32(2)    | -8(1)    | -3(1)    | 4(1)     |
| N(3)  | 24(2)    | 23(1)    | 23(2)    | -1(1)    | 2(1)     | -3(1)    |
| N(4)  | 23(2)    | 41(2)    | 26(2)    | -1(1)    | -1(1)    | -5(1)    |
| C(1)  | 43(2)    | 27(2)    | 30(2)    | -4(2)    | 4(2)     | -8(2)    |
| C(2)  | 50(3)    | 26(2)    | 41(2)    | 1(2)     | -1(2)    | -11(2)   |
| C(3)  | 49(3)    | 22(2)    | 46(2)    | -3(2)    | -13(2)   | -6(2)    |
| C(4)  | 36(2)    | 22(2)    | 39(2)    | -8(2)    | -14(2)   | 4(2)     |
| C(5)  | 44(2)    | 30(2)    | 48(2)    | -15(2)   | -15(2)   | 9(2)     |
| C(6)  | 38(2)    | 42(2)    | 35(2)    | -18(2)   | -6(2)    | 10(2)    |
| C(7)  | 31(2)    | 23(2)    | 28(2)    | -3(1)    | -9(2)    | 2(2)     |
| C(8)  | 30(2)    | 35(2)    | 30(2)    | -3(2)    | 2(2)     | -1(2)    |
| C(9)  | 39(2)    | 42(2)    | 25(2)    | -6(2)    | 5(2)     | -2(2)    |
| C(10) | 49(3)    | 33(2)    | 28(2)    | -4(2)    | -9(2)    | 0(2)     |
| C(11) | 29(2)    | 31(2)    | 29(2)    | -4(1)    | -4(2)    | 1(2)     |
| C(12) | 34(2)    | 51(2)    | 37(2)    | -7(2)    | -11(2)   | -1(2)    |
| C(13) | 29(2)    | 50(2)    | 47(2)    | -5(2)    | -6(2)    | -7(2)    |
| C(14) | 32(2)    | 23(2)    | 26(2)    | -5(1)    | 0(2)     | -2(2)    |
| C(15) | 27(2)    | 35(2)    | 30(2)    | 0(2)     | 2(2)     | -2(2)    |
| C(16) | 28(2)    | 35(2)    | 36(2)    | -3(2)    | 1(2)     | 0(2)     |
| C(17) | 32(2)    | 40(2)    | 34(2)    | -7(2)    | 7(2)     | 2(2)     |
| C(18) | 39(2)    | 32(2)    | 25(2)    | -2(1)    | 5(2)     | 3(2)     |
| C(19) | 22(2)    | 30(2)    | 33(2)    | -3(1)    | -1(2)    | -7(2)    |

C(20) 39(2) 24(2) 34(2) -7(1) -1(2) -1(2)

---

Table 5. Hydrogen coordinates ( $\times 10^4$ ) and isotropic displacement parameters ( $\text{\AA}^2 \times 10^3$ ) for **7**.

|        | x     | y    | z    | U(eq) |
|--------|-------|------|------|-------|
| H(1A)  | 1752  | 3516 | 1782 | 40    |
| H(2A)  | 1963  | 5676 | 1580 | 47    |
| H(3A)  | 493   | 6950 | 2681 | 46    |
| H(5A)  | -1799 | 6776 | 4460 | 48    |
| H(6A)  | -2996 | 4934 | 5390 | 46    |
| H(8A)  | 1287  | 1826 | 821  | 39    |
| H(9A)  | 454   | 1863 | -729 | 43    |
| H(10A) | -2366 | 1725 | -976 | 44    |
| H(12A) | -5656 | 1486 | 137  | 48    |
| H(13A) | -6355 | 1305 | 1902 | 50    |
| H(15A) | -2687 | 1056 | 3344 | 38    |
| H(15B) | -4590 | 716  | 3460 | 38    |
| H(16A) | -5610 | 2841 | 3430 | 40    |
| H(16B) | -3768 | 3279 | 3141 | 40    |
| H(17A) | -4783 | 3241 | 4883 | 43    |
| H(17B) | -4468 | 1732 | 4947 | 43    |
| H(18A) | -2124 | 2430 | 5493 | 40    |
| H(18B) | -1556 | 1915 | 4469 | 40    |
| H(19A) | 933   | 701  | 4687 | 42    |
| H(19B) | 2043  | 1829 | 4266 | 42    |
| H(19C) | 2618  | 422  | 4013 | 42    |
| H(20A) | -16   | -929 | 3450 | 48    |
| H(20B) | 1727  | -825 | 2809 | 48    |
| H(20C) | 2     | -676 | 2286 | 48    |

---

**S9 X-ray structure data for compound 8.**

Diagrams showing the structure of compound **8** with labeling schemes:

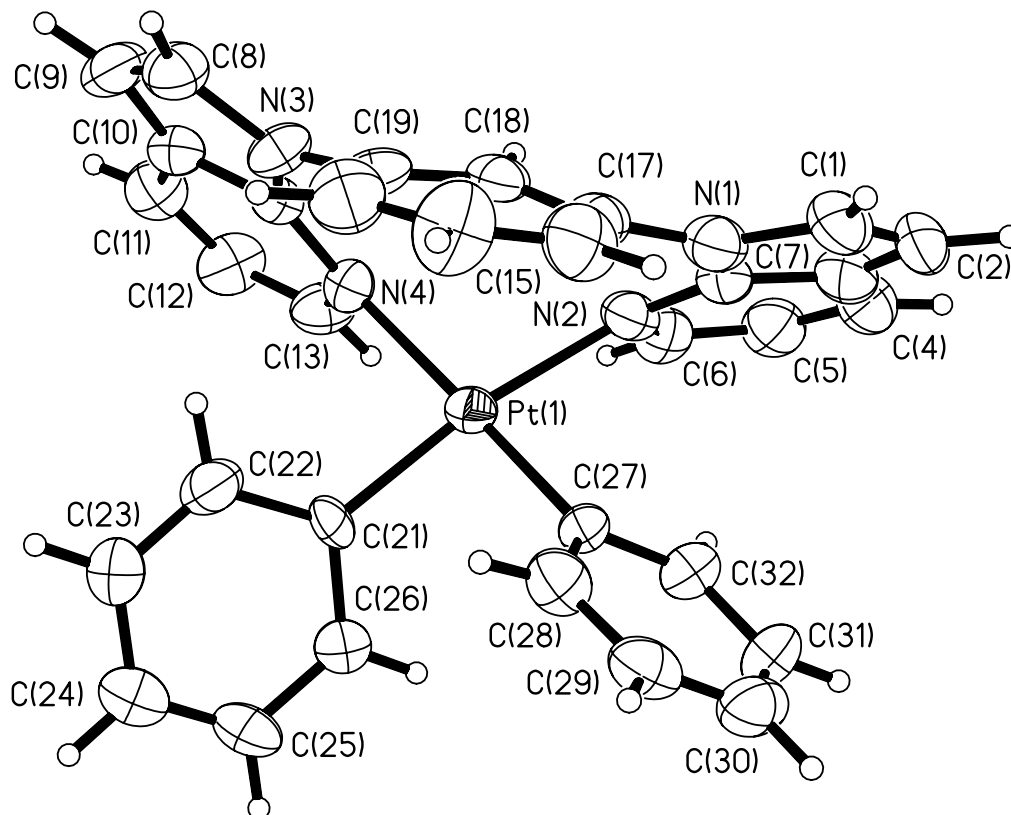

Table 1. Crystal data and structure refinement for compound **8**.

|                                   |                                                   |                  |
|-----------------------------------|---------------------------------------------------|------------------|
| Identification code               | <b>8</b>                                          |                  |
| Empirical formula                 | C <sub>32</sub> H <sub>24</sub> N <sub>4</sub> Pt |                  |
| Formula weight                    | 659.64                                            |                  |
| Temperature                       | 298(2) K                                          |                  |
| Wavelength                        | 0.71073 Å                                         |                  |
| Crystal system                    | Triclinic                                         |                  |
| Space group                       | P-1                                               |                  |
| Unit cell dimensions              | a = 10.778(2) Å                                   | α = 103.297(4)°. |
|                                   | b = 9.984(2) Å                                    | β = 96.241(4)°.  |
|                                   | c = 13.777(3) Å                                   | γ = 115.883(3)°. |
| Volume                            | 1260.4(4) Å <sup>3</sup>                          |                  |
| Z                                 | 2                                                 |                  |
| Density (calculated)              | 1.738 Mg/m <sup>3</sup>                           |                  |
| Absorption coefficient            | 5.595 mm <sup>-1</sup>                            |                  |
| F(000)                            | 644                                               |                  |
| Crystal size                      | 0.40 x 0.40 x 0.30 mm <sup>3</sup>                |                  |
| Theta range for data collection   | 1.56 to 26.00°.                                   |                  |
| Index ranges                      | -13 ≤ h ≤ 12, -12 ≤ k ≤ 12, -16 ≤ l ≤ 16          |                  |
| Reflections collected             | 8109                                              |                  |
| Independent reflections           | 4909 [R(int) = 0.0977]                            |                  |
| Completeness to theta = 26.00°    | 99.2 %                                            |                  |
| Absorption correction             | Semi-empirical from equivalents                   |                  |
| Max. and min. transmission        | 0.2846 and 0.2131                                 |                  |
| Refinement method                 | Full-matrix least-squares on F <sup>2</sup>       |                  |
| Data / restraints / parameters    | 4909 / 0 / 334                                    |                  |
| Goodness-of-fit on F <sup>2</sup> | 1.092                                             |                  |
| Final R indices [I > 2σ(I)]       | R1 = 0.0775, wR2 = 0.2071                         |                  |
| R indices (all data)              | R1 = 0.0791, wR2 = 0.2089                         |                  |
| Largest diff. peak and hole       | 3.384 and -2.846 e.Å <sup>-3</sup>                |                  |

Table 2. Atomic coordinates ( $\times 10^4$ ) and equivalent isotropic displacement parameters ( $\text{\AA}^2 \times 10^3$ ) for compound **8**.  $U(\text{eq})$  is defined as one third of the trace of the orthogonalized  $U^{ij}$  tensor.

|       | x         | y         | z        | $U(\text{eq})$ |
|-------|-----------|-----------|----------|----------------|
| Pt(1) | 5302(1)   | 7241(1)   | 1973(1)  | 34(1)          |
| N(1)  | 8842(10)  | 10063(10) | 3186(7)  | 47(2)          |
| N(2)  | 7331(10)  | 8064(11)  | 1571(7)  | 41(2)          |
| N(3)  | 4761(9)   | 10610(9)  | 2146(6)  | 42(2)          |
| N(4)  | 4393(9)   | 8114(11)  | 957(6)   | 36(2)          |
| C(1)  | 10233(12) | 10634(13) | 3727(10) | 57(3)          |
| C(2)  | 10898(11) | 9958(15)  | 3136(10) | 61(3)          |
| C(3)  | 9884(12)  | 8936(14)  | 2201(10) | 56(3)          |
| C(4)  | 9869(13)  | 7942(16)  | 1309(10) | 60(3)          |
| C(5)  | 8626(14)  | 7092(15)  | 527(9)   | 57(3)          |
| C(6)  | 7404(13)  | 7159(14)  | 702(8)   | 45(2)          |
| C(7)  | 8620(11)  | 8990(12)  | 2271(8)  | 44(2)          |
| C(8)  | 4132(12)  | 11551(12) | 2101(8)  | 48(2)          |
| C(9)  | 3227(13)  | 11037(13) | 1199(9)  | 53(3)          |
| C(10) | 3213(12)  | 9651(13)  | 606(9)   | 44(2)          |
| C(11) | 2445(13)  | 8535(14)  | -346(8)  | 52(2)          |
| C(12) | 2728(13)  | 7326(14)  | -640(8)  | 55(3)          |
| C(13) | 3690(12)  | 7148(12)  | -3(8)    | 47(2)          |
| C(14) | 4188(10)  | 9402(11)  | 1224(7)  | 37(2)          |
| C(15) | 6769(15)  | 11383(17) | 4742(9)  | 68(3)          |
| C(16) | 7800(14)  | 11036(16) | 4522(10) | 58(3)          |
| C(17) | 7851(12)  | 10570(12) | 3491(8)  | 46(2)          |
| C(18) | 6929(10)  | 10599(10) | 2734(7)  | 41(2)          |
| C(19) | 5815(12)  | 10838(10) | 2955(7)  | 43(2)          |
| C(20) | 5731(14)  | 11252(14) | 3984(9)  | 59(3)          |
| C(21) | 3410(9)   | 6131(11)  | 2266(7)  | 32(2)          |
| C(22) | 2483(12)  | 6781(12)  | 2459(8)  | 47(2)          |
| C(23) | 1193(13)  | 5947(17)  | 2652(12) | 62(3)          |
| C(24) | 715(14)   | 4414(15)  | 2676(11) | 62(3)          |
| C(25) | 1543(12)  | 3720(13)  | 2450(10) | 59(3)          |
| C(26) | 2867(11)  | 4565(12)  | 2275(8)  | 47(2)          |

|       |          |          |          |       |
|-------|----------|----------|----------|-------|
| C(27) | 6116(11) | 6519(11) | 2985(8)  | 35(2) |
| C(28) | 5879(12) | 6709(13) | 3971(8)  | 50(2) |
| C(29) | 6493(12) | 6300(13) | 4711(8)  | 52(2) |
| C(30) | 7261(13) | 5555(13) | 4465(9)  | 55(3) |
| C(31) | 7468(15) | 5270(16) | 3483(12) | 58(3) |
| C(32) | 6913(13) | 5749(13) | 2767(9)  | 50(2) |

Table 3. Bond lengths [ $\text{\AA}$ ] and angles [ $^\circ$ ] for compound **8**.

|             |           |                   |           |
|-------------|-----------|-------------------|-----------|
| Pt(1)-C(21) | 1.990(9)  | C(15)-C(16)       | 1.34(2)   |
| Pt(1)-C(27) | 1.996(10) | C(15)-C(20)       | 1.384(18) |
| Pt(1)-N(2)  | 2.161(9)  | C(16)-C(17)       | 1.404(17) |
| Pt(1)-N(4)  | 2.165(8)  | C(17)-C(18)       | 1.375(14) |
| N(1)-C(7)   | 1.373(15) | C(18)-C(19)       | 1.374(15) |
| N(1)-C(1)   | 1.394(14) | C(19)-C(20)       | 1.407(15) |
| N(1)-C(17)  | 1.429(15) | C(21)-C(26)       | 1.413(14) |
| N(2)-C(6)   | 1.358(15) | C(21)-C(22)       | 1.427(14) |
| N(2)-C(7)   | 1.375(14) | C(22)-C(23)       | 1.367(17) |
| N(3)-C(8)   | 1.385(13) | C(23)-C(24)       | 1.396(18) |
| N(3)-C(14)  | 1.387(12) | C(24)-C(25)       | 1.369(19) |
| N(3)-C(19)  | 1.402(13) | C(25)-C(26)       | 1.386(15) |
| N(4)-C(13)  | 1.345(13) | C(27)-C(32)       | 1.394(15) |
| N(4)-C(14)  | 1.374(13) | C(27)-C(28)       | 1.395(15) |
| C(1)-C(2)   | 1.39(2)   | C(28)-C(29)       | 1.387(16) |
| C(2)-C(3)   | 1.418(18) | C(29)-C(30)       | 1.355(18) |
| C(3)-C(4)   | 1.384(19) | C(30)-C(31)       | 1.380(19) |
| C(3)-C(7)   | 1.400(16) | C(31)-C(32)       | 1.378(17) |
| C(4)-C(5)   | 1.397(18) |                   |           |
| C(5)-C(6)   | 1.391(17) | C(21)-Pt(1)-C(27) | 89.3(4)   |
| C(8)-C(9)   | 1.329(17) | C(21)-Pt(1)-N(2)  | 170.4(4)  |
| C(9)-C(10)  | 1.429(15) | C(27)-Pt(1)-N(2)  | 86.1(4)   |
| C(10)-C(11) | 1.391(17) | C(21)-Pt(1)-N(4)  | 89.2(4)   |
| C(10)-C(14) | 1.422(15) | C(27)-Pt(1)-N(4)  | 176.3(3)  |
| C(11)-C(12) | 1.356(17) | N(2)-Pt(1)-N(4)   | 95.9(3)   |
| C(12)-C(13) | 1.382(16) | C(7)-N(1)-C(1)    | 107.5(10) |

|                   |           |                   |           |
|-------------------|-----------|-------------------|-----------|
| C(7)-N(1)-C(17)   | 125.8(9)  | C(18)-C(17)-N(1)  | 117.7(9)  |
| C(1)-N(1)-C(17)   | 126.6(10) | C(16)-C(17)-N(1)  | 122.5(10) |
| C(6)-N(2)-C(7)    | 113.2(10) | C(19)-C(18)-C(17) | 120.3(9)  |
| C(6)-N(2)-Pt(1)   | 116.9(7)  | C(18)-C(19)-N(3)  | 119.2(8)  |
| C(7)-N(2)-Pt(1)   | 124.3(7)  | C(18)-C(19)-C(20) | 119.3(10) |
| C(8)-N(3)-C(14)   | 107.6(8)  | N(3)-C(19)-C(20)  | 121.5(10) |
| C(8)-N(3)-C(19)   | 127.1(8)  | C(15)-C(20)-C(19) | 118.7(12) |
| C(14)-N(3)-C(19)  | 125.3(8)  | C(26)-C(21)-C(22) | 114.3(8)  |
| C(13)-N(4)-C(14)  | 114.1(9)  | C(26)-C(21)-Pt(1) | 120.7(7)  |
| C(13)-N(4)-Pt(1)  | 117.1(7)  | C(22)-C(21)-Pt(1) | 125.0(8)  |
| C(14)-N(4)-Pt(1)  | 127.3(7)  | C(23)-C(22)-C(21) | 121.9(10) |
| C(2)-C(1)-N(1)    | 109.4(11) | C(22)-C(23)-C(24) | 121.7(12) |
| C(1)-C(2)-C(3)    | 106.7(10) | C(25)-C(24)-C(23) | 118.4(12) |
| C(4)-C(3)-C(7)    | 117.2(11) | C(24)-C(25)-C(26) | 120.4(11) |
| C(4)-C(3)-C(2)    | 135.6(12) | C(25)-C(26)-C(21) | 123.3(10) |
| C(7)-C(3)-C(2)    | 107.2(11) | C(32)-C(27)-C(28) | 114.7(10) |
| C(3)-C(4)-C(5)    | 118.9(12) | C(32)-C(27)-Pt(1) | 123.8(8)  |
| C(6)-C(5)-C(4)    | 119.1(11) | C(28)-C(27)-Pt(1) | 121.5(8)  |
| N(2)-C(6)-C(5)    | 124.9(11) | C(29)-C(28)-C(27) | 122.9(11) |
| N(1)-C(7)-N(2)    | 124.5(10) | C(30)-C(29)-C(28) | 120.1(11) |
| N(1)-C(7)-C(3)    | 109.1(10) | C(29)-C(30)-C(31) | 119.0(10) |
| N(2)-C(7)-C(3)    | 126.2(11) | C(32)-C(31)-C(30) | 120.4(12) |
| C(9)-C(8)-N(3)    | 111.3(9)  | C(31)-C(32)-C(27) | 122.5(12) |
| C(8)-C(9)-C(10)   | 107.3(10) |                   |           |
| C(11)-C(10)-C(14) | 117.7(10) |                   |           |
| C(11)-C(10)-C(9)  | 135.4(11) |                   |           |
| C(14)-C(10)-C(9)  | 106.7(10) |                   |           |
| C(12)-C(11)-C(10) | 117.7(10) |                   |           |
| C(11)-C(12)-C(13) | 121.8(10) |                   |           |
| N(4)-C(13)-C(12)  | 123.8(10) |                   |           |
| N(4)-C(14)-N(3)   | 128.3(9)  |                   |           |
| N(4)-C(14)-C(10)  | 124.4(9)  |                   |           |
| N(3)-C(14)-C(10)  | 107.1(9)  |                   |           |
| C(16)-C(15)-C(20) | 122.1(12) |                   |           |
| C(15)-C(16)-C(17) | 119.0(11) |                   |           |
| C(18)-C(17)-C(16) | 119.8(11) |                   |           |

Table 4. Anisotropic displacement parameters ( $\text{\AA}^2 \times 10^3$ ) for compound **8**. The anisotropic displacement factor exponent takes the form:  $-2\pi^2 [ h^2 a^{*2} U^{11} + \dots + 2 h k a^* b^* U^{12} ]$

|       | $U^{11}$ | $U^{22}$ | $U^{33}$ | $U^{23}$ | $U^{13}$ | $U^{12}$ |
|-------|----------|----------|----------|----------|----------|----------|
| Pt(1) | 33(1)    | 27(1)    | 38(1)    | 10(1)    | 7(1)     | 12(1)    |
| N(1)  | 44(5)    | 39(4)    | 51(5)    | 16(4)    | 8(4)     | 14(4)    |
| N(2)  | 38(4)    | 34(4)    | 44(4)    | 14(3)    | 8(3)     | 10(3)    |
| N(3)  | 56(5)    | 31(4)    | 43(4)    | 8(3)     | 11(3)    | 27(4)    |
| N(4)  | 37(4)    | 39(4)    | 36(4)    | 12(3)    | 8(3)     | 20(4)    |
| C(1)  | 39(5)    | 46(6)    | 66(7)    | 19(5)    | -6(5)    | 6(5)     |
| C(2)  | 30(5)    | 63(7)    | 83(8)    | 41(6)    | 2(5)     | 11(5)    |
| C(3)  | 47(6)    | 59(7)    | 68(7)    | 39(6)    | 21(5)    | 21(5)    |
| C(4)  | 52(7)    | 69(8)    | 78(8)    | 39(6)    | 35(6)    | 32(6)    |
| C(5)  | 62(7)    | 65(7)    | 59(6)    | 33(6)    | 30(5)    | 34(6)    |
| C(6)  | 53(6)    | 54(6)    | 36(5)    | 22(4)    | 13(4)    | 28(5)    |
| C(7)  | 38(5)    | 41(5)    | 56(5)    | 26(4)    | 10(4)    | 16(4)    |
| C(8)  | 52(6)    | 36(5)    | 53(6)    | 10(4)    | 13(5)    | 20(5)    |
| C(9)  | 69(7)    | 45(5)    | 64(6)    | 27(5)    | 23(5)    | 36(5)    |
| C(10) | 42(5)    | 39(5)    | 53(6)    | 22(4)    | 13(4)    | 17(4)    |
| C(11) | 55(7)    | 58(6)    | 45(5)    | 21(5)    | 13(5)    | 26(6)    |
| C(12) | 66(7)    | 51(6)    | 38(5)    | 6(4)     | -4(5)    | 25(5)    |
| C(13) | 57(6)    | 35(5)    | 42(5)    | 9(4)     | 5(4)     | 18(5)    |
| C(14) | 34(5)    | 32(4)    | 44(5)    | 14(4)    | 12(4)    | 13(4)    |
| C(15) | 78(9)    | 86(9)    | 40(6)    | 12(6)    | 6(5)     | 46(8)    |
| C(16) | 50(7)    | 63(8)    | 46(6)    | 16(5)    | -4(5)    | 18(6)    |
| C(17) | 44(5)    | 35(5)    | 51(5)    | 14(4)    | 6(4)     | 13(4)    |
| C(18) | 40(5)    | 26(4)    | 49(5)    | 13(4)    | 13(4)    | 9(4)     |
| C(19) | 62(6)    | 25(4)    | 39(4)    | 8(3)     | 11(4)    | 21(4)    |
| C(20) | 62(7)    | 47(6)    | 60(7)    | 5(5)     | 12(5)    | 25(5)    |
| C(21) | 16(4)    | 32(4)    | 35(4)    | 7(3)     | 1(3)     | 4(3)     |
| C(22) | 57(6)    | 43(5)    | 53(5)    | 21(4)    | 16(5)    | 31(5)    |



|       |       |       |       |       |       |       |
|-------|-------|-------|-------|-------|-------|-------|
| C(23) | 44(6) | 63(8) | 89(9) | 34(7) | 16(6) | 29(6) |
| C(24) | 52(7) | 49(6) | 82(8) | 29(6) | 21(6) | 16(5) |
| C(25) | 42(6) | 38(5) | 82(8) | 25(5) | 15(5) | 4(5)  |
| C(26) | 43(5) | 40(5) | 62(6) | 21(4) | 16(5) | 21(4) |
| C(27) | 34(5) | 27(4) | 46(5) | 11(4) | 10(4) | 17(4) |
| C(28) | 44(6) | 52(6) | 47(5) | 15(4) | 10(4) | 18(5) |
| C(29) | 45(6) | 45(5) | 49(5) | 16(4) | 8(4)  | 8(5)  |
| C(30) | 53(6) | 49(6) | 55(6) | 23(5) | -3(5) | 15(5) |
| C(31) | 57(7) | 56(7) | 79(8) | 31(6) | 15(6) | 38(6) |
| C(32) | 52(6) | 45(6) | 63(6) | 24(5) | 15(5) | 28(5) |

Table 5. Hydrogen coordinates ( $\times 10^4$ ) and isotropic displacement parameters ( $\text{\AA}^2 \times 10^3$ ) for compound **8**

|        | x     | y     | z     | U(eq) |
|--------|-------|-------|-------|-------|
| H(1A)  | 10651 | 11356 | 4381  | 69    |
| H(2A)  | 11827 | 10140 | 3318  | 73    |
| H(4A)  | 10674 | 7841  | 1232  | 72    |
| H(5A)  | 8614  | 6489  | -103  | 68    |
| H(6A)  | 6575  | 6538  | 184   | 54    |
| H(8A)  | 4320  | 12430 | 2633  | 58    |
| H(9A)  | 2700  | 11495 | 991   | 64    |
| H(11A) | 1762  | 8616  | -767  | 63    |
| H(12A) | 2262  | 6596  | -1289 | 66    |
| H(13A) | 3861  | 6312  | -252  | 57    |
| H(15A) | 6753  | 11722 | 5427  | 81    |
| H(16A) | 8469  | 11104 | 5044  | 70    |
| H(18A) | 7060  | 10457 | 2069  | 49    |
| H(20A) | 4993  | 11433 | 4151  | 71    |
| H(22A) | 2764  | 7802  | 2453  | 56    |
| H(23A) | 618   | 6413  | 2770  | 74    |
| H(24A) | -144  | 3877  | 2841  | 74    |
| H(25A) | 1216  | 2676  | 2414  | 71    |
| H(26A) | 3424  | 4078  | 2158  | 56    |
| H(28A) | 5283  | 7129  | 4140  | 60    |

|        |      |      |      |    |
|--------|------|------|------|----|
| H(29A) | 6377 | 6537 | 5378 | 62 |
| H(30A) | 7643 | 5240 | 4950 | 67 |
| H(31A) | 7986 | 4752 | 3303 | 69 |
| H(32A) | 7075 | 5551 | 2112 | 60 |

---

**S10 X-ray structure data for compound 9a.**

Diagrams showing the structure of compound **9a** with labeling schemes:

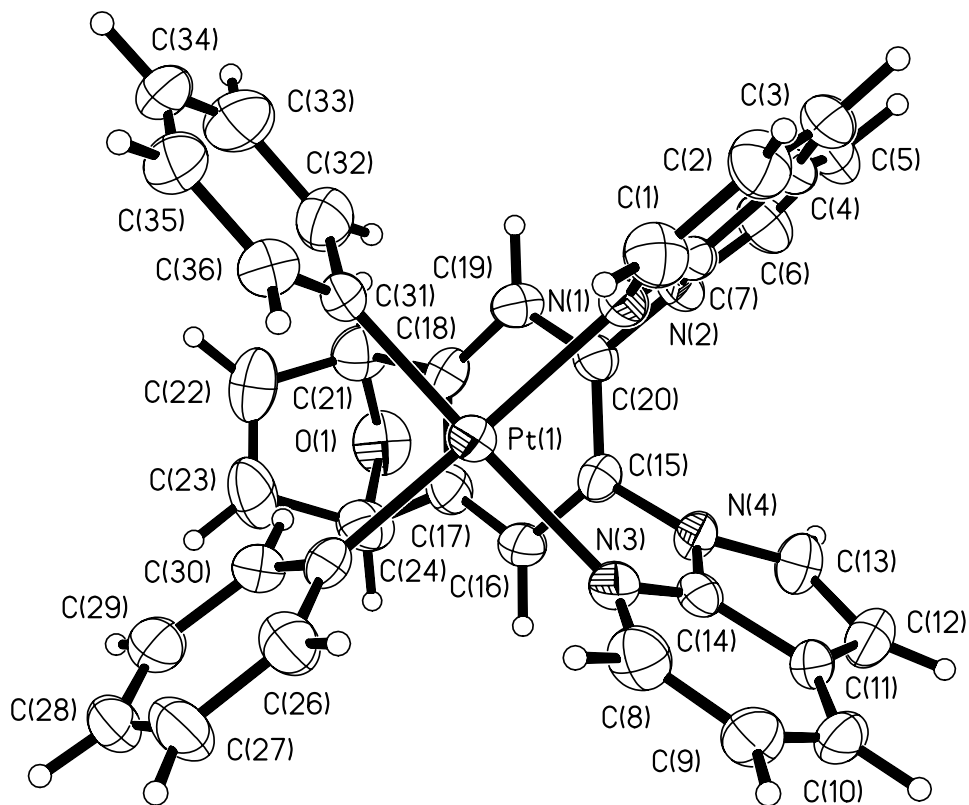

Table 1. Crystal data and structure refinement for compound **9a**.

|                                   |                                                     |                    |
|-----------------------------------|-----------------------------------------------------|--------------------|
| Identification code               | <b>9a</b>                                           |                    |
| Empirical formula                 | C <sub>36</sub> H <sub>26</sub> N <sub>4</sub> O Pt |                    |
| Formula weight                    | 725.70                                              |                    |
| Temperature                       | 180(2) K                                            |                    |
| Wavelength                        | 0.71073 Å                                           |                    |
| Crystal system                    | Monoclinic                                          |                    |
| Space group                       | P2(1)/n                                             |                    |
| Unit cell dimensions              | a = 16.6466(3) Å                                    | α = 90°.           |
|                                   | b = 9.7584(2) Å                                     | β = 104.8460(10)°. |
|                                   | c = 17.6630(3) Å                                    | γ = 90°.           |
| Volume                            | 2773.47(9) Å <sup>3</sup>                           |                    |
| Z                                 | 4                                                   |                    |
| Density (calculated)              | 1.738 Mg/m <sup>3</sup>                             |                    |
| Absorption coefficient            | 5.097 mm <sup>-1</sup>                              |                    |
| F(000)                            | 1424                                                |                    |
| Crystal size                      | 0.20 x 0.20 x 0.10 mm <sup>3</sup>                  |                    |
| Theta range for data collection   | 2.39 to 27.18°.                                     |                    |
| Index ranges                      | -17 ≤ h ≤ 21, -9 ≤ k ≤ 12, -22 ≤ l ≤ 22             |                    |
| Reflections collected             | 16310                                               |                    |
| Independent reflections           | 6130 [R(int) = 0.0343]                              |                    |
| Completeness to theta = 27.18°    | 99.3 %                                              |                    |
| Absorption correction             | Semi-empirical from equivalents                     |                    |
| Max. and min. transmission        | 0.6297 and 0.4288                                   |                    |
| Refinement method                 | Full-matrix least-squares on F <sup>2</sup>         |                    |
| Data / restraints / parameters    | 6130 / 0 / 379                                      |                    |
| Goodness-of-fit on F <sup>2</sup> | 1.047                                               |                    |
| Final R indices [I > 2σ(I)]       | R1 = 0.0321, wR2 = 0.0736                           |                    |
| R indices (all data)              | R1 = 0.0469, wR2 = 0.0794                           |                    |
| Largest diff. peak and hole       | 2.297 and -0.751 e.Å <sup>-3</sup>                  |                    |

Table 2. Atomic coordinates ( $\times 10^4$ ) and equivalent isotropic displacement parameters ( $\text{\AA}^2 \times 10^3$ ) for compound **9a**.  $U(\text{eq})$  is defined as one third of the trace of the orthogonalized  $U^{ij}$  tensor.

|       | x       | y        | z        | U(eq) |
|-------|---------|----------|----------|-------|
| O(1)  | 3251(2) | 8280(4)  | -2591(2) | 53(1) |
| Pt(1) | 2909(1) | 9415(1)  | 963(1)   | 28(1) |
| N(1)  | 1737(2) | 10424(3) | 757(2)   | 31(1) |
| N(2)  | 1424(2) | 11029(4) | -620(2)  | 32(1) |
| N(3)  | 3484(2) | 11394(4) | 1138(2)  | 30(1) |
| N(4)  | 3021(2) | 12195(4) | -185(2)  | 30(1) |
| C(1)  | 1426(3) | 10533(5) | 1392(3)  | 42(1) |
| C(2)  | 691(3)  | 11192(5) | 1386(3)  | 45(1) |
| C(3)  | 218(3)  | 11762(5) | 715(3)   | 40(1) |
| C(4)  | 504(3)  | 11681(5) | 51(3)    | 33(1) |
| C(5)  | 214(3)  | 12136(5) | -736(3)  | 42(1) |
| C(6)  | 778(3)  | 11730(5) | -1126(3) | 43(1) |
| C(7)  | 1269(3) | 10999(4) | 106(2)   | 28(1) |
| C(8)  | 3824(3) | 11832(5) | 1872(3)  | 42(1) |
| C(9)  | 4027(3) | 13182(5) | 2066(3)  | 40(1) |
| C(10) | 3878(3) | 14172(5) | 1506(3)  | 37(1) |
| C(11) | 3537(3) | 13776(5) | 739(3)   | 32(1) |
| C(12) | 3264(3) | 14445(5) | 6(3)     | 42(1) |
| C(13) | 2960(3) | 13485(5) | -538(3)  | 40(1) |
| C(14) | 3367(2) | 12368(4) | 595(2)   | 28(1) |
| C(15) | 2884(3) | 10960(4) | -632(2)  | 29(1) |
| C(16) | 3542(3) | 10394(4) | -890(3)  | 34(1) |
| C(17) | 3364(3) | 9333(5)  | -1404(3) | 36(1) |
| C(18) | 2561(3) | 8806(5)  | -1663(3) | 36(1) |
| C(19) | 1915(3) | 9334(5)  | -1394(3) | 36(1) |
| C(20) | 2090(2) | 10424(4) | -870(2)  | 29(1) |
| C(21) | 2645(3) | 7652(6)  | -2241(3) | 47(1) |
| C(22) | 3155(4) | 6578(6)  | -1761(3) | 58(2) |
| C(23) | 3918(4) | 7053(6)  | -1514(3) | 59(2) |
| C(24) | 3874(3) | 8487(6)  | -1848(3) | 50(1) |
| C(25) | 4002(3) | 8419(4)  | 1211(3)  | 32(1) |

|       |         |         |         |       |
|-------|---------|---------|---------|-------|
| C(26) | 4512(3) | 8384(5) | 1953(3) | 43(1) |
| C(27) | 5254(3) | 7641(6) | 2132(3) | 52(1) |
| C(28) | 5471(3) | 6869(6) | 1571(3) | 50(1) |
| C(29) | 4975(3) | 6904(5) | 817(3)  | 51(1) |
| C(30) | 4249(3) | 7675(5) | 647(3)  | 42(1) |
| C(31) | 2337(3) | 7589(5) | 901(3)  | 32(1) |
| C(32) | 1883(3) | 7029(5) | 208(3)  | 49(1) |
| C(33) | 1467(4) | 5768(6) | 167(4)  | 60(2) |
| C(34) | 1507(3) | 5065(6) | 844(4)  | 57(2) |
| C(35) | 1932(3) | 5586(5) | 1537(4) | 53(1) |
| C(36) | 2342(3) | 6842(5) | 1562(3) | 45(1) |

Table 3. Bond lengths [ $\text{\AA}$ ] and angles [ $^\circ$ ] for compound **9a**.

|             |          |              |          |
|-------------|----------|--------------|----------|
| O(1)-C(21)  | 1.446(6) | C(4)-C(5)    | 1.420(6) |
| O(1)-C(24)  | 1.463(6) | C(5)-C(6)    | 1.358(7) |
| Pt(1)-C(25) | 2.009(4) | C(5)-H(5A)   | 0.9500   |
| Pt(1)-C(31) | 2.011(4) | C(6)-H(6A)   | 0.9500   |
| Pt(1)-N(1)  | 2.132(3) | C(8)-C(9)    | 1.382(7) |
| Pt(1)-N(3)  | 2.143(4) | C(8)-H(8A)   | 0.9500   |
| N(1)-C(7)   | 1.337(5) | C(9)-C(10)   | 1.359(7) |
| N(1)-C(1)   | 1.355(6) | C(9)-H(9A)   | 0.9500   |
| N(2)-C(7)   | 1.372(5) | C(10)-C(11)  | 1.384(6) |
| N(2)-C(6)   | 1.390(5) | C(10)-H(10A) | 0.9500   |
| N(2)-C(20)  | 1.422(5) | C(11)-C(14)  | 1.413(6) |
| N(3)-C(14)  | 1.328(5) | C(11)-C(12)  | 1.416(6) |
| N(3)-C(8)   | 1.344(5) | C(12)-C(13)  | 1.344(6) |
| N(4)-C(14)  | 1.360(5) | C(12)-H(12A) | 0.9500   |
| N(4)-C(13)  | 1.398(6) | C(13)-H(13A) | 0.9500   |
| N(4)-C(15)  | 1.427(5) | C(15)-C(20)  | 1.383(6) |
| C(1)-C(2)   | 1.380(7) | C(15)-C(16)  | 1.403(6) |
| C(1)-H(1A)  | 0.9500   | C(16)-C(17)  | 1.359(6) |
| C(2)-C(3)   | 1.363(7) | C(16)-H(16A) | 0.9500   |
| C(2)-H(2A)  | 0.9500   | C(17)-C(18)  | 1.396(6) |
| C(3)-C(4)   | 1.377(6) | C(17)-C(24)  | 1.536(7) |
| C(3)-H(3A)  | 0.9500   | C(18)-C(19)  | 1.381(7) |
| C(4)-C(7)   | 1.417(6) | C(18)-C(21)  | 1.551(7) |

|                   |            |                  |            |
|-------------------|------------|------------------|------------|
| C(19)-C(20)       | 1.390(6)   | C(25)-Pt(1)-N(3) | 93.35(15)  |
| C(19)-H(19A)      | 0.9500     | C(31)-Pt(1)-N(3) | 174.14(16) |
| C(21)-C(22)       | 1.473(7)   | N(1)-Pt(1)-N(3)  | 87.90(13)  |
| C(21)-H(21A)      | 1.0000     | C(7)-N(1)-C(1)   | 114.7(4)   |
| C(22)-C(23)       | 1.317(8)   | C(7)-N(1)-Pt(1)  | 130.3(3)   |
| C(22)-H(22A)      | 0.9500     | C(1)-N(1)-Pt(1)  | 115.0(3)   |
| C(23)-C(24)       | 1.513(8)   | C(7)-N(2)-C(6)   | 108.2(4)   |
| C(23)-H(23A)      | 0.9500     | C(7)-N(2)-C(20)  | 129.0(4)   |
| C(24)-H(24A)      | 1.0000     | C(6)-N(2)-C(20)  | 122.7(4)   |
| C(25)-C(26)       | 1.367(6)   | C(14)-N(3)-C(8)  | 114.6(4)   |
| C(25)-C(30)       | 1.378(7)   | C(14)-N(3)-Pt(1) | 124.3(3)   |
| C(26)-C(27)       | 1.396(7)   | C(8)-N(3)-Pt(1)  | 119.2(3)   |
| C(26)-H(26A)      | 0.9500     | C(14)-N(4)-C(13) | 107.7(3)   |
| C(27)-C(28)       | 1.366(8)   | C(14)-N(4)-C(15) | 129.2(4)   |
| C(27)-H(27A)      | 0.9500     | C(13)-N(4)-C(15) | 122.0(3)   |
| C(28)-C(29)       | 1.376(7)   | N(1)-C(1)-C(2)   | 123.8(5)   |
| C(28)-H(28A)      | 0.9500     | N(1)-C(1)-H(1A)  | 118.1      |
| C(29)-C(30)       | 1.390(6)   | C(2)-C(1)-H(1A)  | 118.1      |
| C(29)-H(29A)      | 0.9500     | C(3)-C(2)-C(1)   | 120.7(5)   |
| C(30)-H(30A)      | 0.9500     | C(3)-C(2)-H(2A)  | 119.6      |
| C(31)-C(36)       | 1.374(7)   | C(1)-C(2)-H(2A)  | 119.6      |
| C(31)-C(32)       | 1.377(6)   | C(2)-C(3)-C(4)   | 117.9(4)   |
| C(32)-C(33)       | 1.404(7)   | C(2)-C(3)-H(3A)  | 121.0      |
| C(32)-H(32A)      | 0.9500     | C(4)-C(3)-H(3A)  | 121.0      |
| C(33)-C(34)       | 1.366(9)   | C(3)-C(4)-C(7)   | 118.0(4)   |
| C(33)-H(33A)      | 0.9500     | C(3)-C(4)-C(5)   | 135.3(4)   |
| C(34)-C(35)       | 1.346(8)   | C(7)-C(4)-C(5)   | 106.8(4)   |
| C(34)-H(34A)      | 0.9500     | C(6)-C(5)-C(4)   | 107.4(4)   |
| C(35)-C(36)       | 1.398(7)   | C(6)-C(5)-H(5A)  | 126.3      |
| C(35)-H(35A)      | 0.9500     | C(4)-C(5)-H(5A)  | 126.3      |
| C(36)-H(36A)      | 0.9500     | C(5)-C(6)-N(2)   | 109.8(4)   |
|                   |            | C(5)-C(6)-H(6A)  | 125.1      |
| C(21)-O(1)-C(24)  | 95.0(3)    | N(2)-C(6)-H(6A)  | 125.1      |
| C(25)-Pt(1)-C(31) | 88.49(16)  | N(1)-C(7)-N(2)   | 127.3(4)   |
| C(25)-Pt(1)-N(1)  | 176.82(15) | N(1)-C(7)-C(4)   | 124.9(4)   |
| C(31)-Pt(1)-N(1)  | 89.98(15)  | N(2)-C(7)-C(4)   | 107.9(4)   |

|                    |          |                    |          |
|--------------------|----------|--------------------|----------|
| N(3)-C(8)-C(9)     | 123.9(4) | C(15)-C(20)-C(19)  | 120.8(4) |
| N(3)-C(8)-H(8A)    | 118.0    | C(15)-C(20)-N(2)   | 120.5(4) |
| C(9)-C(8)-H(8A)    | 118.0    | C(19)-C(20)-N(2)   | 118.6(4) |
| C(10)-C(9)-C(8)    | 120.6(4) | O(1)-C(21)-C(22)   | 100.7(4) |
| C(10)-C(9)-H(9A)   | 119.7    | O(1)-C(21)-C(18)   | 99.4(4)  |
| C(8)-C(9)-H(9A)    | 119.7    | C(22)-C(21)-C(18)  | 105.9(4) |
| C(9)-C(10)-C(11)   | 117.9(4) | O(1)-C(21)-H(21A)  | 116.1    |
| C(9)-C(10)-H(10A)  | 121.1    | C(22)-C(21)-H(21A) | 116.1    |
| C(11)-C(10)-H(10A) | 121.1    | C(18)-C(21)-H(21A) | 116.1    |
| C(10)-C(11)-C(14)  | 117.4(4) | C(23)-C(22)-C(21)  | 107.7(5) |
| C(10)-C(11)-C(12)  | 136.2(4) | C(23)-C(22)-H(22A) | 126.1    |
| C(14)-C(11)-C(12)  | 106.4(4) | C(21)-C(22)-H(22A) | 126.1    |
| C(13)-C(12)-C(11)  | 107.8(4) | C(22)-C(23)-C(24)  | 104.5(5) |
| C(13)-C(12)-H(12A) | 126.1    | C(22)-C(23)-H(23A) | 127.8    |
| C(11)-C(12)-H(12A) | 126.1    | C(24)-C(23)-H(23A) | 127.8    |
| C(12)-C(13)-N(4)   | 109.7(4) | O(1)-C(24)-C(23)   | 100.0(4) |
| C(12)-C(13)-H(13A) | 125.1    | O(1)-C(24)-C(17)   | 100.1(4) |
| N(4)-C(13)-H(13A)  | 125.1    | C(23)-C(24)-C(17)  | 106.0(4) |
| N(3)-C(14)-N(4)    | 126.0(4) | O(1)-C(24)-H(24A)  | 116.1    |
| N(3)-C(14)-C(11)   | 125.5(4) | C(23)-C(24)-H(24A) | 116.1    |
| N(4)-C(14)-C(11)   | 108.4(4) | C(17)-C(24)-H(24A) | 116.1    |
| C(20)-C(15)-C(16)  | 121.1(4) | C(26)-C(25)-C(30)  | 117.0(4) |
| C(20)-C(15)-N(4)   | 119.5(4) | C(26)-C(25)-Pt(1)  | 121.7(4) |
| C(16)-C(15)-N(4)   | 119.0(4) | C(30)-C(25)-Pt(1)  | 121.2(3) |
| C(17)-C(16)-C(15)  | 117.6(4) | C(25)-C(26)-C(27)  | 121.7(5) |
| C(17)-C(16)-H(16A) | 121.2    | C(25)-C(26)-H(26A) | 119.2    |
| C(15)-C(16)-H(16A) | 121.2    | C(27)-C(26)-H(26A) | 119.2    |
| C(16)-C(17)-C(18)  | 121.8(4) | C(28)-C(27)-C(26)  | 120.4(5) |
| C(16)-C(17)-C(24)  | 134.2(4) | C(28)-C(27)-H(27A) | 119.8    |
| C(18)-C(17)-C(24)  | 104.0(4) | C(26)-C(27)-H(27A) | 119.8    |
| C(19)-C(18)-C(17)  | 120.9(4) | C(27)-C(28)-C(29)  | 118.9(5) |
| C(19)-C(18)-C(21)  | 135.0(4) | C(27)-C(28)-H(28A) | 120.6    |
| C(17)-C(18)-C(21)  | 104.1(4) | C(29)-C(28)-H(28A) | 120.6    |
| C(18)-C(19)-C(20)  | 117.8(4) | C(28)-C(29)-C(30)  | 119.7(5) |
| C(18)-C(19)-H(19A) | 121.1    | C(28)-C(29)-H(29A) | 120.1    |
| C(20)-C(19)-H(19A) | 121.1    | C(30)-C(29)-H(29A) | 120.1    |



|                    |          |                    |          |
|--------------------|----------|--------------------|----------|
| C(25)-C(30)-C(29)  | 122.2(5) | C(32)-C(33)-H(33A) | 120.6    |
| C(25)-C(30)-H(30A) | 118.9    | C(35)-C(34)-C(33)  | 120.2(5) |
| C(29)-C(30)-H(30A) | 118.9    | C(35)-C(34)-H(34A) | 119.9    |
| C(36)-C(31)-C(32)  | 115.3(4) | C(33)-C(34)-H(34A) | 119.9    |
| C(36)-C(31)-Pt(1)  | 121.6(3) | C(34)-C(35)-C(36)  | 119.9(6) |
| C(32)-C(31)-Pt(1)  | 123.0(4) | C(34)-C(35)-H(35A) | 120.1    |
| C(31)-C(32)-C(33)  | 123.0(5) | C(36)-C(35)-H(35A) | 120.1    |
| C(31)-C(32)-H(32A) | 118.5    | C(31)-C(36)-C(35)  | 122.8(5) |
| C(33)-C(32)-H(32A) | 118.5    | C(31)-C(36)-H(36A) | 118.6    |
| C(34)-C(33)-C(32)  | 118.8(5) | C(35)-C(36)-H(36A) | 118.6    |
| C(34)-C(33)-H(33A) | 120.6    |                    |          |

Table 4. Anisotropic displacement parameters ( $\text{\AA}^2 \times 10^3$ ) for compound **9a**. The anisotropic displacement factor exponent takes the form:  $-2\pi^2 [ h^2 a^{*2} U^{11} + \dots + 2 h k a^* b^* U^{12} ]$

|       | $U^{11}$ | $U^{22}$ | $U^{33}$ | $U^{23}$ | $U^{13}$ | $U^{12}$ |
|-------|----------|----------|----------|----------|----------|----------|
| O(1)  | 67(2)    | 59(2)    | 38(2)    | -5(2)    | 22(2)    | 6(2)     |
| Pt(1) | 24(1)    | 27(1)    | 33(1)    | 2(1)     | 6(1)     | 1(1)     |
| N(1)  | 27(2)    | 29(2)    | 38(2)    | -4(2)    | 12(2)    | 0(2)     |
| N(2)  | 29(2)    | 37(2)    | 33(2)    | -4(2)    | 12(2)    | 6(2)     |
| N(3)  | 27(2)    | 30(2)    | 35(2)    | 1(2)     | 9(2)     | -1(2)    |
| N(4)  | 33(2)    | 23(2)    | 36(2)    | -1(2)    | 10(2)    | -1(2)    |
| C(1)  | 45(3)    | 46(3)    | 40(3)    | -1(2)    | 17(2)    | 1(2)     |
| C(2)  | 50(3)    | 45(3)    | 48(3)    | -3(2)    | 28(2)    | 4(2)     |
| C(3)  | 31(2)    | 38(3)    | 55(3)    | -7(2)    | 20(2)    | 1(2)     |
| C(4)  | 24(2)    | 31(3)    | 44(3)    | -6(2)    | 10(2)    | 0(2)     |
| C(5)  | 33(2)    | 46(3)    | 47(3)    | -3(2)    | 9(2)     | 12(2)    |
| C(6)  | 37(3)    | 53(3)    | 38(2)    | 4(2)     | 4(2)     | 12(2)    |
| C(7)  | 24(2)    | 27(2)    | 34(2)    | -6(2)    | 9(2)     | -2(2)    |
| C(8)  | 43(3)    | 48(3)    | 33(2)    | 3(2)     | 3(2)     | 4(2)     |
| C(9)  | 39(3)    | 45(3)    | 33(2)    | -13(2)   | 3(2)     | -1(2)    |
| C(10) | 35(2)    | 32(3)    | 48(3)    | -14(2)   | 14(2)    | -6(2)    |
| C(11) | 28(2)    | 26(2)    | 42(2)    | -6(2)    | 11(2)    | 2(2)     |
| C(12) | 51(3)    | 29(3)    | 47(3)    | -4(2)    | 17(2)    | -4(2)    |
| C(13) | 52(3)    | 29(3)    | 40(3)    | 3(2)     | 13(2)    | 2(2)     |

|       |       |       |        |        |       |        |
|-------|-------|-------|--------|--------|-------|--------|
| C(14) | 21(2) | 30(2) | 35(2)  | -5(2)  | 11(2) | 2(2)   |
| C(15) | 34(2) | 25(2) | 30(2)  | -2(2)  | 11(2) | -1(2)  |
| C(16) | 27(2) | 34(3) | 41(2)  | -2(2)  | 11(2) | -2(2)  |
| C(17) | 36(2) | 36(3) | 40(2)  | -3(2)  | 16(2) | 5(2)   |
| C(18) | 44(3) | 27(2) | 38(2)  | -4(2)  | 11(2) | -3(2)  |
| C(19) | 32(2) | 38(3) | 38(2)  | -3(2)  | 8(2)  | -6(2)  |
| C(20) | 30(2) | 30(3) | 30(2)  | -1(2)  | 10(2) | 2(2)   |
| C(21) | 53(3) | 49(3) | 39(3)  | -12(2) | 10(2) | -5(3)  |
| C(22) | 86(5) | 36(3) | 53(3)  | -2(3)  | 20(3) | 10(3)  |
| C(23) | 66(4) | 50(4) | 57(3)  | -14(3) | 7(3)  | 25(3)  |
| C(24) | 38(3) | 55(4) | 64(3)  | -17(3) | 24(2) | 2(3)   |
| C(25) | 33(2) | 24(2) | 40(2)  | 8(2)   | 10(2) | -4(2)  |
| C(26) | 38(3) | 46(3) | 47(3)  | 7(2)   | 13(2) | 6(2)   |
| C(27) | 34(3) | 59(4) | 58(3)  | 14(3)  | 4(2)  | 10(3)  |
| C(28) | 30(3) | 42(3) | 77(4)  | 16(3)  | 12(2) | 6(2)   |
| C(29) | 36(3) | 40(3) | 77(4)  | -6(3)  | 18(3) | 0(2)   |
| C(30) | 29(2) | 36(3) | 59(3)  | 3(2)   | 7(2)  | -1(2)  |
| C(31) | 26(2) | 26(2) | 44(3)  | 3(2)   | 11(2) | 4(2)   |
| C(32) | 50(3) | 39(3) | 55(3)  | -3(3)  | 7(2)  | 1(2)   |
| C(33) | 53(4) | 51(4) | 71(4)  | -17(3) | 6(3)  | -13(3) |
| C(34) | 40(3) | 28(3) | 105(5) | -4(3)  | 25(3) | -6(2)  |
| C(35) | 46(3) | 43(3) | 76(4)  | 11(3)  | 26(3) | -3(3)  |
| C(36) | 37(3) | 39(3) | 57(3)  | 2(3)   | 8(2)  | -3(2)  |

Table 5. Hydrogen coordinates ( $\times 10^4$ ) and isotropic displacement parameters ( $\text{\AA}^2 \times 10^3$ ) for compound 9a.

|       | x    | y     | z     | U(eq) |
|-------|------|-------|-------|-------|
| H(1A) | 1732 | 10131 | 1869  | 51    |
| H(2A) | 513  | 11250 | 1855  | 53    |
| H(3A) | -294 | 12202 | 705   | 48    |
| H(5A) | -283 | 12634 | -949  | 51    |
| H(6A) | 736  | 11899 | -1665 | 52    |
| H(8A) | 3930 | 11173 | 2282  | 51    |

|        |      |       |       |    |
|--------|------|-------|-------|----|
| H(9A)  | 4274 | 13421 | 2596  | 48 |
| H(10A) | 4004 | 15105 | 1637  | 45 |
| H(12A) | 3290 | 15402 | -84   | 50 |
| H(13A) | 2739 | 13658 | -1080 | 48 |
| H(16A) | 4091 | 10740 | -711  | 40 |
| H(19A) | 1370 | 8966  | -1562 | 43 |
| H(21A) | 2118 | 7340  | -2613 | 57 |
| H(22A) | 2967 | 5699  | -1650 | 70 |
| H(23A) | 4390 | 6598  | -1197 | 71 |
| H(24A) | 4413 | 8897  | -1884 | 60 |
| H(26A) | 4357 | 8877  | 2357  | 52 |
| H(27A) | 5609 | 7674  | 2646  | 62 |
| H(28A) | 5958 | 6317  | 1699  | 60 |
| H(29A) | 5128 | 6402  | 415   | 61 |
| H(30A) | 3912 | 7690  | 124   | 50 |
| H(32A) | 1849 | 7518  | -264  | 59 |
| H(33A) | 1164 | 5410  | -324  | 72 |
| H(34A) | 1233 | 4207  | 827   | 68 |
| H(35A) | 1954 | 5100  | 2008  | 63 |
| H(36A) | 2637 | 7194  | 2057  | 54 |

---
